# Supplementary material
Source: ML conference proceedings conference paper supplement (https://proceedings.neurips.cc/paper_files/paper/2020/hash/37e79373884f0f0b70b5cb91fb947148-Abstract.html)
Supplement: Supplementary file [file 37e79373884f0f0b70b5cb91fb947148-Supplemental.pdf]

---

# A Game-Theoretic Analysis of the Empirical Revenue Maximization Algorithm with Endogenous Sampling

---

Anonymous Author(s)

Affiliation

Address

email

## Abstract

1 The Empirical Revenue Maximization (ERM) is one of the most important price  
2 learning algorithms in auction design: as the literature shows it can learn approxi-  
3 mately optimal reserve prices for revenue-maximizing auctioneers in both repeated  
4 auctions and uniform-price auctions. However, in these applications the agents  
5 who provide inputs to ERM have incentives to manipulate the inputs to lower the  
6 outputted price. We generalize the definition of an incentive-awareness measure  
7 proposed by Lavi et al (2019), to quantify the reduction of ERM’s outputted price  
8 due to a change of  $m \geq 1$  out of  $N$  input samples, and provide specific conver-  
9 gence rates of this measure to zero as  $N$  goes to infinity for different types of  
10 input distributions. By adopting this measure, we construct an efficient, approxi-  
11 mately incentive-compatible, and revenue-optimal learning algorithm using ERM  
12 in repeated auctions against non-myopic bidders, and show approximate group  
13 incentive-compatibility in uniform-price auctions.

## 14 1 Introduction

15 In auction theory, it is well-known [30] that, when all buyers have values that are independently and  
16 identically drawn from a regular distribution  $F$ , the revenue-maximizing auction is simply the second  
17 price auction with anonymous reserve price  $p^* = \arg \max\{p(1 - F(p))\}$ : if the highest bid is at least  
18  $p^*$ , then the highest bidder wins the item and pays the maximum between the second highest bid  
19 and  $p^*$ . The computation of  $p^*$  requires the exact knowledge of the underlying value distribution,  
20 which is unrealistic because the value distribution is often unavailable in practice. Many works (e.g.,  
21 [11, 15, 23]) on sample complexity in auctions have studied how to obtain a near-optimal reserve  
22 price based on samples from the distribution  $F$  instead of knowing the exact  $F$ . One of the most  
23 important (and most fundamental) price learning algorithms in those works is the *Empirical Revenue*  
24 *Maximization* (ERM) algorithm, which simply outputs the reserve price that is optimal on the uniform  
25 distribution over samples (plus some regularization to prevent overfitting).

**Definition 1.1** (*c*-Guarded Empirical Revenue Maximization,  $\text{ERM}^c$ ). *Draw  $N$  samples from a distribution  $F$  and sort them non-increasingly, denoted by  $v_1 \geq v_2 \geq \dots \geq v_N$ . Given some regularization parameter  $0 \leq c < 1$ , choose:*

$$i^* = \arg \max_{cN < i \leq N} \{i \cdot v_i\}, \quad \text{define } \text{ERM}^c(v_1, \dots, v_N) = v_{i^*}.$$

26 *Assume that the smaller sample (with the larger index) is chosen in case of ties.*

27  $\text{ERM}^c$  was first proposed by Dhangwatnotai et al. [15] and then extensively studied by Huang  
28 et al. [23]. They show that the reserve price outputted by  $\text{ERM}^c$  is asymptotically optimal on the  
29 underlying distribution  $F$  as the number of samples  $N$  increases if  $F$  is bounded or has monotone  
30 hazard rate, with an appropriate choice of  $c$ . Other papers [5, 25] have continued to study  $\text{ERM}^c$ .

31 However, when ERM is put into practice, it is unclear how the samples can be obtained since many  
 32 times there is no impartial sampling source. A natural solution is *endogenous sampling*. For example,  
 33 in repeated second price auctions, the auctioneer can use the bids in previous auctions as samples  
 34 and run ERM to set a reserve price at each round. But this solution has a challenge of strategic issue:  
 35 since bidders can affect the determination of future reserve prices, they might have an incentive to  
 36 underbid in order to increase utility in future auctions.

37 Another example of endogenous sampling is the uniform-price auction. In a uniform-price auction  
 38 the auctioneer sells  $N$  copies of a good at some price  $p$  to  $N$  bidders with i.i.d. values  $v$  from  $F$  who  
 39 submit bids  $\mathbf{b}$ . Bidders who bid at least  $p$  obtain one copy and pay  $p$ . The auctioneer can set the  
 40 price to be  $p = \text{ERM}^0(v)$  to maximize revenue if bids are equal to values. But Goldberg et al. [17]  
 41 show that this auction is not incentive-compatible as bidders can lower the price by strategic bidding.  
 42 Therefore, the main question we consider in this paper is: *To what extent the presence of strategic*  
 43 *agents undermines ERM with endogenous sampling?*

44 To formally answer the question, we adopt a notion called “incentive-awareness measure” originally  
 45 proposed by Lavi et al. [26] under bitcoin’s fee market context, which measures the reduction of a  
 46 price learning function  $P$  due to a change of at most  $m$  samples out of the  $N$  input samples.

**Definition 1.2** (Incentive-awareness measures). *Let  $P : \mathbb{R}_+^N \rightarrow \mathbb{R}_+$  be a function (e.g.,  $\text{ERM}^c$ ) that maps  $N$  samples to a reserve price. Draw  $N$  i.i.d. values  $v_1, \dots, v_N$  from a distribution  $F$ . Let  $I \subseteq \{1, \dots, N\}$  be an index set of size  $|I| = m$ , and  $v_I = \{v_i \mid i \in I\}$ ,  $v_{-I} = \{v_j \mid j \notin I\}$ . A bidder can change  $v_I$  to any  $m$  non-negative bids  $b_I$ , hence change the price from  $P(v_I, v_{-I})$  to  $P(b_I, v_{-I})$ . Define the incentive-awareness measure:*

$$\delta_I(v_I, v_{-I}) = 1 - \frac{\inf_{b_I \in \mathbb{R}_+^m} P(b_I, v_{-I})}{P(v_I, v_{-I})},$$

47 *and worst-case incentive-awareness measures:*

$$\delta_m^{\text{worst}}(v_{-I}) = \sup_{v_I \in \mathbb{R}_+^m} [\delta_I(v_I, v_{-I})], \quad \Delta_{N,m}^{\text{worst}} = \mathbb{E}_{v_{-I} \sim F} [\delta_m^{\text{worst}}(v_{-I})].$$

48 A smaller incentive-awareness measure means that the reserve price is decreased by a less amount  
 49 when a bidder bids strategically. Since the reduction of reserve price usually increases bidders’  
 50 utility, a smaller incentive-awareness measure implies that a bidder cannot benefit a lot from strategic  
 51 bidding, hence the name “incentive-awareness measure”.<sup>1</sup>

52 Lavi et al. [26] defined incentive-awareness measures only for  $m = 1$  and showed that for any  
 53 distribution  $F$  with a finite support size,  $\Delta_{N,1}^{\text{worst}} \rightarrow 0$  as  $N \rightarrow \infty$ . Later, Yao [31] showed that  
 54  $\Delta_{N,1}^{\text{worst}} \rightarrow 0$  for any continuous distribution with support included in  $[1, D]$ . They did not provide  
 55 specific convergent rates of  $\Delta_{N,1}^{\text{worst}}$ . We generalize their definition to allow  $m \geq 1$ , which is crucial in  
 56 our two applications to be discussed. Our main theoretical contribution is to provide upper bounds on  
 57  $\Delta_{N,m}^{\text{worst}}$  for two types of value distributions  $F$ : the class of Monotone Hazard Rate (MHR) distributions  
 58 where  $\frac{f(v)}{1-F(v)}$  is non-decreasing over the support of the distribution (we use  $F$  to denote the CDF and  
 59  $f$  for PDF) and the class of bounded distributions which consists of all (continuous and discontinuous)  
 60 distributions with support included in  $[1, D]$ . MHR distribution can be unbounded so we are the first  
 61 to consider incentive-awareness measures for unbounded distributions.

62 **Theorem 1.3** (Main). *Let  $P = \text{ERM}^c$ . The worst-case incentive-awareness measure is bounded by*

- 63 • *for MHR  $F$ ,  $\Delta_{N,m}^{\text{worst}} = O\left(m \frac{\log^3 N}{\sqrt{N}}\right)$ , if  $m = o(\sqrt{N})$  and  $\frac{m}{N} \leq c \leq \frac{1}{4e}$ .<sup>2</sup>*
- 64 • *for bounded  $F$ ,  $\Delta_{N,m}^{\text{worst}} = O\left(D^{8/3} m^{2/3} \frac{\log^2 N}{N^{1/3}}\right)$ , if  $m = o(\sqrt{N})$  and  $\frac{m}{N} \leq c \leq \frac{1}{2D}$ .*

65 *The constants in the two big  $O$ ’s are independent of  $F$  and  $c$ .*

66 This theorem implies that as long as the fraction of samples controlled by a bidder is relatively small,  
 67 the strategic behavior of each bidder has little impact on ERM provided that other bidders are truthful.  
 68 We will discuss intuitions and difficulties of the proof later and give an overview in Section 4.

<sup>1</sup>Lavi et al. [26] use the name “discount ratio” which we feel can be confused with the standard meaning of a discount ratio in repeated games.

<sup>2</sup>We use  $a(n) = o(b(n))$  to denote  $\lim_{n \rightarrow +\infty} \frac{a(n)}{b(n)} = 0$ .

69 **Repeated auctions against non-myopic bidders.** Besides theoretical analysis, we apply the  
70 incentive-awareness measure to real-world scenarios to demonstrate the effect of strategic bid-  
71 ding on ERM. The main application we consider is repeated auctions where bidders participate in  
72 multiple auctions and have incentives to bid strategically to affect the auctions the seller will use in  
73 the future (Section 2). We consider a two-phase learning algorithm: the seller first runs second price  
74 auctions with no reserve for some time to collect samples, and then use these samples to set reserve  
75 prices by ERM in the second phase. The upper bound on the incentive-awareness measure of ERM  
76 implies that this algorithm is approximately incentive-compatible.

77 Kanoria and Nazerzadeh [25], Liu et al. [27], and Abernethy et al. [1] consider repeated auctions  
78 scenarios similar to ours. Kanoria and Nazerzadeh [25] set *personalized* reserve prices by ERM in  
79 repeated second-price auctions, so at least two bidders are needed in each auction and they will face  
80 different reserve prices. We use *anonymous* reserve price so we allow only one bidder to participate  
81 in the auctions and when there are more than one bidder they face the same price, thus preventing  
82 discrimination. Liu et al. [27] and Abernethy et al. [1] design approximately incentive-compatible  
83 algorithms using differential privacy techniques rather than pure ERM. Comparing with them, our  
84 two-phase ERM algorithm is more practical as it is much simpler, and their algorithms rely on the  
85 boundedness of value distributions while we allow unbounded distributions. Moreover, their results  
86 require a large number of auctions while ours need a large number of samples in the first phase which  
87 can be obtained by either few bids in many auctions, many bids in few auctions, or combined.

88 **Uniform-price auctions and incentive-compatibility in the large.** Another scenario to which we  
89 apply the incentive-awareness measure of ERM is uniform-price auctions (Section 3). Azevedo and  
90 Budish [4] show that, uniform-price auctions are *incentive-compatible in the large* in the sense that  
91 truthful bidding is an approximate equilibrium when there are many bidders in the auction. In fact,  
92 incentive-compatibility in the large is the intuition of Theorem 1.3: when  $N$  is large, no bidders can  
93 influence the learned price by much. The proof in [4] directly makes use of this intuition, showing  
94 that the bid of one bidder can affect the empirical distribution consisting of the  $N$  bids only by a little.  
95 However, their argument, which crucially relies on the assumption that bidders' value distribution  
96 has a *finite* support and bids must be chosen *from this finite support* as well, fails when the value  
97 distribution is *continuous* or *bids can be any real numbers*, as what we allow. We instead, appeal to  
98 some specific properties of ERM to show that it is incentive-compatible in the large.

99 **Additional related works.** Previous works on ERM mainly focus on its sample complexity, started  
100 by Cole and Roughgarden [11]. While ERM is suitable for the case of i.i.d. values (e.g., [23]), the  
101 literature on sample complexity has expanded to more general cases of non-i.i.d. values and multi-  
102 dimensional values, e.g. [29, 14, 19, 20], or considering non-truthful auctions, e.g. [21]. Babaioff  
103 et al. [5] study the performance of ERM with just two samples. While this literature assumes that  
104 samples are exogenous, our main contribution is to consider endogenous samples that are collected  
105 from bidders who are affected by the outcome of the learning algorithm.

106 Some works study repeated auctions but with myopic bidders [7, 28, 10, 9]. Existing works about  
107 non-myopic bidders focus on designing various learning algorithms to maximize revenue assuming  
108 bidders playing best responds [2, 3, 12, 18] or using no-regret learning algorithm [8]. We complement  
109 that line of works by showing that ERM, the most fundamental algorithm we believe, also has good  
110 performance in repeated auctions against strategic bidders.

111 Other works about incentive-aware learning (e.g., [13, 24, 6, 16]) consider settings different from  
112 ours. For example, [13] and [24] study repeated auctions where buyers' values are drawn from some  
113 distribution at first and then fixed throughout. The seller knows the distribution and tries to learn the  
114 exact values, which is different from our assumption that the distribution is unknown to the seller.

## 115 2 Main Application: A Two-Phase Model

116 Here we consider a *two-phase model* as a real-world scenario where strategic bidding affects ERM:  
117 the seller first runs second price auctions with no reserve for some time to collect samples, and then  
118 use these samples to set reserve prices by ERM in the second phase. This model can be regarded as  
119 an "exploration and exploitation" learning algorithm in repeated auctions, and we will show that this  
120 algorithm can be approximately incentive-compatible and revenue-optimal.

121 **2.1 The Model**

122 A two-phase model is denoted by  $\text{TP}(\mathcal{M}, P; F, \mathbf{T}, \mathbf{m}, \mathbf{K}, S)$ , where  $\mathcal{M}$  is a truthful, prior-  
 123 independent mechanism,  $P$  is a price learning function,  $\mathbf{T} = (T_1, T_2)$  are the numbers of auctions in  
 124 the two phases,  $\mathbf{m} = (m_1, m_2)$  are upper bounds on the number of auctions each bidder participates  
 125 in,  $\mathbf{K} = (K_1, K_2)$  are the number of bidders in auctions,  $S = S_1 \times \dots \times S_n$  is the strategy space,  
 126 where  $s_i \in S_i : \mathbb{R}_+^{m_{i,1}+m_{i,2}} \rightarrow \mathbb{R}_+^{m_{i,1}}$  is a strategy of bidder  $i = 1, \dots, n$ . The procedure is:

- 127 • At the beginning, each bidder realizes  $\mathbf{v}_i = (v_{i,1}, \dots, v_{i,m_{i,1}+m_{i,2}})$  i.i.d. drawn from  $F$ .  
 128 Let  $\mathbf{v}_{-i}$  denote the values of bidders other than  $i$ . Bidder  $i$  knows  $\mathbf{v}_i$  but does not know  $\mathbf{v}_{-i}$ .
- 129 • In the exploration phase,  $T_1$  auctions are run using  $\mathcal{M}$  and bidders bid according to some  
 130 strategy  $s \in S$ . Each auction has  $K_1$  bidders and each bidder  $i$  participates in  $m_{i,1} \leq m_1$   
 131 auctions. The auctioneer observes a random vector of bids  $\mathbf{b} = (b_1, \dots, b_{T_1 K_1})$  with the  
 132 following distribution: let  $I$  be an index set corresponding to bidder  $i$ , with size  $|I| = m_{i,1}$ ;  
 133 then  $\mathbf{b} = (b_I, b_{-I})$ , where  $b_I \sim s_i(\mathbf{v}_i)$ , and  $b_{-I} \sim s_{-i}(\mathbf{v}_{-i})$ .
- 134 • In the exploitation phase,  $T_2$  second price auctions ( $K_2 \geq 2$ ) or posted price auctions  
 135 ( $K_2 = 1$ ) are run, with reserve price  $p = P(\mathbf{b})$ . Each auction has  $K_2$  bidders and each  
 136 bidder  $i$  participates in  $m_{i,2} \leq m_2$  auctions. The auctions in this phase are truthful because  
 137  $p$  has been fixed.

138 **Utilities.** Denote the utility of bidder  $i$  as:

$$U_i^{\text{TP}}(\mathbf{v}_i, b_I, b_{-I}) = U_i^{\mathcal{M}}(\mathbf{v}_i, b_I, b_{-I}) + \sum_{t=m_{i,1}+1}^{m_{i,1}+m_{i,2}} u^{K_2}(v_{i,t}, P(b_I, b_{-I})), \quad (1)$$

139 where  $U_i^{\mathcal{M}}(v_I, b_I, b_{-I})$  is the utility of bidder  $i$  in the first phase, and  $u^{K_2}(v, p)$  is the interim utility  
 140 of a bidder with value  $v$  in a second price auction with reserve price  $p$  among  $K_2 \geq 1$  bidders:

$$u^{K_2}(v, p) = \mathbb{E}_{X_2, \dots, X_{K_2} \sim F} \left[ (v - \max\{p, X_2, \dots, X_{K_2}\}) \cdot \mathbb{I}[v > \max\{p, X_2, \dots, X_{K_2}\}] \right]. \quad (2)$$

141 The *interim utility* of bidder  $i$  in the two-phase model is  $\mathbb{E}_{\mathbf{v}_{-i} \sim F} [U_i^{\text{TP}}(\mathbf{v}_i, b_I, b_{-I})]$ .

142 **Approximate Bayesian incentive-compatibility.** We use the additive version of the solution concept  
 143 of an  $\epsilon$ -Bayesian-Nash equilibrium ( $\epsilon$ -BNE), i.e., in such a solution concept, no player can improve  
 144 her utility by more than  $\epsilon$  by deviating from the equilibrium strategy. We say a mechanism is  
 145  $\epsilon$ -approximately Bayesian incentive-compatible ( $\epsilon$ -BIC) if truthful bidding is an  $\epsilon$ -BNE, i.e., if for  
 146 any  $\mathbf{v}_i \in \mathbb{R}_+^{m_{i,1}+m_{i,2}}$ , any  $b_I \in \mathbb{R}_+^{m_{i,1}}$ ,

$$\mathbb{E}_{\mathbf{v}_{-i} \sim F} [U_i^{\text{TP}}(\mathbf{v}_i, b_I, v_{-I}) - U_i^{\text{TP}}(\mathbf{v}_i, v_I, v_{-I})] \leq \epsilon,$$

147 If a mechanism is  $\epsilon$ -BIC and  $\lim_{n \rightarrow \infty} \epsilon = 0$ , then each bidder knows that if all other bidders are  
 148 bidding truthfully then the gain from any deviation from truthful bidding is negligible for her. To  
 149 realize that strategic bidding cannot benefit them much, bidders do not need to know the underlying  
 150 distribution, but only the fact that the mechanism is  $\epsilon$ -BIC. We are therefore going to assume in this  
 151 paper that, in such a case, all bidders will bid truthfully.

152 **Approximate revenue optimality.** We say that a mechanism is  $(1 - \epsilon)$  revenue optimal, for some  
 153  $0 < \epsilon < 1$ , if its expected revenue is at least  $(1 - \epsilon)$  times the expected revenue of Myerson  
 154 auction. Huang et al. [23] show that a one-bidder auction with posted price set by  $\text{ERM}^c$  (for an  
 155 appropriate  $c$ ) and with  $N$  samples from the value distribution is  $(1 - \epsilon)$  revenue optimal with  $\epsilon =$   
 156  $O((N^{-1} \log N)^{2/3})$  for MHR distributions and  $\epsilon = O(\sqrt{DN^{-1} \log N})$  for bounded distributions.

157 **The i.i.d. assumption.** Our assumption of i.i.d. values is reasonable because in our scenario there is  
 158 a large population of bidders, and we can regard this population as a distribution and each bidder  
 159 as a sample from it. So from each bidder's perspective, the values of other bidders are i.i.d. from  
 160 this distribution. Then the  $\epsilon$ -BIC notion implies that when others bid truthfully, it is approximately  
 161 optimal for bidder  $i$  to bid truthfully no matter what her value is.

162 **2.2 Incentive-Compatibility and Revenue Optimality**

163 Now we show that, as the incentive-awareness measure of  $P$  becomes lower, the price learning  
 164 function becomes more incentive-aware in the sense that bidders gain less from non-truthful bidding:

165 **Theorem 2.1.** In  $\text{TP}(\mathcal{M}, P; F, T, \mathbf{m}, \mathbf{K}, S)$ , truthful bidding is an  $\epsilon$ -BNE, where,

- 166 • for any  $P$  and any bounded  $F$ ,  $\epsilon = m_2 D \Delta_{T_1 K_1, m_1}^{\text{worst}}$ , and
- 167 • for any MHR  $F$ , if we fix  $P = \text{ERM}^c$  with  $\frac{m_1}{T_1 K_1} \leq c \leq \frac{1}{4e}$  and  $m_1 = o(\sqrt{T_1 K_1})$ , then
- 168  $\epsilon = O(m_2 v^* \Delta_{T_1 K_1, m_1}^{\text{worst}}) + O\left(\frac{m_2 v^*}{\sqrt{T_1 K_1}}\right)$ , where  $v^* = \arg \max_v \{v[1 - F(v)]\}$ .

169 The constants in big  $O$ 's are independent of  $F$  and  $c$ .

170 Combined with Theorem 1.3 which upper bounds the incentive-awareness measure, we can obtain  
 171 explicit bounds on truthfulness of the two-phase model by plugging in  $N = T_1 K_1$  and  $m = m_1$ .  
 172 Precisely, for any bounded  $F$ ,  $\epsilon = O\left(D^{11/3} m_2 m_1^{2/3} \frac{\log^2(T_1 K_1)}{(T_1 K_1)^{1/3}}\right)$  if  $m_1 = o(\sqrt{T_1 K_1})$  and  $\frac{m_1}{T_1 K_1} \leq$   
 173  $c \leq \frac{1}{2D}$ . For any MHR  $F$ ,  $\epsilon = O\left(v^* m_2 m_1 \frac{\log^3(T_1 K_1)}{\sqrt{T_1 K_1}}\right)$  if  $m_1 = o(\sqrt{T_1 K_1})$  and  $\frac{m_1}{T_1 K_1} \leq c \leq \frac{1}{4e}$ .  
 174 Thus, for both cases, keeping all the parameters except  $T_1$  constant (in particular  $m_1$  and  $m_2$  are  
 175 constants) implies that  $\epsilon \rightarrow 0$  at a rate which is not slower than  $O((T_1)^{-1/3} \log^3 T_1)$  as  $T_1 \rightarrow +\infty$ .

176 To simultaneously obtain both approximate BIC and approximate revenue optimality, a certain  
 177 balance between the number of auctions in the two phases must be maintained. Few auctions in the  
 178 first phase and many auctions in the second phase hurt truthfulness as the loss from non-truthful  
 179 bidding (i.e., losing in the first phase) is small compared to the gain from manipulating the reserve  
 180 price in the second phase. Many auctions in the first phase are problematic as we do not have any  
 181 good revenue guarantees in the first phase (since we allow any truthful  $\mathcal{M}$ ). Thus, a certain balance  
 182 must be maintained, as expressed formally in the following theorem:

183 **Theorem 2.2.** Assume that  $K_2 \geq K_1 \geq 1$  and let  $\bar{m} = m_1 + m_2$ . In  
 184  $\text{TP}(\mathcal{M}, \text{ERM}^c; F, T, \mathbf{m}, \mathbf{K}, S)$ , to simultaneously obtain  $\epsilon_1$ -BIC and  $(1 - \epsilon_2)$  revenue optimal-  
 185 ity (assuming truthful bidding), it suffices to set the parameters as follows:

- 186 • If  $F$  is an MHR distribution,  $\frac{\bar{m}}{T_1 K_1} \leq c \leq \frac{1}{4e}$ ,  $\bar{m} = o(\sqrt{T_1 K_1})$ , then
- 187  $\epsilon_1 = O\left(v^* \bar{m}^2 \frac{\log^3(T_1 K_1)}{\sqrt{T_1 K_1}}\right)$ , and  $\epsilon_2 = O\left(\frac{T_1}{T} + \left[\frac{\log(T_1 K_1)}{T_1 K_1}\right]^{\frac{2}{3}}\right)$ .
- 188 • If  $F$  is bounded and regular,  $\frac{\bar{m}}{T_1 K_1} \leq c \leq \frac{1}{2D}$ ,  $\bar{m} = o(\sqrt{T_1 K_1})$ , then
- 189  $\epsilon_1 = O\left(D^{11/3} \bar{m}^{5/3} \frac{\log^2(T_1 K_1)}{(T_1 K_1)^{1/3}}\right)$ , and  $\epsilon_2 = O\left(\frac{T_1}{T} + \sqrt{\frac{D \cdot \log(T_1 K_1)}{T_1 K_1}}\right)$ .<sup>3</sup>

190 The proof is given in Appendix C.2. This theorem makes explicit the fact that in order to simulta-  
 191 neously obtain approximate BIC and approximate revenue optimality,  $T_1$  cannot be too small nor  
 192 too large: for approximate revenue optimality we need  $T_1 \ll T$  and for approximate BIC we need,  
 193 e.g.,  $T_1 \gg (v^*)^2 \bar{m}^4 \log^6(v^* \bar{m}) / K_1$  for MHR distributions, and  $T_1 \gg D^{11} \bar{m}^5 \log^6(D \bar{m}) / K_1$  for  
 194 bounded distributions. When setting the parameters in this way, both  $\epsilon_1$  and  $\epsilon_2$  go to 0 as  $T \rightarrow \infty$ .

### 195 2.3 Multi-Unit Extension

196 The auction in the exploitation phase can be generalized to a multi-unit Vickrey auction with  
 197 anonymous reserve, where  $k \geq 1$  identical units of an item are sold to  $K_2$  unit-demand bidders and  
 198 among those bidders whose bids are greater than the reserve price  $p$ , at most  $k$  bidders with largest  
 199 bids win the units and pay the maximum between  $p$  and the  $(k + 1)$ -th largest bid. The multi-unit  
 200 Vickrey auction with an anonymous reserve price is revenue-optimal when the value distribution is  
 201 regular, and the optimal reserve price does not depend on  $k$  or  $K_2$  according to Myerson [30]. Thus  
 202 the optimal reserve price can also be found by  $\text{ERM}^c$ . All our results concerning truthfulness, e.g.,

<sup>3</sup>The requirement that  $F$  is regular in addition to being bounded comes from the fact that  $\text{ERM}^c$  approximates the optimal revenue in an auction with many bidders only for regular distributions. In fact, the sample complexity literature on  $\text{ERM}^c$  only studies the case of one bidder (which is, in our notation,  $K_2 = 1$ ). In this case, i.e., if the second phase uses posted price auctions, we do not need the regularity assumption. To capture the case of general  $K_2$ , we make a technical observation that for regular distributions  $(1 - \epsilon)$  revenue optimality for a single buyer implies  $(1 - \epsilon)$  revenue optimality for many buyers (Lemma C.1). We do not know if this is true without the regularity assumption or if this observation – which may be of independent interest – was previously known.

203 Theorem 2.1, still hold for the multi-unit extension with any  $k \geq 1$ . Moreover, Theorem 2.2 also  
 204 holds because we have already considered the multi-unit extension in its proof in Appendix C.2.

## 205 2.4 Two-Phase ERM Algorithm in Repeated Auctions

206 The two-phase model with ERM as the price learning function can be seen as a learning algorithm in  
 207 the following setting of repeated auctions against strategic bidders: there are  $T$  rounds of auctions,  
 208 there are  $K \geq 1$  bidders in each auction, and each bidder participates in at most  $\bar{m}$  auctions. The  
 209 algorithm, which we call “two-phase ERM”, works as follows: in the first  $T_1$  rounds, run any truthful,  
 210 prior-independent auction  $\mathcal{M}$  (e.g., the second price auction with no reserve); in the later  $T_2 = T - T_1$   
 211 rounds, run second price auction with reserve  $p = \text{ERM}^c(b_1, \dots, b_{T_1 K})$  where  $b_1, \dots, b_{T_1 K}$  are the  
 212 bids from the first  $T_1$  auctions.  $T_1$  and  $c$  are adjustable parameters.

213 In repeated games, one may also consider  $\epsilon$ -perfect Bayesian equilibrium ( $\epsilon$ -PBE) as the solution  
 214 concept besides  $\epsilon$ -BNE. A formal definition is given in Appendix C.4 but roughly speaking,  $\epsilon$ -PBE  
 215 requires that the bidding of each bidder at each round of the auctions  $\epsilon$ -approximately maximizes  
 216 the total expected utility in all future rounds, conditioning on any observed history of allocations  
 217 and payments. Note that the history may leak some information about the historical bids of other  
 218 buyers and these bids will affect the seller’s choice of mechanisms in future rounds. Similar to  
 219 the  $\epsilon$ -BNE notion, we can show that the two-phase ERM algorithm obtains: (1) truthful bidding  
 220 is an  $O\left(\log^2(T_1 K) \sqrt[3]{\frac{D^{11} K \bar{m}}{T_1}}\right)$ -PBE; (2)  $\left(1 - O\left(\frac{T_1}{T} + \sqrt{\frac{D \log(T_1 K)}{T_1 K}}\right)\right)$  revenue optimality, for  
 221 bounded distributions; and similar results for MHR distributions. By choosing  $T_1 = \tilde{O}(T^{\frac{2}{3}})$  to  
 222 maximize revenue, we obtain  $\tilde{O}(T^{-\frac{2}{3}})$ -truthfulness and  $(1 - \tilde{O}(T^{-\frac{1}{3}}))$  revenue optimality, where  
 223 we assume  $D, \bar{m}$ , and  $K$  to be constant.<sup>4</sup>

224 Under the same setting, Liu et al. [27] and Abernethy et al. [1] design learning algorithms using  
 225 differential privacy techniques. We can compare two-phase ERM and their algorithms. In terms  
 226 of truthfulness notion, Liu et al. [27] assume that bidders play an exact PBE instead of  $\epsilon$ -PBE,  
 227 so their result is incomparable with ours. Their notion of exact PBE is too strong to be practical  
 228 because bidders need to do a large amount of computation, while our notion guarantees bidders of  
 229 approximately optimal utility as long as they bid truthfully. Although our truthfulness bound is worse  
 230 than the  $\tilde{O}(\frac{1}{\sqrt{T}})$ -bound of [1], we emphasize that their  $\epsilon$ -truthfulness notion is *weaker* than ours: in  
 231 their definition, each bidder cannot gain more than  $\epsilon$  in current and future rounds if she deviates from  
 232 truthful bidding *only in the current round*, given any fixed future strategy. But in our definition, each  
 233 bidder cannot gain more than  $\epsilon$  if she deviates *in current and all future rounds*. Our algorithm is  
 234 easier to implement and more time-efficient than theirs, and works for unbounded distribution while  
 235 theirs only support bounded distributions because they need to discretize the value space.

## 236 3 A Second Application: Uniform-Price Auctions

237 The notion of an incentive-awareness measure (recall Definition 1.2) has implications regarding  
 238 the classic uniform-price auction model, which we believe are of independent interest. In a static  
 239 uniform-price auction we have  $N$  copies of a good and  $N$  unit-demand bidders with i.i.d. values  $v$   
 240 from  $F$  that submit bids  $\mathbf{b}$ . The auctioneer then sets a price  $p = P(\mathbf{b})$ . Each bidder  $i$  whose value  $v_i$   
 241 is above or equal to  $p$  receives a copy of the good and pays  $p$ , obtaining a utility of  $v_i - p$ ; otherwise  
 242 the utility is zero. Azevedo and Budish [4] show that this auction is “incentive-compatible in the  
 243 large” which means that truthfulness is an  $\epsilon$ -BNE and  $\epsilon$  goes to zero as  $N$  goes to infinity. They  
 244 assume bidders’ value distribution has a finite support and their bids must be chosen from this finite  
 245 support as well. They mention that allowing continuous supports and arbitrary bids is challenging.

246 In this context, taking  $P = \text{ERM}^c$  is very natural when the auctioneer aims to maximize revenue.  
 247 Indeed, Goldberg et al. [17] suggest to use the uniform-price auction with  $P = \text{ERM}^c$ , where  $c = \frac{1}{N}$ ,  
 248 as a revenue benchmark for evaluating other truthful auctions they design.

249 When the price function is  $P = \text{ERM}^{c=\frac{1}{N}}$ , our analysis of the incentive-awareness measure general-  
 250 izes the result of [4] to bounded and to MHR distributions. Moreover, we generalize their result to the  
 251 case where coalitions of at most  $m$  bidders can coordinate bids and jointly deviate from truthfulness.

<sup>4</sup>The  $\tilde{O}$  notation omits polylogarithmic terms.

252 **Theorem 3.1.** *In the uniform-price auction, suppose that any  $m$  bidders can jointly deviate from*  
 253 *truthful bidding, then no bidder can obtain  $\epsilon$  more utility (we call this  $(m, \epsilon)$ -group BIC), where,*

- 254 • for any  $P$  and any bounded  $F$ ,  $\epsilon = D\Delta_{N,m}^{\text{worst}}$ , and
- 255 • for any MHR distribution  $F$ , if we fix  $P = \text{ERM}^c$  with  $\frac{m}{N} \leq c \leq \frac{1}{4e}$  and  $m = o(\sqrt{N})$ , then  
 256  $\epsilon = O(v^* \Delta_{N,m}^{\text{worst}}) + O\left(\frac{v^*}{\sqrt{N}}\right)$ , where  $v^* = \arg \max_v \{v[1 - F(v)]\}$ .

257 *The constants in big  $O$ 's are independent of  $F$  and  $c$ .*

*Proof of Theorem 3.1 for bounded distributions.* Denote a coalition of  $m$  bidders by an index set  $I \subseteq \{1, \dots, N\}$ , and the true values of all bidders by  $(v_I, v_{-I})$ . When other bidders bid  $v_{-I}$  truthfully, and the coalition bids  $b_I$  instead of  $v_I$ , the reduction of price is at most

$$P(v_I, v_{-I}) - P(b_I, v_{-I}) \leq P(v_I, v_{-I})\delta_I(v_I, v_{-I}) \leq P(v_I, v_{-I})\delta_m^{\text{worst}}(v_{-I}) \leq D\delta_m^{\text{worst}}(v_{-I}),$$

258 by Definition 1.2 and by the fact that all values are upper-bounded by  $D$ . Then for each bidder  $i \in I$ ,  
 259 the increase of her utility by such a joint deviation is no larger than the reduction of price, i.e.

$$\begin{aligned} \mathbb{E}_{v_{-I}} [u_i(v_I, P(b_I, v_{-I})) - u_i(v_I, P(v_I, v_{-I}))] &\leq \mathbb{E}_{v_{-I}} [P(v_I, v_{-I}) - P(b_I, v_{-I})] \\ &\leq D\mathbb{E}_{v_{-I}} [\delta_m^{\text{worst}}(v_{-I})] = D\Delta_{N,m}^{\text{worst}}. \end{aligned}$$

260

□

261 The proof of this theorem for MHR distributions is similar to the proof of Theorem 2.1, thus omitted.

262 Combining with Theorem 1.3, we conclude that the uniform-price auction with  $P = \text{ERM}^c$  (for  
 263 the  $c$ 's mentioned there) is  $(m, \epsilon)$ -group BIC with  $\epsilon$  converging to zero at a rate not slower than  
 264  $O(m^{2/3} \frac{\log^2 N}{N^{1/3}})$  for bounded distributions and  $O(m \frac{\log^3 N}{\sqrt{N}})$  for MHR distributions (constants in these  
 265 big  $O$ 's depend on distributions).

266 Theorem 3.1 also generalizes the result in [26] which is only for bounded distributions and  $m = 1$ .

## 267 4 More Discussions on Incentive-awareness Measures

### 268 4.1 Overview of the Proof for Upper Bounds on $\Delta_{N,m}^{\text{worst}}$

269 Here we provide an overview of the proof of Theorem 1.3. Details are in Appendix B.

270 Firstly, we show an important property of  $\text{ERM}^c$ : suppose  $c \geq \frac{m}{N}$ , for any  $m$  values  $v_I$ , any  $N - m$   
 271 values  $v_{-I}$ , and any  $m$  values  $\bar{v}_I$  that are greater than or equal to the maximum value in  $v_{-I}$ , we have  
 272  $\text{ERM}^c(\bar{v}_I, v_{-I}) \geq \text{ERM}^c(v_I, v_{-I})$ . As a consequence,  $\delta_m^{\text{worst}}(v_{-I}) = \delta_I(\bar{v}_I, v_{-I})$ .

273 Based on this property, we transfer the expectation in the incentive-awareness measure in the following  
 274 way:

$$\begin{aligned} \Delta_{N,m}^{\text{worst}} &= \mathbb{E}[\delta_m^{\text{worst}}(v_{-I})] = \mathbb{E}[\delta_I(\bar{v}_I, v_{-I})] = \int_0^1 \Pr[\delta_I(\bar{v}_I, v_{-I}) > \eta] d\eta \\ &\leq \int_0^1 (\Pr[\delta_I(\bar{v}_I, v_{-I}) > \eta \mid \bar{E}] \Pr[\bar{E}] + \Pr[E]) d\eta = \int_0^1 \Pr[\delta_I(\bar{v}_I, v_{-I}) > \eta \wedge \bar{E}] d\eta + \Pr[E], \end{aligned}$$

275 where  $E$  denotes the event that the index  $k^* = \arg \max_{i > cN} \{iv_i\}$  (which is the index selected by  
 276  $\text{ERM}^c$ ) satisfies  $k^* \leq dN$ ,  $\bar{E}$  denotes the complement of  $E$ , and the probability in  $\Pr[E]$  is taken  
 277 over the random draw of  $N - m$  i.i.d. samples from  $F$ , with other  $m$  samples fixed to be the upper  
 278 bound (can be  $+\infty$ ) of the distribution. For any value distribution, we prove that the first part

$$\int_0^1 \Pr[\delta_I(\bar{v}_I, v_{-I}) > \eta \wedge \bar{E}] d\eta \leq O\left(\sqrt[3]{\frac{m^2 \log^2 N}{d^8 \sqrt[3]{N}}}\right),$$

279 with some constructions of auxiliary events and involved probabilistic argument. And we further  
 280 tighten this bound to  $O\left(\frac{m}{d^{7/2}} \frac{\log^3 N}{\sqrt{N}}\right)$  for MHR distribution by leveraging its properties.

281 The final part of the proof is to bound  $\Pr[E]$ . For bounded distribution, we choose  $d = 1/D$ .  
 282 Since the support of the distribution is bounded by  $[1, D]$ ,  $N \cdot v_N \geq N$ , while for any  $k \leq dN$ ,  
 283  $kv_k \leq (\frac{1}{D}N)D = N \leq Nv_N$ .  $\text{ERM}^c$  therefore never chooses an index  $k \leq dN$  (recall that  
 284 in case of a tie,  $\text{ERM}^c$  picks the larger index). This implies  $\Pr[E] = \Pr[k^* \leq dN] = 0$  for  
 285 bounded distribution. For MHR distribution, we choose  $d = \frac{1}{2e}$  and show  $\Pr[E] = O(\frac{1}{N})$ . As the  
 286 corresponding proof is quite complicated, we omit it here.

## 287 4.2 Lower Bounds on $\Delta_{N,m}^{\text{worst}}$ and on the Approximate BIC Parameter, $\epsilon_1$

288 Theorem 1.3 gives an upper bound on  $\Delta_{N,m}^{\text{worst}}$  for bounded and MHR distributions and for a specific  
 289 range of  $c$ 's. Here we briefly discuss the lower bound, with details given in Appendix F.

290 Lavi et al. [26] show that for the two-point distribution  $v = 1$  and  $v = 2$ , each w.p. 0.5,  $\Delta_{N,1}^{\text{worst}} =$   
 291  $\Omega(N^{-1/2})$ , when  $c = 1/N$ . We adopt their analysis to provide a similar lower bound for  $[1, D]$ -  
 292 bounded distributions and the corresponding range of  $c$ 's. Let  $F$  be a two-point distribution where for  
 293  $X \sim F$ ,  $\Pr[X = 1] = 1 - 1/D$  and  $\Pr[X = D] = 1/D$ .

294 **Theorem 4.1.** *For the above  $F$ , for any  $c \in [\frac{m}{N}, \frac{1}{2D}]$ ,  $\text{ERM}^c$  gives  $\Delta_{N,m}^{\text{worst}} = \Omega(\frac{1}{\sqrt{N}})$  where the  
 295 constant in  $\Omega$  depends on  $D$ .*

296 Note that  $\Delta_{N,m}^{\text{worst}}$  only upper bounds the  $\epsilon_1$ -BIC parameter  $\epsilon_1$  in the two-phase model: a lower bound  
 297 on  $\Delta_{N,m}^{\text{worst}}$  does not immediately implies a lower bound on  $\epsilon_1$ . Still, a direct argument will show that  
 298 the above distribution  $F$  gives the same lower bound on  $\epsilon_1$ . For simplicity let  $K_1 = K_2 = 2$  and  
 299 suppose bidder  $i$  participates in  $m_1$  and  $m_2$  auctions in the two phases, respectively. Let  $N = T_1 K_1$   
 300 and assume  $m_1 = o(\sqrt{N})$ . Suppose the first-phase mechanism  $\mathcal{M}$  is the second price auction with  
 301 no reserve price. Then in the two-phase model with  $\text{ERM}^c$ ,  $\epsilon_1$  must be  $\Omega(\frac{m_2}{\sqrt{N}})$  to guarantee  $\epsilon_1$ -BIC.

302 It remains open to prove a lower bound for MHR distributions, and to close the gap between our  
 303  $O(N^{-1/3} \log^2 N)$  upper bound and the  $\Omega(N^{-1/2})$  lower bound for bounded distributions.

## 304 4.3 Unbounded Regular Distributions

305 Theorem 2.2 shows that, in the two-phase model, approximate incentive-compatibility and revenue  
 306 optimality can be obtained simultaneously for bounded (regular) distributions and for MHR distri-  
 307 butions. A natural question would then be: what is the largest class of value distribution we can  
 308 consider? Note that for non-regular distributions, Myerson [30] shows that revenue optimality cannot  
 309 be guaranteed by anonymous reserve price, so  $\text{ERM}$  is not a correct choice. Thus we generalize  
 310 our results to the class of regular distributions that are unbounded and not MHR. Here we provide a  
 311 sketch, with details given in Appendix G.

312 Our results can be generalized to  $\alpha$ -strongly regular distributions with  $\alpha > 0$ . As defined in [11], a  
 313 distribution  $F$  with positive density function  $f$  on its support  $[A, B]$  where  $0 \leq A \leq B \leq +\infty$  is  
 314  $\alpha$ -strongly regular if the virtual value function  $\phi(x) = x - \frac{1-F(x)}{f(x)}$  satisfies  $\phi(y) - \phi(x) \geq \alpha(y - x)$   
 315 whenever  $y > x$  (or  $\phi'(x) \geq \alpha$  if  $\phi(x)$  is differentiable). As special cases, regular and MHR  
 316 distributions are 0-strongly and 1-strongly regular distributions, respectively. For any  $\alpha > 0$ , we  
 317 obtain bounds similar to MHR distributions on  $\Delta_{N,m}^{\text{worst}}$  and on approximate incentive-compatibility  
 318 in the two-phase model and the uniform-price auction. Specifically, if  $F$  is  $\alpha$ -strongly regular then  
 319  $\Delta_{N,m}^{\text{worst}} = O\left(m \frac{\log^3 N}{\sqrt{N}}\right)$ , if  $m = o(\sqrt{N})$  and  $\frac{m}{N} \leq \left(\frac{\log N}{N}\right)^{1/3} \leq c \leq \frac{\alpha^{1/(1-\alpha)}}{4}$ .

320 It remains an open problem for future research whether  $\text{ERM}^c$  is incentive-compatible in the large  
 321 for regular but not  $\alpha$ -strongly regular distributions for any  $\alpha > 0$ . For these distributions the choice  
 322 of  $c$  must be more sophisticated since it creates a clash between approximate incentive-compatibility  
 323 and approximate revenue optimality. Intuitively, a large  $c$  (for example, a constant) will hurt revenue  
 324 optimality and a too small  $c$  will hurt incentive-compatibility. In Appendix G, we provide examples  
 325 and proofs to formally illustrate such a fact, and further discuss our conjecture that some intermediate  
 326  $c$  can maintain the balance between incentive-compatibility and revenue optimality.



## 327 **Broader Impact**

328 This work is mainly theoretical. It provides some intuitions and guidelines for potential practice, but  
329 does not have immediate societal consequences. A possible positive consequence is: the auction we  
330 consider uses an anonymous reserve price, while most of the related works on repeated auctions use  
331 unfair personalized prices. We do not see negative consequences.

## 332 **References**

- 333 [1] Jacob D Abernethy, Rachel Cummings, Bhuvish Kumar, Sam Taggart, and Jamie H Morgenstern. Learn-  
334 ing Auctions with Robust Incentive Guarantees. In *Advances in Neural Information Processing Sys-*  
335 *tems 32*, pages 11587–11597. Curran Associates, Inc., 2019. URL [http://papers.nips.cc/paper/](http://papers.nips.cc/paper/9334-learning-auctions-with-robust-incentive-guarantees.pdf)  
336 [9334-learning-auctions-with-robust-incentive-guarantees.pdf](http://papers.nips.cc/paper/9334-learning-auctions-with-robust-incentive-guarantees.pdf).
- 337 [2] Kareem Amin, Afshin Rostamizadeh, and Umar Syed. Learning prices for repeated auctions with strategic  
338 buyers. In *Advances in Neural Information Processing Systems*, pages 1169–1177, 2013.
- 339 [3] Kareem Amin, Afshin Rostamizadeh, and Umar Syed. Repeated contextual auctions with strategic buyers.  
340 In *Advances in Neural Information Processing Systems*, pages 622–630, 2014.
- 341 [4] Eduardo M Azevedo and Eric Budish. Strategy-proofness in the large. *The Review of Economic Studies*,  
342 86(1):81–116, 2018.
- 343 [5] Moshe Babaioff, Yannai A. Gonczarowski, Yishay Mansour, and Shay Moran. Are two (samples) really  
344 better than one? In *Proceedings of the 2018 ACM Conference on Economics and Computation*, EC '18,  
345 pages 175–175, New York, NY, USA, 2018. ACM. ISBN 978-1-4503-5829-3. doi: 10.1145/3219166.  
346 3219187. URL <http://doi.acm.org/10.1145/3219166.3219187>.
- 347 [6] Maria-Florina Balcan, Avrim Blum, Jason D Hartline, and Yishay Mansour. Reducing mechanism design  
348 to algorithm design via machine learning. *Journal of Computer and System Sciences*, 74(8):1245–1270,  
349 2008.
- 350 [7] Avrim Blum and Jason D Hartline. Near-optimal online auctions. In *Proceedings of the sixteenth annual*  
351 *ACM-SIAM symposium on Discrete algorithms*, pages 1156–1163. Society for Industrial and Applied  
352 Mathematics, 2005.
- 353 [8] Mark Braverman, Jieming Mao, Jon Schneider, and Matt Weinberg. Selling to a no-regret buyer. In  
354 *Proceedings of the 2018 ACM Conference on Economics and Computation*, pages 523–538. ACM. ISBN  
355 978-1-4503-5829-3. doi: 10.1145/3219166.3219233. URL [https://dl.acm.org/doi/10.1145/](https://dl.acm.org/doi/10.1145/3219166.3219233)  
356 [3219166.3219233](https://dl.acm.org/doi/10.1145/3219166.3219233).
- 357 [9] Sebastien Bubeck, Nikhil R Devanur, Zhiyi Huang, and Rad Niazadeh. Online auctions and multi-scale  
358 online learning. In *Proceedings of the 2017 ACM Conference on Economics and Computation*, pages  
359 497–514. ACM, 2017.
- 360 [10] Nicolo Cesa-Bianchi, Claudio Gentile, and Yishay Mansour. Regret minimization for reserve prices in  
361 second-price auctions. *IEEE Transactions on Information Theory*, 61(1):549–564, 2015.
- 362 [11] Richard Cole and Tim Roughgarden. The sample complexity of revenue maximization. *symposium on the*  
363 *theory of computing*, pages 243–252, 2014.
- 364 [12] Yuan Deng, Sébastien Lahaie, and Vahab Mirrokni. A Robust Non-Clairvoyant Dynamic  
365 Mechanism for Contextual Auctions. In *Advances in Neural Information Processing Systems*  
366 *32*, pages 8654–8664. Curran Associates, Inc., 2019. URL [http://papers.nips.cc/paper/](http://papers.nips.cc/paper/9071-a-robust-non-clairvoyant-dynamic-mechanism-for-contextual-auctions.pdf)  
367 [9071-a-robust-non-clairvoyant-dynamic-mechanism-for-contextual-auctions.pdf](http://papers.nips.cc/paper/9071-a-robust-non-clairvoyant-dynamic-mechanism-for-contextual-auctions.pdf).
- 368 [13] Nikhil R. Devanur, Yuval Peres, and Balasubramanian Sivan. Perfect bayesian equilibria in repeated sales.  
369 In *Proceedings of the Twenty-Sixth Annual ACM-SIAM Symposium on Discrete Algorithms*, SODA '15,  
370 pages 983–1002. Society for Industrial and Applied Mathematics. event-place: San Diego, California.
- 371 [14] Nikhil R Devanur, Zhiyi Huang, and Christos-Alexandros Psomas. The sample complexity of auctions  
372 with side information. In *Proceedings of the forty-eighth annual ACM symposium on Theory of Computing*,  
373 pages 426–439. ACM, 2016.
- 374 [15] Peerapong Dhangwatnotai, Tim Roughgarden, and Qiqi Yan. Revenue maximization with a single sample.  
375 *Games and Economic Behavior*, 91:318–333, 2015.

- 376 [16] Alessandro Epasto, Mohammad Mahdian, Vahab Mirrokni, and Song Zuo. Incentive-aware learning  
377 for large markets. In *Proceedings of the 2018 World Wide Web Conference on World Wide Web*, pages  
378 1369–1378. International World Wide Web Conferences Steering Committee, 2018.
- 379 [17] Andrew V Goldberg, Jason D Hartline, Anna R Karlin, Michael Saks, and Andrew Wright. Competitive  
380 auctions. *Games and Economic Behavior*, 55(2):242–269, 2006.
- 381 [18] Negin Golrezaei, Adel Javanmard, and Vahab Mirrokni. Dynamic Incentive-Aware Learning:  
382 Robust Pricing in Contextual Auctions. In *Advances in Neural Information Processing Systems*  
383 32, pages 9756–9766. Curran Associates, Inc., 2019. URL [http://papers.nips.cc/paper/  
384 9169-dynamic-incentive-aware-learning-robust-pricing-in-contextual-auctions.  
385 pdf](http://papers.nips.cc/paper/9169-dynamic-incentive-aware-learning-robust-pricing-in-contextual-auctions.pdf).
- 386 [19] Yannai A Gonczarowski and S Matthew Weinberg. The sample complexity of up-to- $\epsilon$  multi-dimensional  
387 revenue maximization. In *2018 IEEE 59th Annual Symposium on Foundations of Computer Science*  
388 (*FOCS*), pages 416–426. IEEE, 2018.
- 389 [20] Chenghao Guo, Zhiyi Huang, and Xinzhi Zhang. Settling the sample complexity of single-parameter  
390 revenue maximization. In *Proceedings of the 51st Annual ACM SIGACT Symposium on Theory of*  
391 *Computing*, pages 662–673. ACM, 2019.
- 392 [21] Jason Hartline and Samuel Taggart. Sample complexity for non-truthful mechanisms. In *Proceedings of*  
393 *the 20th ACM Conference on Economics and Computation*, pages 399–416. ACM, 2019.
- 394 [22] Jason Hartline, Vahab Mirrokni, and Mukund Sundararajan. Optimal marketing strategies over social  
395 networks. In *Proceedings of the 17th international conference on World Wide Web*, pages 189–198. ACM,  
396 2008.
- 397 [23] Zhiyi Huang, Yishay Mansour, and Tim Roughgarden. Making the most of your samples. *SIAM Journal*  
398 *on Computing*, 47(3):651–674, 2018.
- 399 [24] Nicole Immorlica, Brendan Lucier, Emmanouil Pountourakis, and Samuel Taggart. Repeated sales with  
400 multiple strategic buyers. In *Proceedings of the 2017 ACM Conference on Economics and Computation*,  
401 pages 167–168. ACM, 2017.
- 402 [25] Yash Kanoria and Hamid Nazerzadeh. Incentive-compatible learning of reserve prices for repeated auctions.  
403 In *Companion Proceedings of The 2019 World Wide Web Conference*, pages 932–933. ACM, 2019.
- 404 [26] Ron Lavi, Or Sattath, and Aviv Zohar. Redesigning bitcoin’s fee market. In *The World Wide Web*  
405 *Conference*, pages 2950–2956. ACM, 2019.
- 406 [27] Jinyan Liu, Zhiyi Huang, and Xiangning Wang. Learning optimal reserve price against non-myopic bidders.  
407 In *Advances in Neural Information Processing Systems*, pages 2042–2052, 2018.
- 408 [28] Andres M Medina and Mehryar Mohri. Learning theory and algorithms for revenue optimization in second  
409 price auctions with reserve. In *Proceedings of the 31st International Conference on Machine Learning*  
410 (*ICML-14*), pages 262–270, 2014.
- 411 [29] Jamie H Morgenstern and Tim Roughgarden. On the pseudo-dimension of nearly optimal auctions. In  
412 *Advances in Neural Information Processing Systems*, pages 136–144, 2015.
- 413 [30] Roger B Myerson. Optimal auction design. *Mathematics of operations research*, 6(1):58–73, 1981.
- 414 [31] Andrew Chi-Chih Yao. An incentive analysis of some bitcoin fee design. *arXiv preprint arXiv:1811.02351*,  
415 2018.

## 416 A Useful Facts

417 In this section we present some facts about  $\text{ERM}^c$  and incentive-awareness measures, some definitions about  
418 value distributions, and some useful lemmas that will be used throughout.

### 419 A.1 Facts about $\text{ERM}^c$ and Incentive-Awareness Measures

420 **Claim A.1.** Let  $P = \text{ERM}^c$ , where  $c \geq \frac{m}{N}$ . For any  $v_I \in \mathbb{R}_+^m$ ,  $v_{-I} \in \mathbb{R}_+^{N-m}$ , let  $\bar{v}_I$  denote  $m$  values such  
421 that  $\min \bar{v}_I \geq \max v_{-I}$ . Then we have  $P(\bar{v}_I, v_{-I}) \geq P(v_I, v_{-I})$ .

422 *Proof.* Let  $\bar{v} := \max v_{-I}$  be the largest value in  $v_{-I}$  and  $\bar{v}_I$  be  $m$  copies of  $\bar{v}$ . It suffices to show that  
423  $P(\bar{v}_I, v_{-I}) \geq P(v_I, v_{-I})$  since  $P = \text{ERM}^c$  ignores the largest  $m$  samples, given  $cN \geq m$ . If  $v_i \geq \bar{v}$  for each  
424  $i \in I$ , then we have  $P(\bar{v}_I, v_{-I}) = P(v_I, v_{-I})$  directly. If there exists some  $i \in I$  such that  $v_i < \bar{v}$ , then we  
425 increase  $v_i$  to  $\bar{v}$  and show that for any such  $i$  and  $(v_i, v_{-i})$ ,  $P(\bar{v}, v_{-i}) \geq P(v_i, v_{-i})$ . Let  $v' = P(v_i, v_{-i})$ , then  
426 one can verify (assuming  $\text{ERM}^c$  picks the smaller value when there are ties) that (1)  $P(v', v_{-i}) = P(v_i, v_{-i})$ ,  
427 and (2)  $P(v', v_{-i}) \leq P(\bar{v}, v_{-i})$ , implying  $P(\bar{v}, v_{-i}) \geq P(v_i, v_{-i})$ .  $\square$

428 **Claim A.2.** Let  $P = \text{ERM}^c$ , where  $c \geq \frac{m}{N}$ . For any  $v_I \in \mathbb{R}_+^m$ ,  $v_{-I} \in \mathbb{R}_+^{N-m}$ , let  $\bar{v}_I$  be any  $m$  values that are  
429 greater than or equal to the maximal value in  $v_{-I}$ . Then  $\delta_m^{\text{worst}}(v_{-I}) = \delta_I(\bar{v}_I, v_{-I})$ .

430 *Proof.* Recall the definition

$$\delta_m^{\text{worst}}(v_{-I}) = \sup_{v_I \in \mathbb{R}_+^m} \delta_I(v_I, v_{-I}) = \sup_{v_I \in \mathbb{R}_+^m} \left\{ 1 - \frac{\inf_{b_I \in \mathbb{R}_+^m} \text{ERM}^c(b_I, v_{-I})}{\text{ERM}^c(v_I, v_{-I})} \right\}.$$

431 Claim A.1 immediately implies  $\delta_m^{\text{worst}}(v_{-I}) = \lim_{v_I \rightarrow +\infty} \delta_I(v_I, v_{-I})$ . Moreover, since  $\text{ERM}^c$  ignores the  
432 highest  $cN \geq m$  values, we have  $\text{ERM}^c(\bar{v}_I, v_{-I}) = \text{ERM}^c(\bar{v}'_I, v_{-I})$  as long as both  $\bar{v}_I$  and  $\bar{v}'_I$  are greater than  
433 or equal to  $\max v_{-I}$ , no matter what they are exactly. Thus  $\delta_m^{\text{worst}}(v_{-I}) = \delta_I(\bar{v}_I, v_{-I}) = \delta_I(\bar{v}'_I, v_{-I})$ .  $\square$

434 Therefore, we will use  $\bar{v}_I$  to denote any  $m$  values that are greater than or equal to  $\max v_{-I}$ , for example,  $m$   
435 copies of  $\max v_{-I}$  or  $m$  copies of “ $+\infty$ ”. We always have  $\delta_m^{\text{worst}}(v_{-I}) = \delta_I(\bar{v}_I, v_{-I})$ .

### 436 A.2 Quantiles and Revenue Curves of Value Distributions

437 For a distribution  $F(v)$ , define the *quantile*  $q(v) = 1 - F(v)$  as a mapping from value space to quantile space.  
438 Inversely,  $v(q) = q^{-1}(v) = F^{-1}(1 - q)$  is the mapping from quantile space to value space (i.e., w.p.  $q$  a buyer's  
439 value will be at least  $v(q)$ ). Define the *revenue curve*  $R(q) = qv(q)$  as the expected revenue for the seller by  
440 posting price  $v(q)$ . Let  $R^* = \max_q \{R(q)\}$  denote the optimal revenue the seller can obtain with one bidder,  
441 and  $q^* = \arg \max_q R(q)$ ,  $v^* = v(q^*)$ . When there are several i.i.d. bidders with a regular value distribution,  $v^*$   
442 is the optimal reserve price in a second price auction, and such an auction is revenue optimal [30]. Any bounded  
443 distribution satisfies  $q^* \geq \frac{1}{D}$  because for any  $q < \frac{1}{D}$ ,  $qv(q) \leq qD < 1 \leq 1v(1) \leq R^*$ . Any MHR distribution  
444 has a unique  $q^*$  and  $q^* \geq \frac{1}{e}$  [22].

### 445 A.3 Concentration Inequality

446 For a distribution  $F$ , draw  $N$  samples and sort them non-increasingly,  $v_1 \geq v_2 \geq \dots \geq v_N$ . Let  $q_j = q(v_j)$   
447 denote their quantiles. The ratio  $j/N$  is the *empirical quantile* of value  $v_j$  since  $j/N$  is the quantile of  $v_j$  in the  
448 uniform distribution over  $\{v_1, \dots, v_N\}$ . The following concentration inequality shows that for each value  $v_j$ ,  
449 its empirical quantile  $j/N$  is close to its true quantile  $q_j$  with high probability, when  $m$  samples are fixed to be  
450  $+\infty$  while other  $N - m$  samples are i.i.d. drawn from  $F$ .

451 **Lemma A.3.** Draw  $N - m$  i.i.d. samples from a distribution  $F$ , and fix  $m$  samples to be  $+\infty$ . Sort these  
452 samples non-increasingly:  $+\infty = v_1 = \dots = v_m > v_{m+1} \geq \dots \geq v_N$ . With probability at least  $1 - \delta$  over  
453 the random draw of samples, we have for any  $j > m$ ,

$$\left| q_j - \frac{j}{N} \right| \leq \sqrt{\frac{2 \ln(2(N - m)\delta^{-1})}{N - m}} + \frac{\ln(2(N - m)\delta^{-1})}{N - m} + \frac{m}{N}.$$

454 *Proof.* The value  $v_j$  ( $j > m$ ) is the  $(j - m)$ th largest value in  $N - m$  i.i.d. samples from  $F$ , by using  
455 Bernstein inequality (see e.g., Lemma 5 in Guo et al. [20]), we know that with probability at least  $1 - \delta$ ,

456  $\left| q_j - \frac{j - m}{N - m} \right| \leq \sqrt{\frac{2 \ln(2(N - m)\delta^{-1})}{N - m}} + \frac{\ln(2(N - m)\delta^{-1})}{N - m}$ . Also note that  $\left| \frac{j}{N} - \frac{j - m}{N - m} \right| = \frac{(N - j)m}{N(N - m)} < \frac{m}{N}$ . By  
457 triangular inequality,  $\left| q_j - \frac{j}{N} \right| \leq \sqrt{\frac{2 \ln(2(N - m)\delta^{-1})}{N - m}} + \frac{\ln(2(N - m)\delta^{-1})}{N - m} + \frac{m}{N}$ .  $\square$

## 458 **B Main Proof: Upper Bounds on Incentive-Awareness Measures**

### 459 **B.1 Proof of Theorem 1.3**

460 Recall the setting of Definition 1.2: we draw  $N$  i.i.d. values  $v_1, \dots, v_N$  from  $F$ , and we have an additional  
 461 parameter  $m$  which is the number of bids that can be changed in the input of the price learning function.  
 462 Theorem 1.3 then states an upper bound on  $\Delta_{N,m}^{\text{worst}}$  for  $P = \text{ERM}^c$ . For bounded distributions, the theorem  
 463 follows immediately from the next lemma which is our main technical lemma. Note that this lemma is useful  
 464 in establishing the bound on  $\Delta_{N,m}^{\text{worst}}$  not only for bounded distributions but also for all other distributions.  
 465 Throughout, we assume that  $v_1, \dots, v_N$  are sorted, so that  $v_1 \geq \dots \geq v_N$ .

466 **Lemma B.1** (Main Lemma). *Suppose  $m = o(\sqrt{N})$ . Let  $d$  be a constant,  $0 < d < 1$ . Suppose  $\frac{m}{N} \leq c \leq \frac{d}{2}$ .  
 467 Let  $E$  be the event that the index  $k^* = \arg \max_{i > cN} \{v_i\}$  (which is the index selected by  $\text{ERM}^c$ ) satisfies  
 468  $k^* \leq dN$ . For any non-negative distribution  $F$ ,*

$$\Delta_{N,m}^{\text{worst}} \leq O\left(\sqrt[3]{\frac{m^2 \log^2 N}{d^8}} \frac{1}{\sqrt[3]{N}}\right) + \Pr[E],$$

469 where the probability in  $\Pr[E]$  is taken over the random draw of  $N - m$  i.i.d. samples from  $F$ , with other  $m$   
 470 samples fixed to be  $+\infty$ .

471 To see that this lemma immediately implies the theorem for bounded distribution, choose  $d = 1/D$ . Since the  
 472 support of the distribution is bounded by  $[1, D]$ ,  $N \cdot v_N \geq N$  while for any  $k \leq dN$ ,

$$kv_k \leq \left(\frac{1}{D}N\right)D = N \leq Nv_N.$$

473  $\text{ERM}^c$  therefore never chooses an index  $k \leq dN$  (recall that in case of a tie,  $\text{ERM}^c$  picks the larger index).  
 474 This implies  $\Pr[E] = \Pr[k^* \leq dN] = 0$  and we have the bound in the theorem.

475 *Remark.* For MHR distributions, Lemma D.5 shows that  $\Pr[E] = O\left(\frac{1}{N}\right)$  if we choose  $d = \frac{1}{2e}$ , so Lemma B.1  
 476 already gives an upper bound on  $\Delta_{N,m}^{\text{worst}}$ . However, we can use some additional properties of MHR distributions  
 477 to strengthen the bound on the first term in the main lemma to  $O\left(\frac{m}{d^{7/2}} \frac{\log^3 N}{\sqrt{N}}\right)$ , as explained in Appendix D.3.

### 478 **B.2 Proof of the Main Lemma (Lemma B.1)**

479 Let  $\bar{v}_I$  be any  $m$  values that are greater than the maximal value in  $v_{-I}$ . By Claim A.2,  $\delta_m^{\text{worst}}(v_{-I}) =$   
 480  $\delta_I(\bar{v}_I, v_{-I})$ . Thus,

$$\begin{aligned} \Delta_{N,m}^{\text{worst}} &= \mathbb{E}[\delta_m^{\text{worst}}(v_{-I})] = \mathbb{E}[\delta_I(\bar{v}_I, v_{-I})] = \int_0^1 \Pr[\delta_I(\bar{v}_I, v_{-I}) > \eta] d\eta \\ &\leq \int_0^1 (\Pr[\delta_I(\bar{v}_I, v_{-I}) > \eta \mid \bar{E}] \Pr[\bar{E}] + \Pr[E]) d\eta \\ &= \int_0^1 \Pr[\delta_I(\bar{v}_I, v_{-I}) > \eta \wedge \bar{E}] d\eta + \Pr[E], \end{aligned} \quad (3)$$

481 where  $\bar{E}$  denotes the complement of  $E$ . Then the main effort is to upper-bound  $\Pr[\delta_I(\bar{v}_I, v_{-I}) > \eta \wedge \bar{E}]$ . After  
 482 the random draw of  $v_{-I}$ , we sort all values non-increasingly, denoted by  $\bar{v}_1 = \dots = \bar{v}_m \geq v_{m+1} \geq \dots \geq v_N$ ,  
 483 and let  $\bar{q}_1 = \dots = \bar{q}_m \leq q_{m+1} \leq \dots \leq q_N$  be their quantiles, where  $q_j = q(v_j)$ . We use a concentration  
 484 inequality (Lemma A.3) to argue that for each value  $v_j$ , its empirical quantile  $j/N$  should be close to its true  
 485 quantile  $q_j$  with high probability, as follows:

486 **Claim B.2.** *Define event Conc:*

$$\text{Conc} = \left[ \forall j > m, \left| q_j - \frac{j}{N} \right| \leq 2\sqrt{\frac{4 \ln(2(N-m))}{N-m}} + \frac{m}{N} \right],$$

487 then  $\Pr[\overline{\text{Conc}}] \leq \frac{1}{N-m}$ , where the probability is over the random draw of the  $N - m$  samples  $v_{-I}$ .

488 *Proof.* Set  $\delta = \frac{1}{N-m}$  in Lemma A.3. □

489 Now, define  $G(\eta) = \Pr[\delta_I(\bar{v}_I, v_{-I}) > \eta \wedge \bar{E} \wedge \text{Conc}]$  for  $0 \leq \eta \leq 1$ . We have

$$\Pr[\delta_I(\bar{v}_I, v_{-I}) > \eta \wedge \bar{E}] \leq G(\eta) + \frac{1}{N-m}. \quad (4)$$

490 **Lemma B.3.** *There exists a constant  $C = \Theta\left(\frac{m \log^3 N}{d^4 \sqrt{N}}\right)$  such that  $\eta > C^{2/3} \Rightarrow G(\eta) \leq \frac{C}{\eta^{3/2}}$ .*

491 Finally we upper-bound the integral in (3):

$$\begin{aligned}
\int_0^1 \Pr[\delta_I(\bar{v}_I, v_{-I}) > \eta \wedge \bar{\mathbb{E}}] d\eta &\leq \int_0^1 \left( G(\eta) + \frac{1}{N-m} \right) d\eta && \text{By (4)} \\
&\leq \int_0^{C^{2/3}} 1 d\eta + \int_{C^{2/3}}^1 \frac{C}{\eta^{3/2}} d\eta + \frac{1}{N-m} && \text{By Lemma B.3} \\
&\leq 3C^{2/3} + \frac{1}{N-m} = O\left(\sqrt[3]{\frac{m^2 \log^6 N}{d^8 N}}\right) + \frac{1}{N-m} = O\left(\sqrt[3]{\frac{m^2 \log^2 N}{d^8 \sqrt[3]{N}}}\right),
\end{aligned}$$

492 which, together with (3), concludes the proof of Lemma B.1.

### 493 B.3 Proof of Lemma B.3

494 Recall that we need to upper-bound  $G(\eta) = \Pr[\delta_I(\bar{v}_I, v_{-I}) > \eta \wedge \bar{\mathbb{E}} \wedge \text{Conc}]$  by  $\Theta\left(\frac{m \log^3 N}{d^4 \sqrt{N}} \frac{1}{\eta^{3/2}}\right)$ . We do  
495 this via a union bound of  $M+1$  events, where  $M$  is a number to be chosen later. Each event is parameterized  
496 by  $\eta_t, \theta_t$  for  $t = 0, \dots, M$  which are chosen to satisfy the following conditions:

- 497 •  $\eta_0 = \frac{1}{2}\eta, \eta_1 = \eta, \eta_2 = 2\eta$ .
- 498 • For  $t \geq 3$ ,  $\eta_t$  can be chosen arbitrarily, as long as  $\eta_2 < \eta_3 < \dots < \eta_M < 1$ .
- 499 •  $\eta_{M+1} = 1$ .
- 500 •  $\theta_0 = 1$ , and  $\theta_t = \frac{\eta}{2\eta_{t+1}}$  for  $t = 1, \dots, M$ .

501 Define the following  $M+1$  events  $\text{Bad}(\eta_t, \theta_t)$ , where  $t = 0, \dots, M$ :

$$\text{Bad}(\eta_t, \theta_t) = \left[ \text{there exists } j \geq k^* \text{ such that } \begin{cases} v_j \leq (1 - \eta_t)v_{k^*} \\ jv_j \geq k^*v_{k^*} - \frac{m}{\theta_t}v_{k^*} \end{cases} \right] \quad (5)$$

502 The next lemma shows that the union of these events contains the event  $[\delta_I(\bar{v}_I, v_{-I}) > \eta] \wedge \bar{\mathbb{E}}$ .

503 **Lemma B.4.** *Suppose  $\frac{2m}{dN} < \eta < 1$  and that the parameters  $\eta_t, \theta_t$  satisfy the above conditions. If  $\delta_I(\bar{v}_I, v_{-I}) >$   
504  $\eta$  and  $k^* > dN$ , then there exists  $t \in \{0, \dots, M\}$  such that the event  $\text{Bad}(\eta_t, \theta_t)$  holds.*

505 The proof of this lemma is given in Appendix B.4. Moreover, the next lemma upper-bounds the probability of  
506 each of these bad events, when assuming that Conc holds as well.

507 **Lemma B.5.** *If  $\eta_t$  and  $\theta_t$  are at least  $\Omega\left(\frac{m}{d} \sqrt{\frac{\log(N-m)}{N-m}}\right)$  (for some constant in  $\Omega$  to be detailed in the proof),  
508 then  $\Pr[\text{Bad}(\eta_t, \theta_t) \wedge \bar{\mathbb{E}} \wedge \text{Conc}] = O\left(\frac{m \log^2 N}{d^4 \theta_t \sqrt{\eta_t^3 N}}\right)$ .*

509 The proof of Lemma B.5 is in Appendix B.5. Now,

$$\begin{aligned}
\Pr[\delta_I(\bar{v}_I, v_{-I}) > \eta \wedge \bar{\mathbb{E}} \wedge \text{Conc}] &\leq \sum_{t=0}^M \Pr[\text{Bad}(\eta_t, \theta_t) \wedge \bar{\mathbb{E}} \wedge \text{Conc}] && \text{Lemma B.4} \\
&= \sum_{t=0}^M O\left(\frac{m \log^2 N}{d^4 \theta_t \sqrt{\eta_t^3 N}}\right) && \text{Lemma B.5} \\
&= O\left(\frac{m \log^2 N}{d^4 \sqrt{N}} \cdot \sum_{t=0}^M \frac{\eta_{t+1}}{\eta} \frac{1}{\eta_t^{3/2}}\right) && \text{Definition of } \theta_t
\end{aligned}$$

510 Note that because  $\eta_t, \theta_t \geq \frac{\eta}{2}$ , the condition of Lemma B.5 is satisfied under the assumption that  $\eta \geq$   
511  $\Theta\left(\left(\frac{m \log^3 N}{d^4 \sqrt{N}}\right)^{2/3}\right)$  in Lemma B.3. Finally, we choose a sequence of  $\{\eta_t\}$  to make the above summation small  
512 enough:

513 **Claim B.6.** *There exist an integer  $M$  and parameters  $\eta_3, \dots, \eta_M$  that satisfy the conditions described above,*  
514 *such that*

$$\sum_{t=0}^M \frac{\eta_{t+1}}{\eta} \frac{1}{\eta_t^{3/2}} = O\left(\frac{\log \log(N-m)}{\eta^{3/2}}\right),$$

515 *assuming  $\eta = \Omega\left(\frac{m}{d} \sqrt{\frac{\log(N-m)}{N-m}}\right)$ .*

516 The proof of this claim is given in Appendix B.7. To conclude the proof,

$$\Pr[\delta_I(\bar{v}_I, v_{-I}) > \eta \wedge \bar{E} \wedge \text{Conc}] \leq O\left(\frac{m \log^2 N}{d^4 \sqrt{N}} \cdot \frac{\log \log(N-m)}{\eta^{3/2}}\right) = O\left(\frac{m \log^3 N}{d^4 \sqrt{N}} \frac{1}{\eta^{3/2}}\right).$$

517 *Remark.* This proof is inspired by a proof in Yao [31]. We improve upon that proof in two aspects: (1) Our  
518 definition of a sequence of bad events (Lemma B.4) improves upon similar single bad events defined in Yao  
519 [31] and Lavi et al. [26]; (2) Yao [31] only considers bounded and continuous distributions, while our proof  
520 works for arbitrary distributions. This is because Yao [31] works in the value space when upper-bounding the  
521 probability of bad events over the random draw of values  $v_{-I}$  (Lemma B.5), but we work in the quantile space,  
522 which circumvents the boundedness assumption and deals with discontinuity. To argue in the quantile space, we  
523 need Conc to show that  $q_j v_j$  approximates  $j v_j$  in the proof of Lemma B.5.

#### 524 **B.4 Proof of Lemma B.4**

525 Suppose  $\delta_I(\bar{v}_I, v_{-I}) > \eta$  and  $k^* > dN$ . By definition, there exist  $m$  bids  $b_I \in \mathbb{R}_+^m$  such that  
526  $\text{ERM}^c(b_I, v_{-I}) < (1-\eta)v_{k^*}$ . Without loss of generality, we can assume that all  $m$  bids are identical,  
527 as shown in the following claim:

528 **Claim B.7.** *For any sorted  $v = (v_1 \geq \dots \geq v_N)$ . Let  $I = \{1, \dots, m\}$ , let*

$$b^* = \arg \min_{b \in \mathbb{R}_+} \text{ERM}^c(\overbrace{b, \dots, b}^{m \text{ copies}}, v_{-I}).$$

529 *then  $b^* = \text{ERM}^c(b^*, \dots, b^*, v_{-I}) = \min_{b_I \in \mathbb{R}_+^m} \text{ERM}^c(b_I, v_{-I})$ .*

530 *Proof.* We will show that for any vector of  $m$  bids  $b_I = (b_1, \dots, b_m)$  that minimizes  $\text{ERM}^c(b_I, v_{-I})$ , we  
531 can construct another vector  $b'_I = (b, \dots, b)$  such that  $\text{ERM}^c(b'_I, v_{-I}) = \text{ERM}^c(b_I, v_{-I}) = b$ . Because  $b_I$   
532 minimizes  $\text{ERM}^c(b_I, v_{-I})$ , we can assume that there is a bid  $b_{i^*}$  such that  $\text{ERM}^c(b_I, v_{-I}) = b_{i^*}$  (otherwise,  
533 we can decrease the bids in  $b_I$  without increasing the price). Let  $b = b_{i^*}$ . For any  $b_j > b$ , decrease  $b_j$  to  $b$ , then  
534 the price does not change. For any  $b_j < b$ , increase  $b_j$  to  $b$ , then the price does not increase; and if the price  
535 decreases, then it contradicts the fact that  $\text{ERM}^c(b_I, v_{-I})$  is minimized. In this way, we change all bids in  $b_I$  to  
536  $b$ , without affecting the price.  $\square$

537 By Claim B.7, there exists  $b \in \mathbb{R}_+$  which equals  $\text{ERM}^c(b, \dots, b, v_{-I})$  and satisfies

$$b < (1-\eta)v_{k^*}. \quad (6)$$

538 Choose index  $i$  for which  $v_i \geq b > v_{i+1}$ . Assume for now  $i \leq N-1$ , we will postpone the analysis for  $i = N$   
539 to the end. Now we show that setting  $j = i$  or  $i+1$  will satisfy the lemma. Clearly  $i \geq k^*$ . The change of the  
540 bids vector caused by  $b$  is:

$$(\bar{v}_1, \dots, \bar{v}_m, v_{m+1}, \dots, v_{k^*}, \dots, v_i, v_{i+1}, \dots, v_N) \rightarrow (v_{m+1}, \dots, v_{k^*}, \dots, v_i, \overbrace{b, \dots, b}^{m \text{ times}}, v_{i+1}, \dots, v_N).$$

541 Note that  $k^* - m > dN - m \geq cN$ , so  $v_{k^*}$  will not be ignored by  $\text{ERM}^c$  after the change of bids. Then in  
542 order for  $b$  to be chosen by  $\text{ERM}^c$ , we need:

$$i \cdot b \geq (k^* - m) \cdot v_{k^*} = k^* v_{k^*} - m v_{k^*}. \quad (7)$$

543 We will choose  $j$  depending on how large  $v_i$  is:

544 (a) If  $v_i < (1 - \frac{1}{2}\eta)v_{k^*} = (1 - \eta_0)v_{k^*}$ , we set  $j = i$  and  $t = 0$ . Clearly,  $i v_i \geq i b \geq k^* v_{k^*} - m v_{k^*}$ .

545 (b) If  $v_i \geq (1 - \frac{1}{2}\eta)v_{k^*}$ , then we set  $j = i+1$  and choose the  $t$  ( $1 \leq t \leq M$ ) such that

$$(1 - \eta_t)v_{k^*} \geq v_{i+1} > (1 - \eta_{t+1})v_{k^*}. \quad (8)$$

546 To see why  $(i+1)v_{i+1} \geq k^*v_{k^*} - \frac{2\eta_{t+1}}{\eta}mv_{k^*}$  holds, first we write  $b$  as a convex combination of  $v_i$  and  
 547  $v_{i+1}$ :  $b = (1-\lambda)v_i + \lambda v_{i+1}$ . From (6) and (7), we immediately get

$$(1-\eta)v_{k^*} > (1-\lambda)v_i + \lambda v_{i+1}, \quad (9)$$

548

$$(1-\lambda)iv_i + \lambda(i+1)v_{i+1} \geq k^*v_{k^*} - mv_{k^*}. \quad (10)$$

549 Equation (10) further implies  $\lambda(i+1)v_{i+1} \geq k^*v_{k^*} - (1-\lambda)k^*v_{k^*} - mv_{k^*}$ . Divide by  $\lambda$ ,

$$(i+1)v_{i+1} \geq k^*v_{k^*} - \frac{m}{\lambda}v_{k^*}.$$

550 Then it remains to lower-bound  $\lambda$  by  $\theta_t$ . Intuitively, since  $v_i$  is larger than  $(1-\frac{\eta}{2})v_{k^*}$  but  $b < (1-\eta)v_{k^*}$ ,  
 551 the coefficient of  $v_{i+1}$  cannot be too small. Formally, from (9) and (8), we have:

$$(1-\eta)v_{k^*} > (1-\lambda)(1-\frac{1}{2}\eta)v_{k^*} + \lambda(1-\eta_{t+1})v_{k^*},$$

552

$$\implies 1-\eta > 1-\frac{1}{2}\eta - \lambda(\eta_{t+1} - \frac{1}{2}\eta)$$

553

$$\implies \lambda > \frac{\frac{1}{2}\eta}{\eta_{t+1} - \frac{1}{2}\eta} \geq \frac{\eta}{2\eta_{t+1}} = \theta_t,$$

554

concluding the proof of this case.

555 Finally we return to the analysis for  $i = N$ . If  $\frac{k^*}{N} < 1 - \frac{1}{2}\eta$ , then  $v_N \leq \frac{k^*v_{k^*}}{N} < (1 - \frac{1}{2}\eta)v_{k^*}$ , so the above  
 556 argument (a) can be reused. Otherwise, from (6) and (7), we have:

$$(1-\eta)v_{k^*} > b \geq \frac{(k^* - m)v_{k^*}}{N} \geq (1 - \frac{1}{2}\eta - \frac{m}{N})v_{k^*},$$

557 which contradicts the assumption that  $\eta > \frac{2m}{dN}$ .

## 558 B.5 Proof of Lemma B.5

559 For convenience we drop the subscript  $t$  and just write  $\eta = \eta_t, \theta = \theta_t$ . Recall that we need to upper-bound  
 560  $\Pr[\text{Bad}(\eta, \theta) \wedge \bar{\text{E}} \wedge \text{Conc}]$  where:

- 561 •  $\text{Bad}(\eta, \theta)$  implies that there exists  $j \geq k^*$  such that  $v_j \leq (1-\eta)v_{k^*}$  and  $qv_j \geq k^*v_{k^*} - \frac{m}{\theta}v_{k^*}$ .
- 562 •  $\bar{\text{E}}$  is  $k^* \geq dN$ .
- 563 •  $\text{Conc}$  requires that  $|q_j - \frac{j}{N}| \leq 2\sqrt{\frac{4\ln(2(N-m))}{N-m}} + \frac{m}{N}$  for any  $j > m$ .

564 Define

$$H = \frac{m}{d\theta - \frac{m}{N}} \quad \text{and} \quad h = \frac{1}{2} \left( d\eta - 4\sqrt{\frac{4\ln(2(N-m))}{N-m}} - \frac{4m}{N\theta} \right).$$

565 Assume  $H, h > 0$ , which can be satisfied when  $\eta$  and  $\theta$  are at least  $\Omega\left(\frac{m}{d}\sqrt{\frac{\log(N-m)}{N-m}}\right)$ .

566 **Claim B.8.** *The event  $[\text{Bad}(\eta, \theta) \wedge \bar{\text{E}} \wedge \text{Conc}]$  implies that there exists  $j \geq k^*$  which satisfies:*

- 567 1.  $qv_j \leq k^*v_{k^*} \leq (j+H)v_j$ ;
- 568 2.  $q_j - q_{k^*} \geq 2h$ .

569 *Proof of Claim B.8.* Choose the  $j$  in  $\text{Bad}(\eta, \theta)$  which satisfies  $qv_j \geq k^*v_{k^*} - \frac{m}{\theta}v_{k^*}$ . To see why the first  
 570 inequality holds, note that  $dNv_{k^*} \leq k^*v_{k^*} \leq jv_j + \frac{m}{\theta}v_{k^*} \leq Nv_j + \frac{m}{\theta}v_{k^*}$ , subtracting the first and forth  
 571 term, we get  $(dN - \frac{m}{\theta})v_{k^*} \leq Nv_j$ , further implying  $k^*v_{k^*} \leq jv_j + \frac{m}{\theta} \frac{Nv_j}{(dN - m/\theta)}$ , which is the first inequality.

572 Now consider the second inequality. Since  $\text{Bad}(\eta, \theta)$  requires  $qv_j \geq k^*v_{k^*} - \frac{m}{\theta}v_{k^*}$  and  $v_j \leq (1-\eta)v_{k^*}$ , we  
 573 have

$$j \geq \frac{k^*v_{k^*} - \frac{m}{\theta}v_{k^*}}{(1-\eta)v_{k^*}} = \frac{k^* - \frac{m}{\theta}}{1-\eta} \geq (k^* - \frac{m}{\theta})(1+\eta) = k^* + k^*\eta - \frac{m}{\theta}(1+\eta) \geq k^* + dN\eta - 2\frac{m}{\theta},$$

574 and dividing by  $N$ ,

$$\frac{j}{N} - \frac{k^*}{N} \geq d\eta - 2\frac{m}{N\theta}.$$

575 Using the condition Conc on  $j$  and  $k^*$ , we can derive the relationship between  $q_j$  and  $q_{k^*}$  by simple calculation:

$$q_j - q_{k^*} \geq \left(d\eta - 2\frac{m}{N\theta}\right) - 2\left(2\sqrt{\frac{4\ln(2(N-m))}{N-m}} + \frac{m}{N}\right) \geq 2h.$$

576 □

577 Divide the quantile space  $[0, 1]$  into  $[0, d/2]$  and  $(1 - d/2)/h$  equal-length intervals with length  $h$ ,

$$[0, 1] = [0, \frac{d}{2}] \cup I_1 \cup I_2 \cup \dots \cup I_{\frac{1-d/2}{h}}, \quad (11)$$

578 where  $I_l = (d/2 + (l-1)h, d/2 + lh]$ . Thus a uniformly random draw of quantile falls into  $I_l$  with probability  
579  $h$ . Define  $i_l^*$  and  $i_{<(l+1)}^*$ :

$$i_l^* = \arg \max_{i > cN} \{iv_i \mid q_i \in I_l\} \text{ or } i_l^* = \emptyset \text{ if there is no such } i.$$

580

$$i_{<(l+1)}^* = \arg \max_{i > cN} \{iv_i \mid q_i \in I_1 \cup \dots \cup I_l\} \text{ or } i_{<(l+1)}^* = \emptyset \text{ if there is no such } i.$$

581 And  $A_l \stackrel{\text{def}}{=} i_l^* v_{i_l^*}$ ,  $A_{<(l+1)} \stackrel{\text{def}}{=} i_{<(l+1)}^* v_{i_{<(l+1)}^*}$ . Moreover, define event  $W_l$  for each  $l$ ,

$$W_l = [\{i_{l+2}^* \neq \emptyset\} \wedge \{i_{<(l+1)}^* \neq \emptyset\} \wedge \{A_{l+2} \leq A_{<(l+1)} \leq A_{l+2} + H\tilde{v}_{l+2}\}],$$

582 where  $\tilde{v}_{l+2} \stackrel{\text{def}}{=} v(d/2 + (l+1)h)$  is the upper bound on the values with quantiles in  $I_{l+2}$ . We argue that if  
583 the event  $[\text{Bad}(\eta, \theta) \wedge \bar{\text{E}} \wedge \text{Conc}]$  holds then there must exist an index  $l$  such that  $W_l$  holds. To see this,  
584 consider the index  $j$  that is promised to exist in  $\text{Bad}(\eta, \theta)$  and choose the index  $l$  such that  $q_j \in I_{l+2}$ . Note that  
585  $[\bar{\text{E}} \wedge \text{Conc}]$  implies  $q_j \geq q_{k^*} > d/2$ , so both  $q_j$  and  $q_{k^*}$  must fall in  $I_1 \cup I_2 \cup \dots$ . To see why  $W_l$  must hold,  
586 note that:

- 587 •  $A_{l+2} \leq A_{<(l+1)}$  since  $q_j - q_{k^*} > 2h$ , implying  $q_{k^*} \in I_{<(l+1)}$  and  $A_{<(l+1)} = k^* v_{k^*}$ .
- 588 •  $A_{<(l+1)} \leq A_{l+2} + H\tilde{v}_{l+2}$  since  $k^* v_{k^*} \leq (j+H)v_j \leq i_{l+2}^* v_{i_{l+2}^*} + H\tilde{v}_{l+2}$ .

589 Therefore, a union bound over  $\Pr[W_l]$  suffices to prove that  $\Pr[\text{Bad}(\eta, \theta) \wedge \bar{\text{E}} \wedge \text{Conc}]$  is small. The idea  
590 to bound  $\Pr[W_l]$  is a refinement of Yao [31]: Note that there is an interval  $I_{l+1}$  with length  $h$  between  $I_{l+2}$   
591 and  $I_{<(l+1)}$  and consider the number  $X$  of quantiles falling into  $I_{l+1}$ . There is enough randomness in  $X$  as  
592 its variance is  $\Omega(hN)$ , implying that the difference between the rankings of any pair of quantiles in  $I_{l+2}$  and  
593  $I_{<(l+1)}$  varies broadly. As a result, it's unlikely that  $A_{<(l+1)}$  will fall in the short interval  $[A_{l+2}, A_{l+2} + H\tilde{v}_{l+2}]$ .  
594 Formally, we will prove that

595 **Lemma B.9.** For any  $l$ ,  $\Pr[W_l] \leq O\left(\frac{H \log^2 N}{\sqrt{hd^3 N}}\right)$ .

596 The proof of Lemma B.9 is in Appendix B.6. To conclude,

$$\Pr[\text{Bad}(\eta, \theta) \wedge \bar{\text{E}} \wedge \text{Conc}] \leq \sum_{l=1}^{\frac{1-d/2}{h}} \Pr[W_l] \leq \frac{1}{h} O\left(\frac{H \log^2 N}{\sqrt{hd^3 N}}\right) = O\left(\frac{m \log^2 N}{d\theta \sqrt{(d\eta)^3 d^3 N}}\right),$$

597 where the last equality is because  $H = O\left(\frac{m}{d\theta}\right)$  and  $h = \Omega(d\eta)$  under the assumption that  $\eta$  and  $\theta$  are at least  
598  $\Omega\left(\frac{m}{d} \sqrt{\frac{\log(N-m)}{N-m}}\right)$ .

## 599 B.6 Proof of Lemma B.9

600 We need to upper-bound  $\Pr[W_l]$  over the random draw of  $v_{-l}$ , or in quantile space,  $q_{-l}$ , which are  $N - m$   
601 i.i.d. random draws from  $\text{Uniform}[0, 1]$ . Let  $N_L$  be the number of quantile draws that are in  $L \stackrel{\text{def}}{=} [0, d/2] \cup$   
602  $I_1 \cup \dots \cup I_{l+1}$ . Suppose we draw the quantiles in the following procedure: first determine  $N_L$ , then draw  
603  $N - m - N_L$  quantiles that are not in  $L$ ; finally draw  $N_L$  quantiles that are in  $L$ .

604 Note that  $N_L$  follows a binomial distribution, and a Chernoff bound implies that

$$\Pr[N_L \geq \frac{d}{4}(N - m)] \geq 1 - \exp\left(-\frac{d(N - m)}{16}\right). \quad (12)$$

605 We thus assume  $N_L \geq d(N - m)/4$ .



606 Then draw  $N - m - N_L$  quantiles from  $[0, 1] \setminus L$ , so  $i_{l+2}^*$ ,  $v_{i_{l+2}^*}$  and  $A_{l+2}$  are determined. Suppose  $i_{l+2}^* \neq \emptyset$ ;  
 607 otherwise,  $W_l$  does not hold.

608 Now we draw  $N_L$  quantiles,  $q^{(1)}, \dots, q^{(N_L)}$  from  $L$ . Consider the increment of  $A_{<(l+1)}$ , as a sequence  
 609  $A^{(t)}$ ,  $t = 1, \dots, N_L$ . After the time  $t - 1$  when  $A^{(t-1)} \geq A_{l+2}$ , the index  $i_{<(l+1)}^*$  is no longer  $\emptyset$ . When one  
 610 more sample  $q^{(t)}$  is generated, there are three cases:

- 611 1. If  $q^{(t)} \in [0, d/2]$ ,  $A^{(t-1)}$  increases by at least  $\tilde{v}_{l+2}$ . This is because each term  $iw_i^{(t-1)}$  increases to  
 612  $(i+1)v_i^{(t)} \geq iv_i^{(t-1)} + \tilde{v}_{l+2}$ , for any  $i$  such that  $q_i \in I_1, \dots, I_l$ .
- 613 2. If  $q^{(t)} \in I_1 \cup \dots \cup I_l$ , then  $A^{(t-1)}$  does not decrease.
- 614 3. If  $q^{(t)} \in I_{l+1}$ ,  $A^{(t-1)}$  does not change.

615 Let  $s$  be the number of quantiles that are not in  $I_{l+1}$ , and  $A^{(t_1)}, \dots, A^{(t_s)}$  be those steps, and write  $B^{(i)} \stackrel{\text{def}}{=} (A^{(t_i)} - A_{l+2})/\tilde{v}_{l+2}$  for  $i = 1, \dots, s$ . We have  $A_{<(l+1)} = \tilde{v}_{l+2}B^{(s)} + A_{l+2}$ . Then our task is to analyze the  
 616 probability that  $B^{(s)} \in [0, H]$ .  
 617

618 We can think of the generation of  $B^{(s)}$  as follows: regardless of  $s$ , first generate an infinite sequence  
 619  $B^{(1)}, B^{(2)}, \dots$ , where at each step  $i$  the value  $B^{(i)}$  is increased by 1 with probability at least  $\Pr[q \in [0, d/2] \mid$   
 620  $q \in L] \geq d/2$ . Then pick an index  $s$  by a binomial distribution  $\text{Bin}(N_L, 1 - \Pr[q \in I_{l+1} \mid q \in L])$ . Then  
 621 the  $s$ -th value in the infinite sequence  $\{B^{(i)}\}$  is chosen as  $B^{(s)}$ . Note that  $\text{Bin}(N_L, 1 - \Pr[q \in I_{l+1} \mid q \in L])$   
 622 is dominated by  $\text{Bin}(N_L, 1 - h)$ , so the probability that  $B^{(s)}$  takes on any one of the values in the sequence  
 623  $\{B^{(i)}\}$  is at most  $\Pr[s = i] = O(1/\sqrt{hN_L})$ .

624 Then we consider the length of the sub-sequence where  $B^{(i)} \in [0, H]$ . Intuitively, the expected number of steps  
 625 for  $B^{(i)}$  to increase by  $H$ , is at most  $H/(d/2)$ . The probability that it takes more than  $2H(\log N_L)^2/d$  steps  
 626 implies that the sum of  $2H(\log N_L)^2/d$  i.i.d. Bernoulli variables whose success probability is at least  $d/2$  does  
 627 not reach  $H$ , which can be bounded by a Chernoff bound:

$$\begin{aligned} \Pr[\text{Length} > \frac{2H(\log N_L)^2}{d}] &\leq \Pr[\text{Bin}\left(\frac{2H(\log N_L)^2}{d}, \frac{d}{2}\right) < H] \\ &\leq \exp\left(-\frac{1}{2}H(\log N_L)^2\left(1 - \frac{1}{(\log N_L)^2}\right)^2\right) \\ &= O\left(\exp\left(-\frac{1}{8}(\log N_L)^2\right)\right) \\ &= O\left(N_L^{-\frac{1}{8}\log N_L}\right). \end{aligned}$$

628 Assuming  $\text{Length} \leq (2H(\log N_L)^2)/d$ , the probability that  $B^{(s)} \in [0, H]$  can be bounded by a union bound:

$$\sum_{i: B^{(i)} \in [0, H]} \Pr[s = i] \leq \text{Length} \cdot O\left(\frac{1}{\sqrt{hN_L}}\right) \leq O\left(\frac{H(\log N_L)^2}{d\sqrt{hN_L}}\right).$$

629 Therefore,

$$\begin{aligned} \Pr[W_l] &\leq O\left(\frac{H(\log N_L)^2}{d\sqrt{hN_L}}\right) + O\left(N_L^{-\frac{1}{8}\log N_L}\right) \\ &\leq O\left(\frac{H(\log N)^2}{d\sqrt{hdN}}\right) + \left(\frac{d}{4}(N-m)\right)^{-\frac{1}{8}\log \frac{d}{4}(N-m)} + \exp\left(-\frac{d(N-m)}{16}\right) \quad \text{By (12)} \\ &= O\left(\frac{H(\log N)^2}{\sqrt{hd^3N}}\right). \end{aligned}$$

## 630 **B.7 Proof of Claim B.6**

631 We need to show that there exist an integer  $M$  and parameters  $\eta_0 = \frac{1}{2}\eta < \eta_1 = \eta < \eta_2 = 2\eta < \eta_3 < \dots <$   
 632  $\eta_M < \eta_{M+1} = 1$ , such that

$$\sum_{t=0}^M \frac{\eta_{t+1}}{\eta} \frac{1}{\eta_t^{3/2}} = O\left(\frac{\log \log(N-m)}{\eta^{3/2}}\right).$$

633 We start with:

$$\sum_{t=0}^M \frac{\eta_{t+1}}{\eta} \frac{1}{\eta_t^{3/2}} = \frac{1}{\eta^{3/2}} \sum_{t=0}^M \frac{\eta_{t+1}/\eta}{(\eta_t/\eta)^{3/2}} = \frac{1}{\eta^{3/2}} \left( O(1) + \sum_{t=2}^M \frac{\eta_{t+1}/\eta}{(\eta_t/\eta)^{3/2}} \right) \quad (13)$$

634 Let  $\eta_{t+1}/\eta = (\eta_t/\eta)^{3/2}$  for any  $t \geq 2$ . We can recursively compute  $\eta_t$  until the maximum step  $t = M$  which  
635 satisfies  $\eta_M < 1$ . Then (13) is upper-bounded by  $\frac{1}{\eta^{3/2}}(O(1) + M)$ . By our construction of  $\{\eta_t\}$ , we have

$$\frac{\eta_M}{\eta} = \left(\frac{\eta_2}{\eta}\right)^{\frac{3}{2}M-2} = 2^{\frac{3}{2}M-2} < \frac{1}{\eta}.$$

636 Thus,

$$M < \log_{3/2} \log_2 \frac{1}{\eta} + 2 = O(\log \log \frac{1}{\eta}) = O(\log \log(N - m)),$$

637 where the last equality follows from the assumption that  $\eta = \Omega\left(\frac{m}{d} \sqrt{\frac{\log(N-m)}{N-m}}\right)$ . Thus, the summation (13)  
638 becomes

$$\sum_{t=0}^M \frac{\eta_{t+1}}{\eta} \frac{1}{\eta_t^{3/2}} = O\left(\frac{\log \log(N - m)}{\eta^{3/2}}\right).$$

639 as required.

## 640 C Missing Proofs From Section 2

### 641 C.1 Proof of Theorem 2.1 (for Bounded Distributions)

*Proof of Theorem 2.1 for bounded Distributions.* First consider the reduction of reserve price caused by the deviation of bidder  $i$ . The true values of all bidders in the first phase are  $(v_I, v_{-I})$ , where bidder  $i$ 's true values are  $v_I \in \mathbb{R}_+^{m_i, 1}$ . When other bidders bid  $v_{-I}$  truthfully, and bidder  $i$  bids  $b_I$  instead, the reserve price  $p$  changes from  $P(v_I, v_{-I})$  to  $P(b_I, v_{-I})$  and the change is at most

$$P(v_I, v_{-I}) - P(b_I, v_{-I}) \leq P(v_I, v_{-I})\delta_I(v_I, v_{-I}) \leq P(v_I, v_{-I})\delta_{m_i, 1}^{\text{worst}}(v_{-I}) \leq D\delta_{m_1}^{\text{worst}}(v_{-I}),$$

642 by Definition 1.2 and by the fact that all values are upper-bounded by  $D$ . Consider the increase of utility in the  
643 second phase. We claim that for any two possible reserve prices  $p_2 \leq p_1$ , for any  $v \in \mathbb{R}_+$ , for any  $K_2 \geq 1$ , we  
644 have

$$u^{K_2}(v, p_2) - u^{K_2}(v, p_1) \leq p_1 - p_2. \quad (14)$$

To see this, first re-write  $u^{K_2}(v, p)$  in (2) as

$$u^{K_2}(v, p) = \mathbb{E}_{X_2, \dots, X_{K_2} \sim F} [(v - \max\{p, X^*\})^+],$$

645 where  $X^* \stackrel{\text{def}}{=} \max\{X_2, \dots, X_{K_2}\}$  and  $(x)^+ \stackrel{\text{def}}{=} \max\{x, 0\}$ . Note that  $(x)^+ - (y)^+ \leq |x - y|$ , thus

$$\begin{aligned} u^{K_2}(v, p_2) - u^{K_2}(v, p_1) &= \mathbb{E} [(v - \max\{p_2, X^*\})^+ - (v - \max\{p_1, X^*\})^+] \\ &\leq \mathbb{E} [|\max\{p_1, X^*\} - \max\{p_2, X^*\}|] \leq \mathbb{E} [|p_1 - p_2|] = p_1 - p_2. \end{aligned}$$

646 For the first phase we have  $U_i^{\mathcal{M}}(\mathbf{v}_i, b_I, v_{-I}) \leq U_i^{\mathcal{M}}(\mathbf{v}_i, v_I, v_{-I})$  since  $\mathcal{M}$  is truthful. Thus, by (1) and (14)  
647 the difference in interim utilities is at most

$$\begin{aligned} &\mathbb{E}_{v_{-i}} \left[ U_i^{\text{TP}}(\mathbf{v}_i, b_I, v_{-I}) - U_i^{\text{TP}}(\mathbf{v}_i, v_I, v_{-I}) \right] \\ &\leq \mathbb{E}_{v_{-i}} \left[ U_i^{\mathcal{M}}(\mathbf{v}_i, b_I, v_{-I}) - U_i^{\mathcal{M}}(\mathbf{v}_i, v_I, v_{-I}) \right] \\ &\quad + \mathbb{E}_{v_{-i}} \left[ \sum_{t=m_{i,1}+1}^{m_{i,1}+m_{i,2}} \left[ u^{K_2}(v_{i,t}, P(b_I, v_{-I})) - u^{K_2}(v_{i,t}, P(v_I, v_{-I})) \right] \right] \\ &\leq 0 + \mathbb{E}_{v_{-i}} [m_2(P(v_I, v_{-I}) - P(b_I, v_{-I}))] \leq \mathbb{E}_{v_{-i}} [m_2 D \delta_{m_1}^{\text{worst}}(v_{-I})] = m_2 D \Delta_{T_1 K_1, m_1}^{\text{worst}}, \end{aligned}$$

648 which indicates that truthful bidding is an  $\epsilon$ -BNE, where  $\epsilon = m_2 D \Delta_{T_1 K_1, m_1}^{\text{worst}}$ . This concludes the proof for  
649 bounded distributions.  $\square$

650 *Remark.* The proof for MHR distributions is trickier since the difference  $P(v_I, v_{-I}) - P(b_I, v_{-I})$  can be  
651 unbounded. Intuitively, the probability that  $P(v_I, v_{-I})$  will be higher than  $(1 + o(1))v^*$  ( $v^*$  is defined in the  
652 statement of the lemma) is exponentially small, and the main effort is to show that the expected difference  
653  $P(v_I, v_{-I}) - P(b_I, v_{-I})$  multiplied by this exponentially small probability is negligible. Full details are given  
654 Appendix D.2.

655 **C.2 Proof of Theorem 2.2**

656 The bound on approximate truthfulness, i.e.,  $\epsilon_1$ , follows from Theorem 2.1 and Theorem 1.3, where we first  
 657 obtain the bound on  $\Delta_{T_1 K_1, m_1}^{\text{worst}}$  from Theorem 1.3 by setting  $N = T_1 K_1$  and  $m = m_1$  and then replace  $m_2 m_1$   
 658 with  $O(\bar{m}^2)$  for MHR distribution and replacing  $m_2 m_1^{2/3}$  with  $O(\bar{m}^{5/3})$  for bounded distribution.

659 It remains to consider revenue, where we will use sample complexity results to obtain the convergence rate of the  
 660 revenue loss, i.e.,  $\epsilon_2$ . Let  $rev_1, rev_2$  be the expected revenues of the two phases in  $\text{TP}(\mathcal{M}, P; \mathbf{T}, \mathbf{m}, \mathbf{K}, S)$ ,  
 661 and  $rev^*$  be the revenue obtained by using Myerson's auction in all rounds, i.e.,  $rev^* = T_1 \text{Mye}^{K_1} + T_2 \text{Mye}^{K_2}$   
 662 where  $\text{Mye}^K$  is the revenue of Myerson's auction with  $K$  i.i.d. bidders from  $F$ . For  $rev_1$ , we only have  
 663  $rev_1 \geq 0$  since we do not any revenue guarantee for the arbitrary first-phase mechanism  $\mathcal{M}$ . Now consider  
 664  $rev_2$ , let  $r^{K_2}(p)$  denote the expected revenue of a second price auction with reserve price  $p$ . Since the values in  
 665 the two phases are independent, we have

$$rev_2 = T_2 \cdot \mathbb{E}_{v_1, \dots, v_{T_1 K_1} \sim F} \left[ r^{K_2}(\text{ERM}^c(v_1, \dots, v_{T_1 K_1})) \right].$$

666 We need to compare  $r^{K_2}(\text{ERM}^c(v_1, \dots, v_{T_1 K_1}))$  with  $\text{Mye}^{K_2}$ . Since bidders have i.i.d. regular value dis-  
 667 tributions, Myerson's auction is exactly the second price auction with reserve price  $p = v^*$ . When  $K_2 = 1$ ,  
 668 Myerson's auction becomes a post-price auction. Let  $\epsilon^{\text{sample}}(\cdot)$  be the inverse function of the required number  
 669 of samples for  $\text{ERM}^c$  to guarantee  $(1 - \epsilon^{\text{sample}})$ -optimal revenue (as obtained in Huang et al. [23]) in the  
 670 posted-price auction, i.e., the expected revenue of a one-bidder auction with a posted price  $p$  determined by  
 671  $\text{ERM}^c$  with  $N$  samples is at least  $(1 - \epsilon^{\text{sample}}(N))$  times the optimal expected revenue. Then for the one-bidder  
 672 case, we have

$$rev_2 = T_2(1 - \epsilon^{\text{sample}}(T_1 K_1))\text{Mye}^1.$$

673 For general  $K_2$ , while the sample complexity literature does not analyze the revenue of the same reserve price  
 674  $p = \text{ERM}^c(v_1, \dots, v_{T_1 K_1})$  in a second price auction with  $K_2 \geq 2$  bidders, we are able to generalize the  
 675 existing revenue guarantee to the case of multiple bidders (and multiple units) under the assumption that the  
 676 distribution is regular. The generalization is made by the following lemma, which we believe is of independent  
 677 interest:

678 **Lemma C.1.** *For any regular distribution  $F$ , if the expected revenue of a posted price auction with price  $p$  and  
 679 with one bidder whose value is drawn from  $F$  is  $(1 - \epsilon)$ -optimal, then the revenue of a Vickrey auction with  
 680 reserve price  $p$  selling at most  $k \geq 1$  units of a item to  $K \geq 2$  i.i.d. unit-demand bidders with values from  $F$  is  
 681 also  $(1 - \epsilon)$ -optimal.*

682 The proof is in Appendix C.3. Thus for  $K_2 \geq 2$ , we also have:  $rev_2 = T_2(1 - \epsilon^{\text{sample}}(T_1 K_1))\text{Mye}^{K_2}$ .

683 Finally,

$$\begin{aligned} 1 - \epsilon_2 &= \frac{rev_1 + rev_2}{rev^*} \geq \frac{0 + T_2 \text{Mye}^{K_2} \cdot (1 - \epsilon^{\text{sample}}(T_1 K_1))}{T_1 \text{Mye}^{K_1} + T_2 \text{Mye}^{K_2}} \\ &\geq 1 - \frac{T_1 \text{Mye}^{K_1}}{T_1 \text{Mye}^{K_1} + T_2 \text{Mye}^{K_2}} - \epsilon^{\text{sample}}(T_1 K_1) \\ &\geq 1 - \frac{T_1}{T} - \epsilon^{\text{sample}}(T_1 K_1) \qquad (\text{Mye}^{K_2} \geq \text{Mye}^{K_1} \text{ since } K_2 \geq K_1) \end{aligned}$$

684 From Huang et al. [23], we know that for bounded distributions,  $\epsilon^{\text{sample}}(N) = O(\sqrt{\frac{D \cdot \log N}{N}})$  when  $c \leq \frac{1}{2D}$ ,  
 685 and for MHR distributions (MHR implies regularity),  $\epsilon^{\text{sample}}(N) = O([\frac{\log N}{N}]^{\frac{2}{3}})$  when  $c \leq \frac{1}{4e}$ . This implies  
 686 the bounds on  $\epsilon_2$  as stated in the theorem, and concludes the proof.

687 **C.3 Proof of Lemma C.1**

688 It's more convenient to work in the quantile space. Let  $v(q), R(q) = qv(q)$  be the value curve and revenue  
 689 curve of  $F$ . It's well-known that the derivative  $R'(q)$  equals to the virtual value  $\phi(v(q)) = v - \frac{1-F(v)}{f(v)}$  and by  
 690 Myerson's Lemma, the expected revenue with allocation rule  $x(\cdot)$  equals to the virtual surplus:

$$rev = \sum_{i=1}^K \mathbb{E}[R'(q)x_i(q)].$$

691 Let  $x^{K,k}(q)$  be the allocation to (the probability of winning of) a bidder whose value has quantile  $q$  in a  
 692 Vickrey auction selling  $k$  units to  $K$  bidders without reserve price. Specifically,  $x^{1,1}(q) = 1$ ; for general  $K$ ,

693  $x^{K,1}(q) = (1-q)^{K-1}$ ; for general  $K, k$ ,  $x^{K,k}(q) = \sum_{i=0}^{k-1} \binom{K-1}{i} q^i (1-q)^{K-1-i}$ . With reserve price  $p_0$ , let  
694  $q_0 = q(p_0)$ , then the allocation becomes  $x_{q_0}^{K,k}(q) = x^{K,k}(q)$  for  $q < q_0$  and  $x_{q_0}^{K,k}(q) = 0$  otherwise. So the  
695 revenue of  $p_0$  is

$$rev(K, k) = K \int_0^{q_0} R'(q) x^{K,k}(q) dq,$$

696 and the optimal revenue is:

$$rev^*(K, k) = K \int_0^{q^*} R'(q) x^{K,k}(q) dq,$$

697 where  $q^*$  satisfies:  $R'(q) \geq 0, \forall q \leq q^*$  and  $R'(q) \leq 0, \forall q \geq q^*$ . And define:

$$loss(K, k) = rev^*(K, k) - rev(K, k) = K \int_{q_0}^{q^*} R'(q) x^{K,k}(q) dq.$$

698 Since  $p_0$  is  $(1-\epsilon)$ -optimal with  $K=1, k=1$  (the posted-price auction), we have:

$$loss(1, 1) \leq \epsilon \cdot rev^*(1, 1).$$

699 Now for general  $K, k$ :

700 • If  $q_0 > q^*$ . The loss:

$$\begin{aligned} loss(K, k) &= K \int_{q^*}^{q_0} -R'(q) x^{K,k}(q) dq \\ &\leq K \int_{q^*}^{q_0} -R'(q) x^{K,k}(q^*) dq \\ &= K x^{K,k}(q^*) \int_{q^*}^{q_0} -R'(q) dq = K x^{K,k}(q^*) loss(1, 1), \end{aligned}$$

701 since  $x^{K,k}(q)$  is non-increasing in  $q$  (actually, the monotonicity of  $x^{K,k}(q)$  is the only property that is  
702 used throughout the proof), and the optimal revenue:

$$\begin{aligned} rev^*(K, k) &\geq K \int_0^{q^*} R'(q) x^{K,k}(q^*) dq \\ &= K x^{K,k}(q^*) \int_0^{q^*} R'(q) dq = K x^{K,k}(q^*) rev^*(1, 1), \end{aligned}$$

703 which gives:  $\frac{loss(K, k)}{rev^*(K, k)} \leq \frac{loss(1, 1)}{rev^*(1, 1)} \leq \epsilon$ .

704 • If  $q_0 < q^*$ . The loss:

$$loss(K, k) = K \int_{q_0}^{q^*} R'(q) x^{K,k}(q) dq \leq K x^{K,k}(q_0) loss(1, 1),$$

705 and the optimal revenue:

$$\begin{aligned} rev^*(K, k) &= K \int_0^{q_0} R'(q) x^{K,k}(q) dq + K \int_{q_0}^{q^*} R'(q) x^{K,k}(q) dq \\ &\geq K \int_0^{q_0} R'(q) x^{K,k}(q_0) dq + K \int_{q_0}^{q^*} R'(q) x^{K,k}(q) dq \\ &= K x^{K,k}(q_0) rev(1, 1) + loss(K, k), \end{aligned}$$

706 which gives:

$$\begin{aligned} \frac{loss(K, k)}{rev^*(K, k)} &\leq \frac{loss(K, k)}{K x^{K,k}(q_0) rev(1, 1) + loss(K, k)} = \frac{1}{\frac{K x^{K,k}(q_0) rev(1, 1)}{loss(K, k)} + 1} \\ &\leq \frac{1}{\frac{rev(1, 1)}{loss(1, 1)} + 1} \leq \frac{1}{\frac{1-\epsilon}{\epsilon} + 1} = \epsilon. \end{aligned}$$

#### 707 C.4 Perfect Bayesian Equilibrium

708 Here we consider the setting of  $T$ -round repeated auctions where each auction contains  $K \geq 1$  bidders and each  
709 bidder participates in at most  $\bar{m}$  rounds of auctions. We use  $\mathbf{v}_i = (v_i^t)$  to denote bidder  $i$ 's profile of values,

710 where  $v_i^t$  is her value at round  $t$  if she participates in that round. Similarly denote by  $\mathbf{b}_i = (b_i^t)$  the bids of  
 711 bidder  $i$ . Values are i.i.d. samples from some distribution  $F$ .

712 In repeated auctions, the seller can adjust the mechanism dynamically based on the bidding history of buyers,  
 713 and buyers can use historical information to adjust their bidding strategies. The solution concept of an  $\epsilon$ -perfect  
 714 Bayesian equilibrium ( $\epsilon$ -PBE) captures this dynamic nature. For each bidder  $i$ , we use  $h_i^t$  to denote the history  
 715 she can observe at the start of round  $t$ . For example,  $h_i^t$  includes her bid  $b_i^{t'}$ , whether she receives the item, how  
 716 much she pays, etc, at round  $t' < t$  if she participates in round  $t'$ . We assume that bidder  $i$  cannot observe the  
 717 bids in the auctions she does not participate in. We allow bidder  $i$  to anticipate her values in future rounds, so she  
 718 can make decision on her entire value profile  $\mathbf{v}_i = (v_i^t)$ . Bidder  $i$ 's strategy is thus denoted by  $\sigma_i = (\sigma_i^t)$  where  
 719  $\sigma_i^t$  maps  $\mathbf{v}_i$  and  $h_i^t$  to a bid  $b_i^t = \sigma_i^t(\mathbf{v}_i, h_i^t)$ . Let  $U_i^{[t:T]}(\sigma; \mathbf{v}_i, h_i^t)$  be the total expected utility of bidder  $i$  in  
 720 rounds  $t, t+1, \dots, T$ , given her value profile  $\mathbf{v}_i$ , the history  $h_i^t$  at round  $t$ , and bidders playing  $\sigma = (\sigma_i, \sigma_{-i})$ .

721 **Definition C.2.** A profile of strategy  $\sigma = (\sigma_i, \sigma_{-i})$  is an  $\epsilon$ -perfect Bayesian equilibrium ( $\epsilon$ -PBE) if for each  
 722 bidder  $i$ , each round  $t$ , any history  $h_i^t$ , any values  $\mathbf{v}_i$ , the strategy  $\sigma_i$  approximately maximizes bidder  $i$ 's  
 723 expected utility from round  $t$  to round  $T$  up to  $\epsilon$  error, i.e.,  $U_i^{[t:T]}(\sigma; \mathbf{v}_i, h_i^t) \geq U_i^{[t:T]}(\sigma'_i, \sigma_{-i}; \mathbf{v}_i, h_i^t) - \epsilon$  for  
 724 any alternative strategy  $\sigma'_i$ .

725 **Definition C.3.** The seller's mechanism (or auction learning algorithm) is  $\epsilon$ -perfect Bayesian incentive-  
 726 compatible ( $\epsilon$ -PBIC) if truthful bidding (i.e.,  $\sigma_i^t(\mathbf{v}_i, h_i^t) = v_i^t$ ) is an  $\epsilon$ -PBE.

727 We emphasize that the expected utility  $U_i^{[t:T]}(\sigma; \mathbf{v}_i, h_i^t)$  is conditioned on  $h_i^t$ . This is because, the history  $h_i^t$   
 728 which includes the allocation of item and the payment of bidder  $i$  can leak information about other bidders' bids  
 729 (or values). Other bidders' bids will influence the mechanism the seller will use in future rounds. Thus, based on  
 730 this information, bidder  $i$  can update her belief about other bidders' bids and the seller's choice of mechanisms  
 731 by Bayesian rule, then she can compute her expected utility on her updated belief.

732 **PBIC of the two-phase ERM algorithm.** As discussed, the two-phase ERM algorithm is a learning  
 733 algorithm that learns approximately revenue-optimal auctions in an approximately incentive-compatible way  
 734 against strategic bidders in repeated auctions. The algorithm, obtained by adopting the two-phase model with  
 735 ERM as the price learning function and setting  $K_1 = K_2 = K$ , works as follows:

- 736 • in the first  $T_1$  rounds, run any truthful, prior-independent auction  $\mathcal{M}$ , e.g., the second price auction  
 737 with no reserve;
- 738 • in the later  $T_2 = T - T_1$  rounds, run second price auction with reserve  $p = \text{ERM}^c(b_1, \dots, b_{T_1 K})$   
 739 where  $b_1, \dots, b_{T_1 K}$  are the bids from the first  $T_1$  auctions.

740  $T_1$  and  $c$  are adjustable parameters of the two-phase ERM algorithm.

741 **Theorem C.4.** The two-phase ERM algorithm is  $\epsilon$ -PBIC, where,

- 742 • for any bounded  $F$ ,  $\epsilon = \bar{m} D \Delta_{T_1 K, \bar{m} K}^{\text{worst}}$ , and
- 743 • for any MHR  $F$ , if  $\frac{\bar{m}}{T_1} \leq c \leq \frac{1}{4e}$  and  $\bar{m} K = o(\sqrt{T_1 K})$ , then  $\epsilon = O(\bar{m} v^* \Delta_{T_1 K, \bar{m} K}^{\text{worst}}) + O\left(\frac{\bar{m} v^*}{\sqrt{T_1 K}}\right)$ ,  
 744 where  $v^* = \arg \max_v \{v[1 - F(v)]\}$ .

745 The constants in big  $O$ 's are independent of  $F$  and  $c$ .

746 Combining with the bounds on  $\Delta_{N, m}^{\text{worst}}$  in Theorem 1.3, we have

747 **Corollary C.5.** The two-phase ERM algorithm is  $\epsilon_1$ -PBIC, where,

- 748 • for any bounded  $F$ ,

$$\epsilon_1 = O\left(\log^2(T_1 K) \sqrt[3]{\frac{D^{11} K \bar{m}^5}{T_1}}\right)$$

749 if  $\frac{\bar{m}}{T_1} \leq c \leq \frac{1}{2D}$  and  $\bar{m} K = o(\sqrt{T_1 K})$ ;

- 750 • for any MHR  $F$ ,

$$\epsilon_1 = O\left(\log^3(T_1 K) v^* \bar{m}^2 \sqrt{\frac{K}{T_1}}\right)$$

751 if  $\frac{\bar{m}}{T_1} \leq c \leq \frac{1}{4e}$  and  $\bar{m} K = o(\sqrt{T_1 K})$ .

752 The constants in big  $O$ 's are independent of  $F$  and  $c$ .

753 The guarantee of  $(1 - \epsilon_2)$  revenue optimality is the same as Theorem 2.2:

754 • For bounded and regular distribution,  $\epsilon_2 = O\left(\frac{T_1}{T} + \sqrt{\frac{D \cdot \log(T_1 K)}{T_1 K}}\right)$ .

755 • For MHR distribution,  $\epsilon_2 = O\left(\frac{T_1}{T} + \left[\frac{\log(T_1 K)}{T_1 K}\right]^{\frac{2}{3}}\right)$ .

756 In the rest of this section we prove Theorem C.4 for bounded distributions. The proof is similar to that of  
 757 Theorem 2.1 except that we need to consider the effect of history  $h_i^t$  on the conditional distribution of the values  
 758 of other bidders when considering perfect Bayesian equilibrium. The extension to MHR distributions is similar  
 759 to the extension of Theorem 2.1 to MHR distributions (discussed in Appendix D.2) and hence omitted.

760 *Proof of Theorem C.4 for bounded distributions.* Assume that other bidders bid truthfully and bidder  $i$  deviates  
 761 from truthful bidding to other strategy, consider the increase of bidder  $i$ 's total expected utility from round  $t$  to  
 762  $T$ , for each  $t$ , given any history  $h_i^t$  and any values  $\mathbf{v}_i$ . If  $t > T_1$ , then the auctions in  $t$  and later rounds are in the  
 763 second phase and never change due to the deviation of bidder  $i$ , thus deviation does not increase her utility.

764 Then we consider  $t \leq T_1$ . Strategic bidding does not increase bidder  $i$ 's utility in rounds  $t, t+1, \dots, T_1$  because  
 765 these rounds are in the first phase and the mechanism in the first phase is truthful. Thus, strategic bidding can  
 766 increase her utility only in the second phase. Let  $t' > T_1$  be a second-phase round in which she participates.  
 767 The auction at round  $t'$  is a second-price auction with reserve price determined by  $\text{ERM}^c$  from bids in rounds 1  
 768 to  $T_1$ . Denote by  $\mathbf{v}^{[1:T_1]}$  the values of all bidders in rounds 1 to  $T_1$ . If bidder  $i$  bid truthfully, then the reserve  
 769 price at round  $t'$  is  $p_1 = \text{ERM}^c(\mathbf{v}^{[1:T_1]})$ . Let  $A \subseteq [1 : T_1]$  be the set of rounds in which bidder  $i$  participates  
 770 from round 1 to round  $T_1$ . Then we can partition  $\mathbf{v}^{[1:T_1]}$  into two parts:  $\mathbf{v}^A$  and  $\mathbf{v}^{[1:T_1] \setminus A}$ , where  $\mathbf{v}^A$  denotes  
 771 bidders' values in the rounds in  $A$ , and  $\mathbf{v}^{[1:T_1] \setminus A}$  denotes the values in the rounds not in  $A$ . There are  $|A|K$   
 772 values in  $\mathbf{v}^A$ ,  $|A|$  of which are bidder  $i$ 's values. By deviating, bidder  $i$  can change her values in  $\mathbf{v}^A$  to some  
 773 arbitrary bids. We denote by  $\mathbf{b}^A$  the bids of bidder  $i$  and the values of other bidders in  $\mathbf{v}^A$ . After deviation, the  
 774 reserve price is changed to  $p_2 = \text{ERM}^c(\mathbf{b}^A, \mathbf{v}^{[1:T_1] \setminus A})$ . By (14), the increase of bidder  $i$ 's utility due to the  
 775 change of reserve price is at most  $p_1 - p_2$ , which is further upper-bounded by

$$\begin{aligned} p_1 - p_2 &= \text{ERM}^c(\mathbf{v}^A, \mathbf{v}^{[1:T_1] \setminus A}) - \text{ERM}^c(\mathbf{b}^A, \mathbf{v}^{[1:T_1] \setminus A}) \\ &\leq \text{ERM}^c(\mathbf{v}^A, \mathbf{v}^{[1:T_1] \setminus A}) \cdot \delta_I(\mathbf{v}^A, \mathbf{v}^{[1:T_1] \setminus A}) \\ &\leq \text{ERM}^c(\mathbf{v}^A, \mathbf{v}^{[1:T_1] \setminus A}) \cdot \delta_{|A|K}^{\text{worst}}(\mathbf{v}^{[1:T_1] \setminus A}) \\ &\leq D \cdot \delta_{|A|K}^{\text{worst}}(\mathbf{v}^{[1:T_1] \setminus A}). \end{aligned}$$

776 We then argue that given any history  $h_i^t, \mathbf{v}^{[1:T_1] \setminus A}$  are still i.i.d. samples from  $F$ , from bidder  $i$ 's perspective.  
 777 Note that bidder  $i$  does not participate in the auctions in rounds  $[1 : T_1] \setminus A$ , and the auctions she does participate  
 778 in before round  $t$  is prior-independent, which implies that the allocation of item and the payments of bidders  
 779 in any round depend only on the bids of bidders in that round but not on any information like bids from other  
 780 rounds. Moreover, other bidders' values across different rounds are independent. Therefore, the auctions bidder  $i$   
 781 participates in leaks no information about other bidders' values in rounds  $[1 : T_1] \setminus A$ .

782 Therefore, the increase of bidder  $i$ 's expected utility at round  $t'$  is at most

$$\begin{aligned} \mathbb{E}[p_1 - p_2 \mid h_i^t, \mathbf{v}_i] &\leq \mathbb{E}\left[D \cdot \delta_{|A|K}^{\text{worst}}(\mathbf{v}^{[1:T_1] \setminus A}) \mid h_i^t, \mathbf{v}_i\right] \\ &= \mathbb{E}_{\mathbf{v}^{[1:T_1] \setminus A} \sim F}\left[D \cdot \delta_{|A|K}^{\text{worst}}(\mathbf{v}^{[1:T_1] \setminus A})\right] \\ &= D \cdot \Delta_{T_1 K, |A|K}^{\text{worst}} \\ &\leq D \cdot \Delta_{T_1 K, \bar{m}K}^{\text{worst}}, \end{aligned}$$

783 where the last inequality is because  $|A| \leq \bar{m}$  and  $\Delta_{N, m_1}^{\text{worst}} \geq \Delta_{N, m_2}^{\text{worst}}$  for  $m_1 \geq m_2$ .

784 Since bidder  $i$  participates in at most  $\bar{m}$  auctions, the sum of increases of expected utility from round  $t$  to  $T$  is at  
 785 most  $\bar{m} D \Delta_{T_1 K, \bar{m}K}^{\text{worst}}$ .  $\square$

## 786 D Analysis for MHR Distributions

787 Recall that a distribution  $F$  is MHR if its hazard rate  $\frac{f(x)}{1-F(x)}$  is monotone non-decreasing.

### 788 D.1 Properties of MHR Distributions

789 Recall that  $R(q) = qv(q)$  is the revenue curve of distribution  $F$ , where  $q(v) = 1 - F(v)$ . And  $q^* =$   
 790  $\arg \max_q R(q)$  is the quantile of the optimal reserve price  $v^* = \arg \max_v [1 - F(v)]v = v(q^*)$ .

791 For MHR distributions, we first introduce a lemma which says that  $q^*$  is bounded away from 0 by a constant.

792 **Lemma D.1** (Hartline et al. [22]). *Any MHR distribution has a unique  $q^*$ , and  $q^* \geq \frac{1}{e}$ .*

793 Moreover, the revenue curve decreases quadratically from  $q^*$ .

794 **Lemma D.2** (Huang et al. [23], Lemma 3.3). *For any MHR  $F$ , for any  $0 \leq q \leq 1$ ,  $R(q^*) - R(q) \geq \frac{1}{4}(q^* - q)^2 R(q^*)$ .*

796 The following lemma shows that samples from an MHR distribution are rarely too large.

797 **Lemma D.3.** *Let  $F$  be an MHR distribution. Let  $X = \max\{v_1, \dots, v_N\}$  where  $v_1, \dots, v_N$  are  $N$  i.i.d. samples from  $F$ . For any  $x \geq v^*$ , we have  $\Pr[X > x] \leq N e^{-x/v^* + 1}$ .*

799 *Proof.* Note that  $1 - F(x) = \exp\left\{-\int_0^x \frac{f(v)}{1-F(v)} dv\right\} \leq \exp\left\{-\int_{v^*}^x \frac{f(v)}{1-F(v)} dv\right\}$ . By the definition of  $v^*$  we  
800 know  $(v^*[1 - F(v^*)])' = 0$ , or  $\frac{f(v^*)}{1-F(v^*)} = \frac{1}{v^*}$ . By the definition of MHR, we have  $\frac{f(x)}{1-F(x)} \geq \frac{1}{v^*}$  for any  
801  $x \geq v^*$ , thus

$$1 - F(x) \leq \exp\left\{-\int_{v^*}^x \frac{1}{v^*} dv\right\} = \exp\left\{-\frac{x - v^*}{v^*}\right\}.$$

802 Then the lemma follows from a simple union bound:

$$\Pr[X > x] = \Pr[\exists i, v_i > x] \leq N[1 - F(x)] \leq N \exp\left\{-\frac{x}{v^*} + 1\right\}.$$

803

□

804 We will use above lemmas to prove some further lemmas which characterize the behavior of  $\text{ERM}^c$  on samples  
805 from a MHR distribution, where  $c$  can be any value between  $m/N$  and  $1/(2e)$ . The samples we consider consist  
806 of  $m$  copies of  $+\infty$ , denoted by  $v_I$ , and  $N - m$  random draws from  $F$ . We sort the samples non-increasingly  
807 and use

$$v_{-I} = (v_{m+1} \geq v_{m+2} \geq \dots \geq v_N)$$

808 to denote the random draws. Let  $q_{m+1} \leq q_{m+2} \leq \dots \leq q_N$  denote their quantiles where  $q_j = q(v_j)$ .

809 **Lemma D.4.** *Let  $F$  be an MHR distribution. Suppose  $m = o(\sqrt{N})$ . Fix  $m$  values  $v_I$  to be  $+\infty$ , and randomly  
810 draw  $N - m$  values  $v_{-I}$  from  $F$ . Let  $k^* = \arg \max_{i > cN} \{v_i\}$ , i.e., the index selected by  $\text{ERM}^c$ , where  
811  $\frac{m}{N} \leq c \leq \frac{1}{2e}$ . Then we have*

$$R(q_{k^*}) \geq \left(1 - O\left(\sqrt{\frac{\log N}{N}}\right)\right) R(q^*),$$

812 with probability at least  $1 - O\left(\frac{1}{N}\right)$ .

813 *Proof.* Let  $\gamma \stackrel{\text{def}}{=} 2\sqrt{\frac{4 \ln(2(N-m))}{N-m}} + \frac{m}{N} = O\left(\sqrt{\frac{\log N}{N}}\right)$  as in Claim B.2. We have  $|q_j - \frac{j}{N}| \leq \gamma$  for any  
814  $j > m$  with probability at least  $1 - \frac{1}{N-m}$ . We thus assume  $|q_j - \frac{j}{N}| \leq \gamma$ .

815 The intuition is follows: The product  $jv_j$  divided by  $N$  approximates  $R(q_j) = q_j v_j$  up to an  $O(\gamma)$  error. Our  
816 proof consists of three steps: The first step is to show that with high probability, there must be some sample  
817 with quantile  $q_i$  that is very close to  $q^*$  so its revenue  $R(q_i) \approx R(q^*) \approx \frac{i}{N} v_i$ . The second step is to argue  
818 that all samples with quantile  $q_j < \frac{1}{2e}$  are unlikely to be chosen by  $\text{ERM}^c$  because  $q_j$  is too small and the gap  
819 between  $q^*$  and  $\frac{1}{2e}$  leads to a large loss in revenue, roughly speaking,  $\frac{j}{N} v_j \approx R(q_j) < (1 - \frac{1}{4}(\frac{1}{2e})^2) R(q^*) \approx$   
820  $(1 - \Omega(1)) \frac{i}{N} v_i$ . The final step is to show that if a quantile  $q_j > \frac{1}{2e}$  is to be chosen by  $\text{ERM}^c$ , then it must have  
821 equally good revenue as  $q_i$ .

822 Formally:

823 1. Firstly, consider the quantile interval  $[q^* - \gamma, q^*]$ . Each random draw  $q_i$ , if falling into this interval,  
824 will satisfy:

$$\frac{i}{N} v_i \geq (q_i - \gamma) v_i \geq (q^* - 2\gamma) v_i \geq (q^* - 2\gamma) v^* \geq (1 - 2e\gamma) q^* v^*, \quad (15)$$

825 where the last but one inequality is because  $q_i \leq q^*$  and the last one follows from  $q^* \geq \frac{1}{e}$ . The  
826 probability that no quantile falls into  $[q^* - \gamma, q^*]$  is at most

$$(1 - \gamma)^{N-m} = \left(1 - O\left(\sqrt{\frac{\log N}{N}}\right)\right)^{N-m} = o\left(\frac{1}{N}\right).$$

827 2. For the second step, first note that the  $q_i \in [q^* - \gamma, q^*]$  in the first step will be considered by  $\text{ERM}^c$   
 828 since  $i \geq (q_i - \gamma)N \geq (q^* - 2\gamma)N \geq (\frac{1}{e} - 2\gamma)N > cN$ . Then suppose  $\text{ERM}^c$  chooses another  
 829 quantile  $q_j$  instead of  $q_i$ , we must have

$$\frac{j}{N}v_j \geq \frac{i}{N}v_i. \quad (16)$$

830 We will show that such probability is small if  $q_j < \frac{1}{2e} + \gamma$ . Pick a threshold quantile  $\frac{1}{T}$  where  
 831  $T = N^{1/4}$ . Consider two cases:

832 • If  $0 \leq q_j < \frac{1}{T}$ . We argue that  $\text{ERM}^c$  picks  $q_j$  with probability at most  $o(\frac{1}{N})$ . Note that

$$\frac{j}{N}v_j \leq (q_j + \gamma)v_j \leq (\frac{1}{T} + \gamma)v_j, \quad (17)$$

833 together with (16) and (15), we obtain  $(\frac{1}{T} + \gamma)v_j \geq (1 - 2e\gamma)q^*v^*$ , implying

$$v_j \geq \frac{1 - 2e\gamma}{e} \frac{Tv^*}{1 + T\gamma} = \Omega(Tv^*),$$

834 since  $T\gamma = O\left(\frac{\sqrt{\log N}}{N^{1/4}}\right) \rightarrow 0$ . According to Lemma D.3, the probability that there exists  
 835  $v_j > \Omega(Tv^*)$  is at most

$$N \exp\left\{-\frac{\Omega(Tv^*)}{v^*} + 1\right\} = o\left(\frac{1}{N}\right).$$

836 • If  $\frac{1}{T} \leq q_j < \frac{1}{2e} + \gamma$ . We argue that  $\text{ERM}^c$  will never choose such  $q_j$ . Note that

$$\frac{j}{N}v_j \leq (q_j + \gamma)v_j \leq (1 + T\gamma)q_jv_j, \quad (18)$$

837 together with (16) and (15), we obtain  $(1 + T\gamma)q_jv_j > (1 - 2e\gamma)q^*v^*$ . Then by Lemma D.2,

$$\frac{1 - 2e\gamma}{1 + T\gamma} \leq \frac{q_jv_j}{q^*v^*} \leq 1 - \frac{1}{4}(q_j - q^*)^2 \leq 1 - \frac{1}{4}\left(\frac{1}{2e} - \gamma\right)^2. \quad (19)$$

838 However, the left hand side of (19) approaches 1 since  $\gamma$  and  $T\gamma$  approach 0 while the right  
 839 hand side is strictly less than 1, a contradiction. So this case never happens.

840 3. Finally, if  $q_j \geq \frac{1}{2e} + \gamma$ . We argue that if  $\text{ERM}^c$  picks  $q_j$  instead of  $q_i$ , then  $R(q_j)$  approximates  
 841  $R(q_i)$  well, satisfying the conclusion in the lemma. This is because

$$\begin{aligned} R(q_j) &= q_jv_j \geq \left(\frac{j}{N} - \gamma\right)v_j \\ &\geq (1 - 2e\gamma)\frac{j}{N}v_j && \frac{j}{N} \geq q_j - \gamma \geq \frac{1}{2e} \\ &\geq (1 - 2e\gamma)\frac{i}{N}v_i && \text{Eq. (16)} \\ &\geq (1 - 2e\gamma)(1 - 2e\gamma)q^*v^* && \text{Eq. (15)} \\ &= (1 - O(\gamma))R(q^*). \end{aligned}$$

842 Combining above three steps and the event in the beginning of the proof, we have  $R(q_{k^*}) \geq (1 -$   
 843  $O(\sqrt{\frac{\log N}{N}}))R(q^*)$  except with probability at most

$$\frac{1}{N - m} + o\left(\frac{1}{N}\right) + o\left(\frac{1}{N}\right) = O\left(\frac{1}{N}\right).$$

844 □

845 **Lemma D.5.** Let  $F$  be an MHR distribution. Suppose  $m = o(\sqrt{N})$ . Fix  $m$  values  $v_I$  to be  $+\infty$ , and randomly  
 846 draw  $N - m$  values  $v_{-I}$  from  $F$ . Let  $k^* = \arg \max_{i > cN} \{iv_i\}$ , i.e., the index selected by  $\text{ERM}^c$ , where  
 847  $\frac{m}{N} \leq c \leq \frac{1}{2e}$ . Let  $\epsilon = \sqrt[4]{\frac{\log N}{N}}$ . Then with probability at least  $1 - O\left(\frac{1}{N}\right)$ , the following inequalities hold:

- 848 1.  $q_{k^*} \geq q^* - O(\epsilon)$ ;
- 849 2.  $k^* \geq [q^* - O(\epsilon)]N > \frac{1}{2e}N$ ;
- 850 3.  $v_{k^*} \leq [1 + O(\epsilon)]v^*$ .



851 *Proof.* For inequality (1), by Lemma D.2 and Lemma D.4, with probability at least  $1 - O(\frac{1}{N})$ , we have

$$\frac{1}{4}(q_{k^*} - q^*)^2 \leq \frac{R(q^*) - R(q_{k^*})}{R(q^*)} \leq O\left(\sqrt{\frac{\log N}{N}}\right).$$

852 Taking the square root, we obtain  $q_{k^*} \geq q^* - O\left(\sqrt{\frac{\log N}{N}}\right)$ .

853 Assume that (1) holds. To prove (2), note that by Claim B.2, we have  $\frac{k^*}{N} \geq q_{k^*} - O\left(\sqrt{\frac{\log N}{N}}\right) \geq q^* - O(\epsilon)$   
 854 except with probability at most  $O(\frac{1}{N})$ , and  $q^* > \frac{1}{e}$ .

855 Finally, inequality (3) follows from

$$\frac{v_{k^*}}{v^*} = \frac{R(q_{k^*})}{R(q^*)} \frac{q^*}{q_{k^*}} \leq 1 \cdot \frac{q^*}{q_{k^*}} \leq \frac{q^*}{q^* - O(\epsilon)} = 1 + \frac{O(\epsilon)}{q^* - O(\epsilon)} \leq 1 + O(e\epsilon).$$

856 □

## 857 D.2 Detailed Proof of Theorem 2.1 for MHR Distributions

858 Let  $\Delta U(\mathbf{v}_i, b_I, v_{-I}) = U_i^{\text{TP}}(\mathbf{v}_i, b_I, v_{-I}) - U_i^{\text{TP}}(\mathbf{v}_i, v_I, v_{-I})$ . Similar to the proof for bounded distributions,  
 859 we have for any  $\mathbf{v}_i, b_I, v_{-I}$ ,

$$\Delta U(\mathbf{v}_i, b_I, v_{-I}) \leq m_2 \cdot \left( \text{ERM}^c(v_I, v_{-I}) - \text{ERM}^c(b_I, v_{-I}) \right) \leq m_2 \cdot \text{ERM}^c(v_I, v_{-I}) \cdot \delta_{m_1}^{\text{worst}}(v_{-I}).$$

860 By Claim A.2, we have  $\text{ERM}^c(v_I, v_{-I}) \leq \text{ERM}^c(\bar{v}_I, v_{-I})$  where  $\bar{v}_I$  can be any  $m_1$  values (e.g.,  $+\infty$ ) that  
 861 are greater than the maximal value in  $v_{-I}$ , when  $c \geq \frac{m_1}{T_1 K_1}$ .

862 Let  $N = T_1 K_1$ , define two threshold prices  $T_1 = \sqrt{N}v^*$  and  $T_2 = [1 + O(\epsilon)]v^*$  where  $\epsilon = \sqrt[4]{\frac{\log N}{N}}$  as in  
 863 Lemma D.5. Note that for sufficiently large  $N$ ,  $T_1 > T_2$ . With the random draw of  $v_{-I}$  from  $F$ , denote the  
 864 random variable  $\text{ERM}^c(\bar{v}_I, v_{-I})$  by  $P$ , we have:

$$\begin{aligned} \mathbb{E}_{\mathbf{v}_{-i}} [\Delta U(\mathbf{v}_i, b_I, v_{-I})] &= \mathbb{E}_{v_{-I}} [\Delta U(\mathbf{v}_i, b_I, v_{-I}) \mid P \leq T_2] \cdot \Pr[P \leq T_2] \\ &\quad + \mathbb{E}_{v_{-I}} [\Delta U(\mathbf{v}_i, b_I, v_{-I}) \mid T_2 < P \leq T_1] \cdot \Pr[T_2 < P \leq T_1] \\ &\quad + \mathbb{E}_{v_{-I}} [\Delta U(\mathbf{v}_i, b_I, v_{-I}) \mid P > T_1] \cdot \Pr[P > T_1] \\ &\stackrel{\text{def}}{=} \mathbb{E}_1 + \mathbb{E}_2 + \mathbb{E}_3. \end{aligned} \tag{20}$$

865 1. For the first term  $\mathbb{E}_1$ ,

$$\begin{aligned} \mathbb{E}_1 &= \mathbb{E}_{v_{-I}} [\Delta U(\mathbf{v}_i, b_I, v_{-I}) \mid P \leq T_2] \cdot \Pr[P \leq T_2] \\ &\leq \mathbb{E}_{v_{-I}} [m_2 \cdot P \cdot \delta_{m_1}^{\text{worst}}(v_{-I}) \mid P \leq T_2] \cdot \Pr[P \leq T_2] \\ &\leq m_2 \cdot T_2 \cdot \mathbb{E}_{v_{-I}} [\delta_{m_1}^{\text{worst}}(v_{-I}) \mid P \leq T_2] \cdot \Pr[P \leq T_2] \\ &\leq m_2 \cdot [1 + O(\epsilon)]v^* \cdot \mathbb{E}_{v_{-I}} [\delta_{m_1}^{\text{worst}}(v_{-I})] \\ &= O(m_2 \cdot v^* \cdot \Delta_{N, m_1}^{\text{worst}}). \end{aligned}$$

866 2. For the second term, we claim that  $\mathbb{E}_2 = O(\frac{m_2 v^*}{\sqrt{N}})$ .

867 By Lemma D.5, we have  $\Pr[P > [1 + O(\epsilon)]v^*] \leq O(\frac{1}{N})$ . Therefore,

$$\begin{aligned} \mathbb{E}_2 &= \mathbb{E}_{v_{-I}} [\Delta U(\mathbf{v}_i, b_I, v_{-I}) \mid T_2 < P \leq T_1] \cdot \Pr[T_2 < P \leq T_1] \\ &\leq \mathbb{E}_{v_{-I}} [m_2 \cdot P \cdot 1 \mid T_2 < P \leq T_1] \cdot \Pr[T_2 < P \leq T_1] \\ &\leq m_2 \cdot T_1 \cdot \Pr[P > T_2] \\ &\leq m_2 \cdot \sqrt{N}v^* \cdot O\left(\frac{1}{N}\right) \\ &= O\left(\frac{m_2 v^*}{\sqrt{N}}\right). \end{aligned}$$

868

3. For the third term, we claim that  $\mathbb{E}_3 = o\left(\frac{m_2 v^*}{N}\right)$ .

869

Let  $B$  be the upper bound on the support of  $F$  ( $B$  can be  $+\infty$ ). Let  $F_P(x)$  be the distribution of  $P$ .

870

For convenience, suppose it is continuous and has density  $f_P(x)$ . We have:

$$\begin{aligned}\mathbb{E}_3 &= \mathbb{E}_{v_{-I}} [\Delta U(\mathbf{v}_i, b_I, v_{-I}) \mid P > T_1] \cdot \Pr[P > T_1] \\ &\leq \mathbb{E}_{v_{-I}} [m_2 \cdot P \cdot 1 \mid P > T_1] \cdot \Pr[P > T_1] \\ &= m_2 \cdot \mathbb{E}_{v_{-I}} [P \mid P > T_1] \cdot \Pr[P > T_1] \\ &= m_2 \cdot \int_{T_1}^B x f_P(x) dx \\ &= m_2 \cdot \left( \int_{T_1}^B [1 - F_P(x)] dx + T_1 [1 - F_P(T_1)] \right).\end{aligned}$$

871

Let  $\max\{v_{-I}\}$  denote the maximum value in the  $N - m_1$  samples  $v_{-I}$ . By Lemma D.3, we have for any  $x \geq v^*$ ,

872

$$1 - F_P(x) = \Pr[P > x] \leq \Pr[\max\{v_{-I}\} > x] \leq N e^{-\frac{x}{v^*} + 1}.$$

873

Thus,

$$\begin{aligned}\int_{T_1}^B [1 - F_P(x)] dx + T_1 [1 - F_P(T_1)] &\leq v^* N e^{-\frac{T_1}{v^*} + 1} + T_1 N e^{-\frac{T_1}{v^*} + 1} \\ &= v^* N (1 + \sqrt{N}) e^{-\sqrt{N} + 1} \\ &= o\left(\frac{v^*}{N}\right),\end{aligned}$$

874

as desired.

875

Combining the three items,

$$\mathbb{E}_{v_{-i}} [\Delta U(\mathbf{v}_i, b_I, v_{-I})] = O(m_2 v^* \Delta_{N, m_1}^{\text{worst}}) + O\left(\frac{m_2 v^*}{\sqrt{N}}\right).$$

876

### D.3 An Improved Bound on Incentive-Awareness Measure for MHR Distributions

877

Here we improve the upper bound on  $\Delta_{N, m}^{\text{worst}}$  for MHR distributions by proving:

878

**Lemma D.6** (Tighter bound for MHR distributions). *Moreover, if  $F$  is MHR, let  $d = \frac{1}{2e}$ , and suppose  $\frac{m}{N} \leq c \leq \frac{1}{4e}$ , we have*

879

$$\Delta_{N, m}^{\text{worst}} \leq O\left(\frac{m}{d^{7/2}} \frac{\log^3 N}{\sqrt{N}}\right) + \Pr[E].$$

880

The main idea is to limit the range of the quantile  $q_j$  of the “bad value”  $v_j$  in  $\text{Bad}(\eta_t, \theta_t)$  in Lemma B.5. Recall that in the proof of Lemma B.5 we assume  $q_j$  can take any value in  $[0, 1]$ , divide  $[0, 1]$  into  $O(1/h)$  intervals (as in (11)), and take a union bound to upper-bound the probability that a bad  $q_j$  exists. For MHR distributions,

881

882

883

however, we will show that  $q_j v_j$  is a  $(1 - O(\sqrt{\frac{\log N}{N}}))$  approximation to  $R(q^*)$ , thus we can use Lemma D.2

884

to reduce the possible range of  $q_j$  from 1 to  $O(\sqrt[4]{\frac{\log N}{N}})$ .

885

#### D.3.1 Proof of Lemma D.6

886

We repeat the argument for Lemma B.1 until Claim B.2, before which we have:

$$\Delta_{N, m}^{\text{worst}} \leq \int_0^1 \Pr[\delta_I(\bar{v}_I, v_{-I}) > \eta \wedge \bar{E}] d\eta + \Pr[E]. \quad (21)$$

887

Let  $\gamma = O(\sqrt{\frac{\log N}{N}})$  be the upper bound on  $|q_j - \frac{j}{N}|$  in Conc. With the random draw of  $N - m$  samples  $v_{-I}$

888

from  $F$  (and assume other  $m$  samples  $\bar{v}_I$  are equal to  $\max\{v_{-I}\}$ ), we have  $|q_j - \frac{j}{N}| < \gamma$  for any  $j > m$  with probability at least  $1 - \frac{1}{N-m}$ . Moreover, by Lemma D.4 and Lemma D.5, with probability at least  $1 - O(\frac{1}{N})$

889

890

we have  $R(q_{k^*}) = q_{k^*} v_{k^*} \geq (1 - \epsilon) R(q^*)$  and  $q_{k^*} \geq q^* - O(\sqrt{\epsilon}) > \frac{1}{2e}$ , where  $\epsilon = O(\sqrt{\frac{\log N}{N}})$ . Combine

891

the above two inequalities with Conc and denote the combined event by  $\text{Conc}'$ , i.e.,

$$\text{Conc}' \stackrel{\text{def}}{=} \text{Conc} \wedge [R(q_{k^*}) \geq (1 - \epsilon) R(q^*)] \wedge \left[ q_{k^*} \geq q^* - O(\sqrt{\epsilon}) > \frac{1}{2e} \right].$$

892 We have  $\Pr[\overline{\text{Conc}}] \leq O(\frac{1}{N})$ . Re-define  $G(\eta) = \Pr[\delta_I(\bar{v}_I, v_{-I}) > \eta \wedge \bar{E} \wedge \text{Conc}']$ , and re-write (4):

$$\Pr[\delta_I(\bar{v}_I, v_{-I}) > \eta \wedge \bar{E}] \leq G(\eta) + O\left(\frac{1}{N}\right). \quad (22)$$

893 The following steps of bounding  $G(\eta) = \Pr[\delta_I(\bar{v}_I, v_{-I}) > \eta \wedge \bar{E} \wedge \text{Conc}']$  are the same as before (in  
894 particular, Lemma B.4 in Lemma B.3), until upper-bounding  $\Pr[\text{Bad}(\eta, \theta) \wedge \bar{E} \wedge \text{Conc}']$  (Lemma B.5), where  
895 we improve the bound by a factor of  $\sqrt[4]{\frac{\log N}{N}}$ .

896 **Lemma D.7** (Improved Lemma B.5 for MHR distributions). *Let  $d = \frac{1}{2e}$ . If  $\eta$  and  $\theta$  are at least*  
897  $\Omega\left(\frac{m}{d} \sqrt{\frac{\log(N-m)}{N-m}}\right)$ , *then*  $\Pr[\text{Bad}(\eta, \theta) \wedge \bar{E} \wedge \text{Conc}'] = O\left(\sqrt[4]{\frac{\log N}{N}} \frac{m \log^2 N}{d^4 \theta \sqrt{\eta^3 N}}\right)$ .

898 *Proof.* The proof is the same as that of Lemma B.5 (in Appendix B.5), except that before dividing the quantile  
899 space  $[0, 1]$ , we argue that the space to be divided can be shortened to  $[q^* - O(\sqrt{\epsilon}), q^* + O(\sqrt{\epsilon})]$ .

900 Consider the index  $j$  that is promised to exist in  $\text{Bad}(\eta, \theta)$ ,

$$\begin{aligned} R(q_j) &= q_j v_j \\ &\geq \left(\frac{j}{N} - \gamma\right) v_j && \text{Conc}' \\ &\geq \frac{k^*}{N} v_{k^*} - \frac{m}{N\theta} v_{k^*} - \gamma v_{k^*} && j v_j \geq k^* v_{k^*} - \frac{m}{\theta} v_{k^*} \text{ and } v_j \leq v_{k^*} \\ &\geq (q_{k^*} - \gamma) v_{k^*} - \frac{m}{N\theta} v_{k^*} - \gamma v_{k^*} && \text{Conc}' \\ &= \left[q_{k^*} - \left(2\gamma + \frac{m}{N\theta}\right)\right] v_{k^*} \\ &= \left[1 - \frac{2\gamma + \frac{m}{N\theta}}{q_{k^*}}\right] R(q_{k^*}) \\ &\geq \left[1 - 2e\left(2\gamma + \frac{m}{N\theta}\right)\right] (1 - \epsilon) R(q^*) && q_{k^*} \geq \frac{1}{2e} \text{ and } R(q_{k^*}) \geq (1 - \epsilon) R(q^*) \text{ in Conc}' \\ &= \left[1 - O\left(\sqrt{\frac{\log N}{N}}\right)\right] R(q^*) && \text{Definition of } \gamma \text{ and } \epsilon, \text{ and } \theta = \Omega\left(m \sqrt{\frac{\log N}{N}}\right). \end{aligned}$$

901 By Lemma D.2, we have

$$|q_j - q^*| \leq 2 \sqrt{O\left(\sqrt{\frac{\log N}{N}}\right)} = O\left(\sqrt[4]{\frac{\log N}{N}}\right).$$

902 Now we modify the analysis after Claim B.8. Consider those intervals  $I_l$ 's with length  $h$  in (11) that intersect  
903 with

$$I_{q_j} = \left[q^* - O\left(\sqrt[4]{\frac{\log N}{N}}\right), q^* + O\left(\sqrt[4]{\frac{\log N}{N}}\right)\right].$$

904 There are at most  $O\left(\frac{1}{h} \sqrt[4]{\frac{\log N}{N}}\right)$  such intervals and we denote the set of (indices of) those intervals by  $\mathcal{L}$ . The  
905 definitions of  $i_l^*$ ,  $i_{<(l+1)}^*$ ,  $A_l$ ,  $A_{<(l+1)}$ , and  $W_l$  remain unchanged. By choosing the index  $l$  such that  $q_j \in I_{l+2}$ ,  
906 we know that if the event  $[\text{Bad}(\eta, \theta) \wedge \bar{E} \wedge \text{Conc}']$  holds then  $W_l$  must hold for some  $l$  such that  $l + 2 \in \mathcal{L}$ .  
907 By Lemma B.9 we have  $\Pr[W_l] \leq O\left(\frac{H \log^2 N}{\sqrt{h d^3 N}}\right)$ . Taking a union bound over  $l$ , we obtain

$$\Pr[\text{Bad}(\eta, \theta) \wedge \bar{E} \wedge \text{Conc}'] \leq O\left(\frac{1}{h} \sqrt[4]{\frac{\log N}{N}} \cdot \frac{H \log^2 N}{\sqrt{h d^3 N}}\right) = O\left(\sqrt[4]{\frac{\log N}{N}} \frac{m \log^2 N}{d \theta \sqrt{(d\eta)^3 d^3 N}}\right),$$

908 where the last equality is because  $H = O(\frac{m}{d\theta})$  and  $h = \Omega(d\eta)$  under the assumption that  $\eta$  and  $\theta$  are at least  
909  $\Omega\left(\frac{m}{d} \sqrt{\frac{\log(N-m)}{N-m}}\right)$ .  $\square$

910 Then we improve Lemma B.3 based on Lemma D.7.

911 **Lemma D.8** (Improved Lemma B.3). *If  $\eta$  is at least  $\Omega\left(\frac{m}{d} \sqrt{\frac{\log(N-m)}{N-m}}\right)$ , then  $G(\eta) = O\left(\frac{m \log^3 N}{d^4 N^{3/4}} \frac{1}{\eta^{3/2}}\right)$ .*

912 *Proof.* Modify the end of Appendix B.3,

$$\begin{aligned}
\Pr[\delta_I(\bar{v}_I, v_{-I}) > \eta \wedge \bar{\mathbb{E}} \wedge \text{Conc}'] &\leq \sum_{t=0}^M \Pr[\text{Bad}(\eta_t, \theta_t) \wedge \bar{\mathbb{E}} \wedge \text{Conc}'] && \text{Lemma B.4} \\
&= \sum_{t=0}^M O\left(\sqrt[4]{\frac{\log N}{N}} \frac{m \log^2 N}{d^4 \theta_t \sqrt{\eta_t^3 N}}\right) && \text{Lemma D.7} \\
&= \sum_{t=0}^M O\left(\sqrt[4]{\frac{\log N}{N}} \frac{m \log^2 N}{d^4 \sqrt{N}} \frac{\eta_{t+1}}{\eta \sqrt{\eta_t^3}}\right) && \text{Definition of } \theta_t \\
&= O\left(\sqrt[4]{\frac{\log N}{N}} \frac{m \log^2 N}{d^4 \sqrt{N}} \cdot \sum_{t=0}^M \frac{\eta_{t+1}}{\eta} \frac{1}{\eta_t^{3/2}}\right)
\end{aligned}$$

913 Note that because  $\eta_t, \theta_t \geq \frac{\eta}{2}$ , the condition of Lemma D.7 is satisfied when  $\eta = \Omega\left(\frac{m}{d} \sqrt{\frac{\log(N-m)}{N-m}}\right)$ .

914 By Claim B.6, we can choose a sequence of  $\{\eta_t\}$  such that

$$\sum_{t=0}^M \frac{\eta_{t+1}}{\eta} \frac{1}{\eta_t^{3/2}} = O\left(\frac{\log \log(N-m)}{\eta^{3/2}}\right).$$

915 Therefore,

$$\Pr[\delta_I(\bar{v}_I, v_{-I}) > \eta \wedge \bar{\mathbb{E}} \wedge \text{Conc}'] \leq O\left(\frac{m \log^{2+1/4} N}{d^4 N^{1/2+1/4}} \cdot \frac{\log \log(N-m)}{\eta^{3/2}}\right) = O\left(\frac{m \log^3 N}{d^4 N^{3/4}} \frac{1}{\eta^{3/2}}\right).$$

916  $\square$

917 We finish the proof of Lemma D.6 by computing the integral in (21). Let  $C = \Theta\left(\frac{m \log^3 N}{d^4 N^{3/4}}\right)$  be the bound on

918  $G(\eta)$  in Lemma D.8, and let  $A = \Theta\left(\frac{m}{d} \sqrt{\frac{\log(N-m)}{N-m}}\right) = \Theta\left(\frac{m}{d} \sqrt{\frac{\log N}{N}}\right)$  be the condition on the lower bound on

919  $\eta$  in Lemma D.8. Then  $G(\eta) < \frac{C}{\eta^{3/2}}$  when  $\eta > \max\{C^{2/3}, A\}$ . If  $C^{2/3} > A$ , then we have

$$\begin{aligned}
\int_0^1 \Pr[\delta_I(\bar{v}_I, v_{-I}) > \eta \wedge \bar{\mathbb{E}}] d\eta &\leq \int_0^1 \left(G(x) + O\left(\frac{1}{N}\right)\right) dx && \text{by (22)} \\
&\leq \int_0^{C^{2/3}} 1 dx + \int_{C^{2/3}}^1 \frac{C}{x^{3/2}} dx + O\left(\frac{1}{N}\right) \\
&= C^{2/3} + \frac{C}{-\frac{1}{2}} - \frac{C}{-\frac{1}{2}} C^{-1/3} + O\left(\frac{1}{N}\right) \\
&\leq 3C^{2/3} + O\left(\frac{1}{N}\right) \\
&= O\left(\frac{m^{2/3} \log^2 N}{d^{8/3} \sqrt{N}}\right) + O\left(\frac{1}{N}\right) \\
&= O\left(\frac{m^{2/3} \log^2 N}{d^{8/3} \sqrt{N}}\right).
\end{aligned}$$

920 If  $A > C^{2/3}$ , then we have:

$$\begin{aligned}
\int_0^1 \Pr[\delta_I(\bar{v}_I, v_{-I}) > \eta \wedge \bar{\mathbb{E}}] d\eta &\leq \int_0^1 \left(G(x) + O\left(\frac{1}{N}\right)\right) dx && \text{by (22)} \\
&\leq \int_0^A 1 dx + \int_A^1 \frac{C}{x^{3/2}} dx + O\left(\frac{1}{N}\right) \\
&= A + \frac{C}{-\frac{1}{2}} - \frac{C}{-\frac{1}{2}} A^{-1/2} + O\left(\frac{1}{N}\right) \\
&\leq \Theta\left(\frac{m}{d} \sqrt{\frac{\log N}{N}}\right) + \Theta\left(\frac{m^{1-1/2} \log^{3-1/4} N}{d^{4-1/2} N^{3/4-1/4}}\right) + O\left(\frac{1}{N}\right) \\
&= O\left(\frac{m \log^3 N}{d^{7/2} \sqrt{N}}\right),
\end{aligned}$$

921 which, together with (21), concludes the proof of Lemma D.6.

## 922 E Analysis for $\alpha$ -Strongly Regular Distributions

### 923 E.1 Useful Lemmas

924 **Lemma E.1** (Cole and Roughgarden [11]). *Any  $\alpha$ -strongly regular distribution has a unique  $q^*$ , and  $q^* \geq$*   
 925  $\alpha^{\frac{1}{1-\alpha}}$ .

926 **Lemma E.2** (Huang et al. [23], Lemma 3.5). *For any  $\alpha$ -strongly regular distribution  $F$ , for any  $0 \leq q \leq 1$ ,*  
 927  $R(q^*) - R(q) \geq \frac{\alpha}{3}(q^* - q)^2 R(q^*)$ .

928 **Lemma E.3.** *Let  $F$  be an  $\alpha$ -strongly regular distribution. Let  $X = \max\{v_1, \dots, v_N\}$  where  $v_1, \dots, v_N$  are*  
 929  $N$  i.i.d. samples from  $F$ . *For any  $x \geq v^*$ , we have  $\Pr[X > x] \leq N \left( \frac{v^*}{(1-\alpha)x + \alpha v^*} \right)^{\frac{1}{1-\alpha}}$ .*

930 *Proof.* Note that  $1 - F(x) = \exp \left\{ - \int_0^x \frac{f(v)}{1-F(v)} dv \right\} \leq \exp \left\{ - \int_{v^*}^x \frac{f(v)}{1-F(v)} dv \right\}$ . By the definition of  $v^*$  we  
 931 know  $(v^*[1 - F(v^*)])' = 0$ , or  $\frac{f(v^*)}{1-F(v^*)} = \frac{1}{v^*}$ . By the definition of  $\alpha$ -strong regularity, we have

$$\left( \frac{1 - F(x)}{f(x)} \right)' = 1 - \frac{d\phi}{dx} \leq 1 - \alpha$$

932 and

$$\frac{1 - F(x)}{f(x)} \leq \frac{1 - F(v^*)}{f(v^*)} + (1 - \alpha)(x - v^*).$$

933 Thus

$$\int_{v^*}^x \frac{f(v)}{1 - F(v)} \geq \int_{v^*}^x \frac{1}{\frac{1 - F(v^*)}{f(v^*)} + (1 - \alpha)(v - v^*)} dv = \frac{1}{1 - \alpha} [\ln(v^* + (1 - \alpha)(x - v^*)) - \ln v^*]$$

934 and

$$1 - F(x) \leq \exp \left\{ - \frac{1}{1 - \alpha} \ln \frac{v^* + (1 - \alpha)(x - v^*)}{v^*} \right\} = \left( \frac{v^*}{(1 - \alpha)x + \alpha v^*} \right)^{\frac{1}{1 - \alpha}}.$$

935 Then the lemma follows from a simple union bound:

$$\Pr[X > x] = \Pr[\exists i, v_i > x] \leq N[1 - F(x)] \leq N \left( \frac{v^*}{(1 - \alpha)x + \alpha v^*} \right)^{\frac{1}{1 - \alpha}}.$$

936 □

937 **Claim E.4.** (Improved Claim B.2) *Define event Conc:*

$$\text{Conc} = \left[ \forall j > m, \left| q_j - \frac{j}{N} \right| \leq 2\sqrt{\frac{3 \ln(2(N - m))}{\alpha(N - m)}} + \frac{m}{N} \right],$$

938 *then  $\Pr[\overline{\text{Conc}}] \leq \frac{1}{(N - m)^{\frac{3 - 2\alpha}{2\alpha}}}$ , where the probability is over the random draw of the  $N - m$  samples  $v_{-I}$ .*

939 *Proof.* Set  $\delta = \frac{1}{(N - m)^{\frac{3 - 2\alpha}{2\alpha}}}$  in Lemma A.3. □

940 **Lemma E.5.** *Let  $F$  be an  $\alpha$ -strongly regular distribution. Suppose  $m = o(\sqrt{N})$ . Fix  $m$  values  $v_I$  to be  $+\infty$ ,*  
 941 *and randomly draw  $N - m$  values  $v_{-I}$  from  $F$ . Let  $k^* = \arg \max_{i > cN} \{i v_i\}$ , i.e., the index selected by ERM<sup>c</sup>,*  
 942 *where  $\left(\frac{\log N}{N}\right)^{\frac{1}{3}} \leq c \leq \frac{\alpha^{1/(1-\alpha)}}{2}$ . Then we have*

$$R(q_{k^*}) \geq \left( 1 - O \left( \sqrt{\frac{\log N}{N}} \right) \right) R(q^*),$$

943 *with probability at least  $1 - O \left( \frac{1}{N^{\frac{3 - 2\alpha}{2\alpha}}} \right)$ . The constants in the big  $O$ 's depend on  $\alpha$ .*

944 *Proof.* Let  $\gamma \stackrel{\text{def}}{=} 2\sqrt{\frac{3 \log(2(N - m))}{\alpha(N - m)}} + \frac{m}{N} = O \left( \sqrt{\frac{\log N}{N}} \right)$  as in Claim E.4. We have  $|q_j - \frac{j}{N}| \leq \gamma$  for any  
 945  $j > m$  with probability at least  $1 - \frac{1}{(N - m)^{\frac{3 - 2\alpha}{2\alpha}}}$ . We thus assume  $|q_j - \frac{j}{N}| \leq \gamma$ . For simplicity, we define  
 946  $e(\alpha) = \alpha^{1/(1-\alpha)}$ , and Lemma E.1 implies  $q^* \geq e(\alpha)$ .

947 The intuition is follows: The product  $jv_j$  divided by  $N$  approximates  $R(q_j) = q_j v_j$  up to an  $O(\gamma)$  error. Our  
 948 proof consists of three steps: The first step is to show that with high probability, there must be some sample with  
 949 quantile  $q_i$  that is very close to  $q^*$  so its revenue  $R(q_i) \approx R(q^*) \approx \frac{i}{N} v_i$ . The second step is to argue that all  
 950 samples with quantile  $q_j < \frac{e(\alpha)}{2}$  are unlikely to be chosen by  $\text{ERM}^c$  because  $q_j$  is too small and the gap between  
 951  $q^*$  and  $\frac{e(\alpha)}{2}$  leads to a large loss in revenue, roughly speaking,  $\frac{j}{N} v_j \approx R(q_j) < (1 - \frac{\alpha}{3} (\frac{e(\alpha)}{2})^2) R(q^*) \approx$   
 952  $(1 - \Omega(1)) \frac{i}{N} v_i$ . The final step is to show that if a quantile  $q_j > \frac{e(\alpha)}{2}$  is to be chosen by  $\text{ERM}^c$ , then it must  
 953 have equally good revenue as  $q_i$ .

954 Formally:

955 1. Firstly, consider the quantile interval  $[q^* - \gamma, q^*]$ . Each random draw  $q_i$ , if falling into this interval,  
 956 will satisfy:

$$\frac{i}{N} v_i \geq (q_i - \gamma) v_i \geq (q^* - 2\gamma) v_i \geq (q^* - 2\gamma) v^* \geq (1 - 2\gamma/e(\alpha)) q^* v^*, \quad (23)$$

957 where the last but one inequality is because  $q_i \leq q^*$  and the last one follows from  $q^* \geq e(\alpha)$ . The  
 958 probability that no quantile falls into  $[q^* - \gamma, q^*]$  is at most

$$(1 - \gamma)^{N-m} = \left(1 - O\left(\sqrt{\frac{\log N}{N}}\right)\right)^{N-m} = o\left(\frac{1}{N^{\frac{3-2\alpha}{2\alpha}}}\right).$$

959 2. For the second step, first note that the  $q_i \in [q^* - \gamma, q^*]$  in the first step will be considered by  $\text{ERM}^c$   
 960 since  $i \geq (q_i - \gamma)N \geq (q^* - 2\gamma)N \geq (e(\alpha) - 2\gamma)N > cN$ . Then suppose  $\text{ERM}^c$  chooses another  
 961 quantile  $q_j$  instead of  $q_i$ , we must have

$$\frac{j}{N} v_j \geq \frac{i}{N} v_i. \quad (24)$$

962 We will show that such  $q_j$  does not exist.

963 Suppose  $\text{ERM}^c$  chooses  $q_j$ , then  $j$  must satisfy  $j/N > c > (\frac{\log N}{N})^{\frac{1}{3}}$ , and as a result,  $q_j >$   
 964  $(\frac{\log N}{N})^{\frac{1}{3}} - \gamma$ .

965 If  $(\frac{\log N}{N})^{\frac{1}{3}} - \gamma < q_j < \frac{e(\alpha)}{2} + \gamma$ , note that

$$\frac{j}{N} v_j \leq (q_j + \gamma) v_j \leq \left(1 + \frac{\gamma}{(\frac{\log N}{N})^{\frac{1}{3}} - \gamma}\right) q_j v_j, \quad (25)$$

966 together with (24) and (23), we obtain  $\left(1 + \frac{\gamma}{(\frac{\log N}{N})^{\frac{1}{3}} - \gamma}\right) q_j v_j > (1 - 2\gamma/e(\alpha)) q^* v^*$ . Then by  
 967 Lemma E.2,

$$\frac{1 - 2\gamma/e(\alpha)}{1 + \frac{\gamma}{(\frac{\log N}{N})^{\frac{1}{3}} - \gamma}} \leq \frac{q_j v_j}{q^* v^*} \leq 1 - \frac{\alpha}{3} (q_j - q^*)^2 \leq 1 - \frac{\alpha}{3} \left(\frac{e(\alpha)}{2} - \gamma\right)^2. \quad (26)$$

968 However, the left hand side of (26) approaches to 1 while the right hand side is strictly less than 1, a  
 969 contradiction. So this case never happens.

970 3. Finally, if  $q_j \geq \frac{e(\alpha)}{2} + \gamma$ . We argue that if  $\text{ERM}^c$  picks  $q_j$  instead of  $q_i$ , then  $R(q_j)$  approximates  
 971  $R(q_i)$  well, satisfying the conclusion in the lemma. This is because

$$\begin{aligned} R(q_j) &= q_j v_j \geq \left(\frac{j}{N} - \gamma\right) v_j \\ &\geq \left(1 - \frac{2\gamma}{e(\alpha)}\right) \frac{j}{N} v_j && \frac{j}{N} \geq q_j - \gamma \geq \frac{e(\alpha)}{2} \\ &\geq \left(1 - \frac{2\gamma}{e(\alpha)}\right) \frac{i}{N} v_i && \text{Eq. (24)} \\ &\geq \left(1 - \frac{2\gamma}{e(\alpha)}\right) \left(1 - \frac{2\gamma}{e(\alpha)}\right) q^* v^* && \text{Eq. (23)} \\ &= (1 - O(\gamma)) R(q^*). \end{aligned}$$

972 Combining above three steps and the event in the beginning of the proof, we have  $R(q_{k^*}) \geq (1 -$   
 973  $O(\sqrt{\frac{\log N}{N}}))R(q^*)$  except with probability at most

$$\frac{1}{(N-m)^{\frac{3-2\alpha}{2\alpha}}} + o\left(\frac{1}{N^{\frac{3-2\alpha}{2\alpha}}}\right) = O\left(\frac{1}{N^{\frac{3-2\alpha}{2\alpha}}}\right).$$

974 □

975 **Lemma E.6.** *Let  $F$  be an  $\alpha$ -strongly regular distribution. Suppose  $m = o(\sqrt{N})$ . Fix  $m$  values  $v_I$  to be  $+\infty$ ,*  
 976 *and randomly draw  $N - m$  values  $v_{-I}$  from  $F$ . Let  $k^* = \arg \max_{i > cN} \{iv_i\}$ , i.e., the index selected by  $\text{ERM}^c$ ,*  
 977 *where  $(\frac{\log N}{N})^{\frac{1}{3}} \leq c \leq \frac{\alpha^{1/(1-\alpha)}}{2}$ . Let  $\epsilon = \sqrt[4]{\frac{\log N}{N}}$ . Then with probability at least  $1 - O\left(\frac{1}{N^{\frac{3-2\alpha}{2\alpha}}}\right)$ ,* the  
 978 *following three inequalities hold:*

- 979 1.  $q_{k^*} \geq q^* - O(\epsilon)$ ;
- 980 2.  $k^* \geq [q^* - O(\epsilon)]N > \frac{\alpha^{1/(1-\alpha)}}{2}N$ ;
- 981 3.  $v_{k^*} \leq [1 + O(\epsilon)]v^*$ .

982 *The constants in the big  $O$ 's depend on  $\alpha$ .*

983 *Proof.* Define  $e(\alpha) = \alpha^{1/(1-\alpha)}$ . We have  $q^* \geq e(\alpha)$ .

984 For inequality (1), by Lemma E.2 and Lemma E.5, with probability at least  $1 - O\left(\frac{1}{N^{\frac{3-2\alpha}{2\alpha}}}\right)$ , we have

$$\frac{\alpha}{3}(q_{k^*} - q^*)^2 \leq \frac{R(q^*) - R(q_{k^*})}{R(q^*)} \leq O\left(\sqrt{\frac{\log N}{N}}\right).$$

985 Taking the square root, we obtain  $q_{k^*} \geq q^* - O\left(\sqrt[4]{\frac{\log N}{N}}\right)$ .

986 To prove (2), note that by Claim E.4, we have  $\frac{k^*}{N} \geq q_{k^*} - O\left(\sqrt{\frac{\log N}{N}}\right) \geq q^* - O(\epsilon)$ .

987 Finally, (3) follows from

$$\frac{v_{k^*}}{v^*} = \frac{R(q_{k^*})}{q_{k^*}} \frac{q^*}{R(q^*)} \leq 1 \cdot \frac{q^*}{q_{k^*}} \leq \frac{q^*}{q^* - O(\epsilon)} = 1 + \frac{O(\epsilon)}{q^* - O(\epsilon)} \leq 1 + O\left(\frac{\epsilon}{e(\alpha)}\right).$$

988 □

## 989 E.2 Detailed Proof of Theorem 2.1 for $\alpha$ -Strongly Regular Distributions

990 Let  $\Delta U(\mathbf{v}_i, b_I, v_{-I}) = U_i^{\text{TP}}(\mathbf{v}_i, b_I, v_{-I}) - U_i^{\text{TP}}(\mathbf{v}_i, v_I, v_{-I})$ . Similar to the proof for bounded distributions,  
 991 we have for any  $\mathbf{v}_i, b_I, v_{-I}$ ,

$$\Delta U(\mathbf{v}_i, b_I, v_{-I}) \leq m_2 \cdot \left( \text{ERM}^c(v_I, v_{-I}) - \text{ERM}^c(b_I, v_{-I}) \right) \leq m_2 \cdot \text{ERM}^c(v_I, v_{-I}) \cdot \delta_{m_1}^{\text{worst}}(v_{-I}).$$

992 By Claim A.2, we have  $\text{ERM}^c(v_I, v_{-I}) \leq \text{ERM}^c(\bar{v}_I, v_{-I})$  where  $\bar{v}_I$  can be any  $m_1$  values (e.g.,  $+\infty$ ) that  
 993 are greater than the maximal value in  $v_{-I}$ , when  $c \geq \frac{m_1}{T_1 K_1}$ .

994 Let  $N = T_1 K_1$ , define two threshold prices  $T_1 = N^{\frac{3(1-\alpha)}{2\alpha}} v^*$  and  $T_2 = [1 + O(\epsilon)]v^*$  where  $\epsilon = \sqrt[4]{\frac{\log N}{N}}$  as  
 995 in Lemma E.6.

996 Note that for sufficiently large  $N$ ,  $T_1 > T_2$ . With the random draw of  $v_{-I}$  from  $F$ , denote the random variable  
 997  $\text{ERM}^c(\bar{v}_I, v_{-I})$  by  $P$ , we have:

$$\begin{aligned} \mathbb{E}_{v_{-I}} [\Delta U(\mathbf{v}_i, b_I, v_{-I})] &= \mathbb{E}_{v_{-I}} [\Delta U(\mathbf{v}_i, b_I, v_{-I}) \mid P \leq T_2] \cdot \Pr[P \leq T_2] \\ &\quad + \mathbb{E}_{v_{-I}} [\Delta U(\mathbf{v}_i, b_I, v_{-I}) \mid T_2 < P \leq T_1] \cdot \Pr[T_2 < P \leq T_1] \\ &\quad + \mathbb{E}_{v_{-I}} [\Delta U(\mathbf{v}_i, b_I, v_{-I}) \mid P > T_1] \cdot \Pr[P > T_1] \\ &\stackrel{\text{def}}{=} \mathbb{E}_1 + \mathbb{E}_2 + \mathbb{E}_3. \end{aligned} \tag{27}$$

998

1. For the first term  $\mathbb{E}_1$ ,

$$\begin{aligned}
\mathbb{E}_1 &= \mathbb{E}_{v_{-I}} [\Delta U(\mathbf{v}_i, b_I, v_{-I}) \mid P \leq T_2] \cdot \Pr[P \leq T_2] \\
&\leq \mathbb{E}_{v_{-I}} [m_2 \cdot P \cdot \delta_{m_1}^{\text{worst}}(v_{-I}) \mid P \leq T_2] \cdot \Pr[P \leq T_2] \\
&\leq m_2 \cdot T_2 \cdot \mathbb{E}_{v_{-I}} [\delta_{m_1}^{\text{worst}}(v_{-I}) \mid P \leq T_2] \cdot \Pr[P \leq T_2] \\
&\leq m_2 \cdot [1 + O(\epsilon)] v^* \cdot \mathbb{E}_{v_{-I}} [\delta_{m_1}^{\text{worst}}(v_{-I})] \\
&= O(m_2 \cdot v^* \cdot \Delta_{N, m_1}^{\text{worst}}).
\end{aligned}$$

999

2. For the second term, we claim that  $\mathbb{E}_2 = O\left(\frac{m_2 v^*}{\sqrt{N}}\right)$ .

1000

By Lemma E.6, we have  $\Pr[P > [1 + O(\epsilon)]v^*] \leq O\left(\frac{1}{N^{\frac{3-2\alpha}{2\alpha}}}\right)$ . Therefore,

$$\begin{aligned}
\mathbb{E}_2 &= \mathbb{E}_{v_{-I}} [\Delta U(\mathbf{v}_i, b_I, v_{-I}) \mid T_2 < P \leq T_1] \cdot \Pr[T_2 < P \leq T_1] \\
&\leq \mathbb{E}_{v_{-I}} [m_2 \cdot P \cdot 1 \mid T_2 < P \leq T_1] \cdot \Pr[T_2 < P \leq T_1] \\
&\leq m_2 \cdot T_1 \cdot \Pr[P > T_2] \\
&\leq m_2 \cdot N^{\frac{3(1-\alpha)}{2\alpha}} v^* \cdot O\left(\frac{1}{N^{\frac{3-2\alpha}{2\alpha}}}\right) \\
&= O\left(\frac{m_2 v^*}{\sqrt{N}}\right).
\end{aligned}$$

1001

3. For the third term, we claim that  $\mathbb{E}_3 = o\left(\frac{m_2 v^*}{\sqrt{N}}\right)$ .

1002

Let  $B$  be the upper bound on the support of  $F$  ( $B$  can be  $+\infty$ ). Let  $F_P(x)$  be the distribution of  $P$ .

1003

For convenience, suppose it is continuous and has density  $f_P(x)$ . We have:

$$\begin{aligned}
\mathbb{E}_3 &= \mathbb{E}_{v_{-I}} [\Delta U(\mathbf{v}_i, b_I, v_{-I}) \mid P > T_1] \cdot \Pr[P > T_1] \\
&\leq \mathbb{E}_{v_{-I}} [m_2 \cdot P \cdot 1 \mid P > T_1] \cdot \Pr[P > T_1] \\
&= m_2 \cdot \mathbb{E}_{v_{-I}} [P \mid P > T_1] \cdot \Pr[P > T_1] \\
&= m_2 \cdot \int_{T_1}^B x f_P(x) dx \\
&= m_2 \cdot \left( \int_{T_1}^B [1 - F_P(x)] dx + T_1 [1 - F_P(T_1)] \right).
\end{aligned}$$

1004

Let  $\max\{v_{-I}\}$  denote the maximum value in the  $N - m_1$  samples  $v_{-I}$ . By Lemma E.3, we have for any  $x \geq v^*$ ,

1005

$$1 - F_P(x) = \Pr[P > x] \leq \Pr[\max\{v_{-I}\} > x] \leq N \left( \frac{v^*}{(1-\alpha)x + \alpha v^*} \right)^{\frac{1}{1-\alpha}}.$$

1006

Thus,

$$\begin{aligned}
&\int_{T_1}^B [1 - F_P(x)] dx + T_1 [1 - F_P(T_1)] \\
&\leq \int_{T_1}^B N \left( \frac{v^*}{(1-\alpha)x + \alpha v^*} \right)^{\frac{1}{1-\alpha}} dx + T_1 N \left( \frac{v^*}{(1-\alpha)T_1 + \alpha v^*} \right)^{\frac{1}{1-\alpha}} \\
&\leq \frac{N}{\alpha} \cdot \frac{(v^*)^{\frac{1}{1-\alpha}}}{[(1-\alpha)T_1 + \alpha v^*]^{\frac{1}{1-\alpha}}} + T_1 N \left( \frac{v^*}{(1-\alpha)T_1 + \alpha v^*} \right)^{\frac{1}{1-\alpha}} \\
&= \frac{N}{\alpha} \cdot (T_1 + \alpha v^*) \left( \frac{v^*}{(1-\alpha)T_1 + \alpha v^*} \right)^{\frac{1}{1-\alpha}} \\
&= O\left(\frac{v^*}{\sqrt{N}}\right),
\end{aligned}$$

1007

as desired.

1008

Combining the three items,

$$\mathbb{E}_{v_{-I}} [\Delta U(v_I, b_I, v_{-I})] = O(m_2 v^* \Delta_{N, m_1}^{\text{worst}}) + O\left(\frac{m_2 v^*}{\sqrt{N}}\right),$$

1009

where the constants in  $O$ 's depend on  $\alpha$ .



## 1010 F Lower Bounds

### 1011 F.1 Discussion

1012 **A lower bound on  $\Delta_{N,m}^{\text{worst}}$ .** Theorem 1.3 gives an upper bound on  $\Delta_{N,m}^{\text{worst}}$  for a specific range of  $c$ 's. When one  
 1013 considers respective lower bounds, a preliminary question would be: how does the choice of  $c$  affect the possible  
 1014 lower bound? The following result shows that it is enough to prove a lower bound for one specific  $c$  in the range  
 1015 of allowed  $c$ 's. The same lower bound will then hold for all  $c$ 's in that range.

1016 **Proposition F.1.** *Let  $\Delta_{N,m}^{\text{worst}}(c)$  denote the worst-case incentive-awareness measure of ERM<sup>c</sup>. Suppose*  
 1017  *$m = o(\sqrt{N})$ .*

- 1018 • *For bounded distributions,  $\Delta_{N,m}^{\text{worst}}(c) = \Delta_{N,m}^{\text{worst}}(\frac{m}{N})$ , for any  $c \in [\frac{m}{N}, \frac{1}{2D}]$ .*
- 1019 • *For MHR distributions,  $\Delta_{N,m}^{\text{worst}}(c)$  is bounded by  $\Delta_{N,m}^{\text{worst}}(\frac{m}{N}) \pm O(\frac{1}{N})$ , for any  $c \in [\frac{m}{N}, \frac{1}{4e}]$ .*

*Proof.* Fix any  $d \in (0, 1)$  and any  $c \in [\frac{m}{N}, \frac{d}{2}]$ . Recall that  $\Delta_{N,m}^{\text{worst}}(c) = \mathbb{E}_{v_{-I} \sim F}[\delta_m^{\text{worst}}(v_{-I}, c)]$ , where,  
 letting  $\bar{v}_I$  be a vector of  $m$  identical values that are equal to  $\max v_{-I}$ , then by Claim A.2,

$$\delta_m^{\text{worst}}(v_{-I}, c) = 1 - \frac{\inf_{b_I \in \mathbb{R}_+^m} P(b_I, v_{-I}, c)}{P(\bar{v}_I, v_{-I}, c)}.$$

1020 Let  $k^*(v, c) = \arg \max_{i > cN} \{iv_{(i)}\}$  where  $v = (\bar{v}_I, v_{-I})$ , i.e. the index of  $P(v, c)$  in  $v$ . We show that, if  
 1021  $k^*(v, c) > dN$  for  $c = \frac{m}{N}$ , then

- 1022 •  $P(\bar{v}_I, v_{-I}, c') = P(\bar{v}_I, v_{-I}, \frac{m}{N})$  for any  $c' \in [\frac{m}{N}, d]$ . To see this, note that

$$k^*(v, \frac{m}{N}) = \arg \max_{i > \frac{m}{N}} \{iv_{(i)}\} = \arg \max_{i > dN} \{iv_{(i)}\} = \arg \max_{i > c'N} \{iv_{(i)}\} = k^*(v, c'),$$

1023 where the second equality follow from our assumption that  $k^*(v, \frac{m}{N}) > dN > m$  and the third  
 1024 equality is because  $\frac{m}{N} \leq c' \leq d$ .

- 1025 •  $\inf_{b_I \in \mathbb{R}_+^m} P(b_I, v_{-I}, c') = \inf_{b_I \in \mathbb{R}_+^m} P(b_I, v_{-I}, \frac{m}{N})$  for any  $c' \in [\frac{m}{N}, \frac{d}{2}]$ . Fix  $c = \frac{m}{N}$  and consider  
 1026 any  $c' \in [\frac{m}{N}, \frac{d}{2}]$ . Let  $b_I \in \mathbb{R}_+^m$  be any bids such that  $P(b_I, v_{-I}, c) < P(\bar{v}_I, v_{-I}, c)$ . Let  $v^b =$   
 1027  $(b_I, v_{-I})$ . Consider  $k^*(v^b, c)$ , we have  $v_{(k^*(v^b, c))}^b < v_{(k^*(v, c))}$ , so  $k^*(v^b, c)$  must be greater than  
 1028 the index of  $v_{(k^*(v, c))}$  in  $v^b$ . The index of  $v_{(k^*(v, c))}$  in  $v^b$  is at least  $k^*(v, c) - m$ , thus  $k^*(v^b, c) >$   
 1029  $k^*(v, c) - m > dN - m \geq \frac{d}{2}N$ . We claim that  $P(b_I, v_{-I}, c') = P(b_I, v_{-I}, c)$ . To see this, note  
 1030 that

$$k^*(b_I, v_{-I}, \frac{m}{N}) = \arg \max_{i > \frac{m}{N}} \{iv_{(i)}^b\} = \arg \max_{i > \frac{d}{2}N} \{iv_{(i)}^b\} = \arg \max_{i > c'N} \{iv_{(i)}^b\} = k^*(b_I, v_{-I}, c'),$$

1031 where the second equality is because  $k^*(v^b, \frac{m}{N}) > \frac{d}{2}N$ , and the third equality follows from  $\frac{m}{N} \leq$   
 1032  $c' \leq \frac{d}{2}$ .

1033 Thus,  $\delta_m^{\text{worst}}(v_{-I}, c) = \delta_m^{\text{worst}}(v_{-I}, \frac{m}{N})$  for any  $c \in [\frac{m}{N}, \frac{d}{2}]$ . Define  $\mathbb{E}(c) = [k^* \leq dN]$ , then

$$\begin{aligned} \Delta_{N,m}^{\text{worst}}(c) &= \mathbb{E}[\delta_m^{\text{worst}}(v_{-I}, c)] \\ &= \mathbb{E}[\delta_m^{\text{worst}}(v_{-I}, c) \mid \overline{\mathbb{E}(c)}] \cdot \Pr[\overline{\mathbb{E}(c)}] + \mathbb{E}[\delta_m^{\text{worst}}(v_{-I}, c) \mid \mathbb{E}(c)] \cdot \Pr[\mathbb{E}(c)] \\ &= \mathbb{E}[\delta_m^{\text{worst}}(v_{-I}, \frac{m}{N}) \mid \overline{\mathbb{E}(c)}] \cdot \Pr[\overline{\mathbb{E}(c)}] + \mathbb{E}[\delta_m^{\text{worst}}(v_{-I}, c) \mid \mathbb{E}(c)] \cdot \Pr[\mathbb{E}(c)]. \end{aligned}$$

1034 For bounded distributions, consider  $d = \frac{1}{D}$  and  $c \in [\frac{m}{N}, \frac{1}{2D}]$ . We have proved in Theorem 1.3 that  $\Pr[\mathbb{E}(c)] = 0$   
 1035 for any  $c \in [\frac{m}{N}, \frac{d}{2}]$ . Thus  $\Delta_{N,m}^{\text{worst}}(c) = \mathbb{E}[\delta_m^{\text{worst}}(v_{-I}, \frac{m}{N}) \mid \overline{\mathbb{E}(c)}] \cdot \Pr[\overline{\mathbb{E}(c)}] = \Delta_{N,m}^{\text{worst}}(\frac{m}{N})$ .

1036 For MHR distributions, let  $d = \frac{1}{2e}$ , as proved in Lemma D.5,  $\Pr[\mathbb{E}] = O(\frac{1}{N})$  for  $c \in [\frac{m}{N}, \frac{1}{4e}]$ . Then  
 1037  $0 \leq \mathbb{E}[\delta_m^{\text{worst}}(v_{-I}, c) \mid \mathbb{E}(c)] \cdot \Pr[\mathbb{E}(c)] \leq 1 \cdot \Pr[\mathbb{E}(c)] = O(\frac{1}{N})$ . Thus  $|\Delta_{N,m}^{\text{worst}}(c) - \Delta_{N,m}^{\text{worst}}(\frac{m}{N})| \leq O(\frac{1}{N})$   
 1038 for any  $c \in [\frac{m}{N}, \frac{1}{4e}]$ .

1039 □

1040 Lavi et al. [26] show a lower bound that can be compared to our upper bounds in Theorem 1.3. Specifically,  
 1041 they show that for the two-point distribution  $v = 1$  and  $v = 2$ , each w.p. 0.5,  $\Delta_{N,1}^{\text{worst}} = \Omega(1/\sqrt{N})$ . It is easy to  
 1042 adopt their analysis to any two-point distribution with  $v_1 = 1$  and  $v_2 > 1$ . Since this is a bounded distribution,  
 1043 we obtain the following corollary:

1044 **Corollary F.2.** For the class of bounded distribution with support in  $[1, D]$ , and any choice of  $\frac{m}{N} \leq c \leq \frac{1}{2D}$ ,  
 1045  $\text{ERM}^c$  gives  $\Delta_{N,m}^{\text{worst}}(c) = \Omega(\frac{1}{\sqrt{N}})$  where the constant in  $\Omega$  depends on  $D$ .

1046 It remains open to prove other lower bounds on  $\Delta_{N,m}^{\text{worst}}$ , especially for MHR distributions.

1047 **A lower bound on the approximate truthfulness parameter,  $\epsilon_1$ .** Since  $\Delta_{N,m}^{\text{worst}}$  only upper bounds the  
 1048 approximate truthfulness parameter  $\epsilon_1$ , a lower bound on  $\Delta_{N,m}^{\text{worst}}$  does not immediately implies a lower bound on  
 1049  $\epsilon_1$ . However, an argument similar to above shows the same lower bound directly on  $\epsilon_1$ . Consider the two-point  
 1050 distribution  $F$  where for  $X \sim F$ ,  $\Pr[X = 1] = 1 - \frac{1}{D}$  and  $\Pr[X = D] = \frac{1}{D}$ . For simplicity let  $K_1 = K_2 = 2$   
 1051 and suppose bidder  $i$  participates in  $m_1$  and  $m_2$  auctions in the two phases, respectively. Let  $N = T_1 K_1$  and  
 1052 assume  $m_1 = o(\sqrt{N})$ . Suppose the first-phase mechanism  $\mathcal{M}$  is the second price auction with no reserve price.  
 1053 Then,

1054 **Proposition F.3.** In the above setting,  $\epsilon_1 = \Omega\left(\frac{m_2}{\sqrt{N}}\right)$  for any  $c \in [\frac{m_1}{N}, \frac{1}{2D}]$ , where the constant in  $\Omega$  depends  
 1055 on  $D$ .

1056 The proof is in Appendix F.2. Once again, it remains open (and interesting, we believe) to prove a lower  
 1057 bound for MHR distributions, and to close the gap between our upper bound for bounded distributions which is  
 1058  $O(N^{-1/3} \log^2 N)$ .

## 1059 F.2 Proof of Proposition F.3: Lower Bound for the Two-Phase Model

1060 Consider the two-point distribution  $F$  where for  $X \sim F$ ,  $\Pr[X = 1] = 1 - \frac{1}{D}$  and  $\Pr[X = D] = \frac{1}{D}$ . For  
 1061 simplicity let  $K_1 = K_2 = 2$ , and suppose bidder  $i$  participates in  $m_1$  and  $m_2$  auctions in the two phases,  
 1062 respectively. Let  $N = T_1 K_1$  and assume  $m_1 = o(\sqrt{N})$ . Suppose the first-phase mechanism  $\mathcal{M}$  is the  
 1063 second price auction with no reserve price. We argue that to satisfy  $\epsilon_1$ -approximate truthfulness,  $\epsilon_1$  must be  
 1064  $\Omega\left(\frac{m_2(D-1)^2}{\sqrt{(D-1)N}}\right)$ , for  $c \in [\frac{m}{N}, \frac{1}{2D}]$ .

1065 Suppose the values of bidder  $i$  across two phases are all  $D$ 's, i.e.,

$$\mathbf{v}_i = (\overbrace{D, \dots, D}^{m_1}, \overbrace{D, \dots, D}^{m_2}),$$

1066 and bidder  $i$  bids  $m_1 (D - \epsilon)$ 's with  $\epsilon = \frac{D^2}{N}$  in the first phase (assume  $N \gg D^2$ ),

$$b_I = (\overbrace{D - \epsilon, \dots, D - \epsilon}^{m_1}).$$

1067 Recall the definition of the interim utility of bidder  $i$ :

$$\mathbb{E}_{v_{-I}} \left[ U_i^{\text{TP}}(\mathbf{v}_i, b_I, v_{-I}) \right] = \mathbb{E}_{v_{-I}} \left[ U_i^{\mathcal{M}}(\mathbf{v}_i, b_I, v_{-I}) + m_2 u^{K_2}(D, P(b_I, v_{-I})) \right].$$

1068 • First consider the increase of interim utility in the second phase. If the reserve price is  $D$ , then bidder  
 1069  $i$ 's utility is

$$u^{K_2}(D, D) = 0. \quad (28)$$

1070 If the reserve price is 1, then her utility becomes

$$u^{K_2}(D, 1) = (1 - \frac{1}{D}) \cdot (D - 1) + \frac{1}{D} \cdot 0 = \frac{(D-1)^2}{D}. \quad (29)$$

1071 We then consider the probability that the reserve price is decreased from  $D$  to 1 because bidder  $i$   
 1072 deviates from  $D$  to  $D - \epsilon$ . This probability is over the random draw of  $N - m_1$  values  $v_{-I}$ . Suppose  
 1073 there are exactly  $(\frac{1}{D}N + 1 - m_1)$   $D$ 's in  $v_{-I}$ . Then when bidder  $i$  bids truthfully, there are  $(\frac{1}{D}N + 1)$   
 1074  $D$ 's in  $(v_I, v_{-I})$  in total, which results in  $P(v_I, v_{-I}) = D$  because  $(\frac{1}{D}N + 1) \cdot D > N \cdot 1$ . However,  
 1075 if bidder  $i$  deviates to  $b_I$ , then  $P(b_I, v_{-I})$  becomes 1, because

$$(\frac{1}{D}N + 1) \cdot (D - \epsilon) = N(1 + \frac{D}{N})(1 - \frac{D}{N}) < N \cdot 1, \quad \text{and} \quad (\frac{1}{D}N + 1 - m_1) \cdot D \leq N \cdot 1.$$

1076 Thus, the reserve price is decreased from  $D$  to 1 with probability at least:

$$\Pr[\text{Bin}(N - m_1, \frac{1}{D}) = \frac{1}{D}N + 1 - m_1] = \Omega\left(\frac{1}{\sqrt{\frac{1}{D}(1 - \frac{1}{D})N}}\right). \quad (30)$$

1077 Combining (30), (29) and (28), we obtain

$$\begin{aligned} & \mathbb{E}_{v_{-I}} \left[ m_2 u^{K_2}(D, P(b_I, v_{-I})) - m_2 u^{K_2}(D, P(v_I, v_{-I})) \right] \\ & \geq \Omega \left( \frac{1}{\sqrt{\frac{1}{D}(1 - \frac{1}{D})N}} \right) m_2 \left( \frac{(D-1)^2}{D} - 0 \right) = \Omega \left( \frac{m_2(D-1)^2}{\sqrt{(D-1)N}} \right). \end{aligned} \quad (31)$$

1078 • Then we upper bound the utility loss due to non-truthful bidding in the first phase for bidder  $i$ . Note  
1079 that since  $\mathcal{M}$  is the second price auction with no reserve price, no matter bidder  $i$  bids  $D$  or  $D - \epsilon > 1$ ,  
1080 her interim utility is the same:

$$\begin{aligned} & \mathbb{E}_{v_{-I}} \left[ U_i^{\mathcal{M}}(\mathbf{v}_i, v_I, v_{-I}) \right] = m_1 \left( \left(1 - \frac{1}{D}\right)(D-1) + \frac{1}{D} \cdot 0 \right) = \frac{m_1(D-1)^2}{D}, \\ & \mathbb{E}_{v_{-I}} \left[ U_i^{\mathcal{M}}(\mathbf{v}_i, b_I, v_{-I}) \right] = m_1 \left( \left(1 - \frac{1}{D}\right)(D-1) + \frac{1}{D} \cdot 0 \right) = \frac{m_1(D-1)^2}{D}. \end{aligned}$$

1082 Thus

$$\mathbb{E}_{v_{-I}} \left[ U_i^{\mathcal{M}}(\mathbf{v}_i, b_I, v_{-I}) - U_i^{\mathcal{M}}(\mathbf{v}_i, v_I, v_{-I}) \right] = 0. \quad (32)$$

1083 Finally, by (31) and (32), we have

$$\mathbb{E}_{v_{-I}} \left[ U_i^{\text{TP}}(\mathbf{v}_i, b_I, v_{-I}) - U_i^{\text{TP}}(\mathbf{v}_i, v_I, v_{-I}) \right] \geq \Omega \left( \frac{m_2(D-1)^2}{\sqrt{(D-1)N}} \right),$$

1084 which gives a lower bound on  $\epsilon_1$ .

## 1085 G Unbounded Regular Distributions

### 1086 G.1 Discussion

1087 Theorem 2.2 shows that approximate truthfulness and revenue optimality can be obtained simultaneously for  
1088 bounded (regular) distributions and for MHR distributions. A natural question would then be: what is the largest  
1089 class of value distribution that we can consider? If  $K_1 > 1$  or  $K_2 > 1$  (i.e., each auction includes multiple  
1090 bidders, at least 2), then running a second price auction with an anonymous reserve price may not be optimal if  
1091 the distribution is non-regular [30]. Moreover, even in the one-bidder case, the sample complexity literature  
1092 analyzes the ERM algorithm only for regular or for non-regular and bounded distributions. For other classes  
1093 of distributions, ERM does not seem to be the correct choice. Thus, the class of general unbounded regular  
1094 distributions is the largest class we can consider. Still, our results do not cover this entire class since MHR  
1095 distributions is a strict sub-class of regular distributions and for regular but non-MHR distributions we assume  
1096 boundedness.

1097 Our results can be generalized to the class of  $\alpha$ -strongly regular distributions with  $\alpha > 0$ . As defined in [11], a  
1098 distribution  $F$  with positive density function  $f$  on its support  $[A, B]$  where  $0 \leq A \leq B \leq +\infty$  is  $\alpha$ -strongly  
1099 regular if the virtual value function  $\phi(x) = x - \frac{1-F(x)}{f(x)}$  satisfies  $\phi(y) - \phi(x) \geq \alpha(y-x)$  whenever  $y > x$   
1100 (or  $\phi'(x) \geq \alpha$  if  $\phi(x)$  is differentiable). As special cases, regular and MHR distributions are 0-strongly and  
1101 1-strongly regular distributions, respectively. For  $\alpha > 0$ , we obtain bounds similar to MHR distributions  
1102 on  $\Delta_{N,m}^{\text{worst}}$  and approximate incentive-compatibility in the two-phase model and the uniform-price auction.  
1103 Specifically, Theorem 1.3 can be extended to any  $\alpha$ -strongly regular distribution with  $\alpha > 0$  as follows:

1104 **Theorem G.1.** *If  $F$  is  $\alpha$ -strongly regular for  $0 < \alpha \leq 1$ , then  $\Delta_{N,m}^{\text{worst}} = O\left(m \frac{\log^3 N}{\sqrt{N}}\right)$ , when  $m = o(\sqrt{N})$   
1105 and  $\frac{m}{N} \leq \left(\frac{\log N}{N}\right)^{1/3} \leq c \leq \frac{\alpha^{1/(1-\alpha)}}{4}$ . The constants in  $O$  and  $o$  depend on  $\alpha$ .*

1106 Note that this bound holds only for large enough  $N$ 's since  $\alpha^{1/(1-\alpha)} \rightarrow 0$  as  $\alpha \rightarrow 0$ . However, for any fixed  
1107  $\alpha > 0$  there exists a large enough  $N$  such that the relevant range for appropriate  $c$ 's will be non-empty.<sup>5</sup> The  
1108 proof of the upper bound on  $\Delta_{N,m}^{\text{worst}}$  is similar to the proof for MHR distributions (Lemma D.6), except that, we  
1109 need  $c \geq \left(\frac{\log N}{N}\right)^{1/3}$  to guarantee  $\Pr[E] = O\left(\frac{1}{N}\right)$  (Lemma E.6); thus we omit the proof.

1110 Similarly, both of Theorem 2.1 which says that the two-phase model is  $(O(m_2 v^* \Delta_{T_1 K_1, m_1}^{\text{worst}}) + O(\frac{m_2 v^*}{\sqrt{T_1 K_1}}))$ -BIC  
1111 and Theorem 3.1 which says that the uniform-price auction is  $(m, (O(v^* \Delta_{N,m}^{\text{worst}}) + O(\frac{v^*}{\sqrt{N}})))$ -group BIC, hold  
1112 for any  $\alpha$ -strongly regular distribution with  $\alpha > 0$ . The proof of the former is in Appendix E.2 and the latter is  
1113 omitted.

<sup>5</sup>The constant in the big  $O$  depends on  $\alpha$ , so it is constant only if the distribution function is fixed. However, it goes to infinity as  $\alpha \rightarrow 0$ .

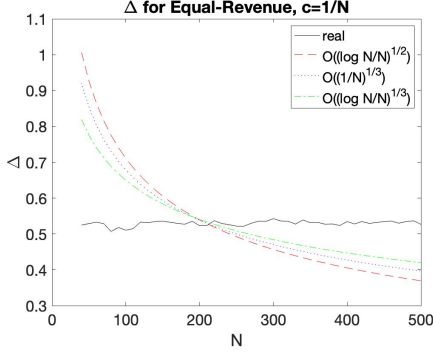

Figure 1: For equal-revenue distribution,  $\Delta_{N,1}^{\text{worst}}$  (in black) on the  $y$ -axis as a function of  $N$  on the  $x$ -axis, with  $c = 1/N$ . Three other functions are plotted for reference.

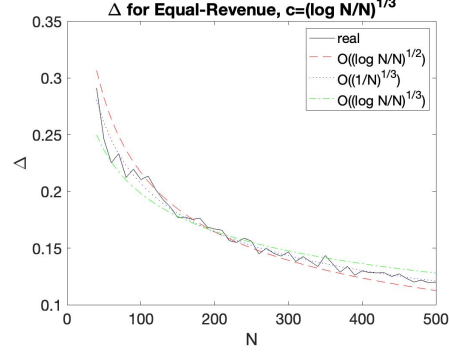

Figure 2: For equal-revenue distribution,  $\Delta_{N,1}^{\text{worst}}$  (in black) on the  $y$ -axis as a function of  $N$  on the  $x$ -axis, with  $c = \Theta((\log N/N)^{1/3})$ . Three other functions are plotted for reference.

1114 It remains an open problem for future research whether  $\text{ERM}^c$  is incentive-aware in the large for regular  
 1115 distributions that are not  $\alpha$ -strongly regular for any  $\alpha > 0$ . For these distributions additional technical challenges  
 1116 exist since the choice of  $c$  in  $\text{ERM}^c$  creates a clash between approximate truthfulness and approximate revenue  
 1117 optimality. Unlike MHR and bounded regular distributions for which we can fix  $c = m/N$  to obtain approximate  
 1118 truthfulness and revenue optimality, for arbitrary unbounded distribution we have to choose  $c$  more carefully. If  
 1119  $c$  is too large, for example, a positive constant, then we cannot obtain nearly optimal revenue.

1120 Specifically, to obtain close-to-optimal revenue for all bounded distributions on  $[1, D]$  it is easy to verify that we  
 1121 need  $c \leq 1/D$ . Since the class of unbounded regular distributions contains all bounded regular distributions for  
 1122 all  $D \in \mathbb{R}_+$ , it follows that  $c$  cannot be a constant. We therefore need to consider a non-constant  $c(N)$ . In fact,  
 1123 it has been shown in [23] that if  $c(N) \rightarrow 0$  as  $N \rightarrow \infty$  then approximate revenue optimality can be satisfied.  
 1124 However, if  $c$  is too small, truthfulness will be violated, as discussed in the following two examples (assume  
 1125  $m = 1$  for simplicity).

1126 **Example G.2** (Small  $c$  hurts truthfulness). Suppose we choose  $c(N) = \frac{1}{N}$ , that is,  $\text{ERM}^c$  ignores only the  
 1127 largest sample. Consider the equal-revenue distribution  $F(v) = 1 - \frac{1}{v}$  for  $v \in [1, +\infty)$ . Note that this is a  
 1128 0-strongly regular distribution but not  $\alpha$ -strongly regular for any  $\alpha > 0$  since for any  $x$ ,  $\phi(x) = 0$ . Similarly to  
 1129 Yao [31], we prove in Appendix G.2 that  $\Delta_{N,1}^{\text{worst}}$  does not go to 0 as  $N \rightarrow +\infty$ . This is also visible in Fig. 1,  
 1130 which shows in black  $\Delta_{N,1}^{\text{worst}}$  (on the  $y$ -axis) as a function of  $N$  (on the  $x$ -axis). This was obtained via simulation,  
 1131 for  $c = 1/N$ . Three other functions are plotted in other colors, for reference. However, whether  $\Delta_{N,1}^{\text{worst}} \rightarrow 0$   
 1132 crucially depends on the choice of  $c$ , as can be seen in Fig. 2, where  $\Delta_{N,1}^{\text{worst}}$  seems to converge to zero with  
 1133  $c = \Theta((\log N/N)^{1/3})$ .

1134 **Example G.3** (Does an intermediate  $c$  hurt truthfulness as well?). Now assume  $c = \Theta((\log N/N)^{1/3})$ , and  
 1135 consider the “triangular” distribution  $F(v) = 1 - \frac{1}{v+1}$  for  $v \in [0, +\infty)$ . This distribution can be seen as the  
 1136 limit of a series of bounded regular distributions whose upper bounds and optimal reserve prices both tend to  
 1137  $+\infty$ . Note that it is a regular distribution but not  $\alpha$ -strongly regular for any  $\alpha > 0$ . We do not know whether  
 1138  $\Delta_{N,1}^{\text{worst}} \rightarrow 0$  as  $N \rightarrow \infty$  (see Fig. 3). In particular, our main lemma (Lemma B.1) may not suffice to analyze this  
 1139 distribution as  $\Pr[\text{E}]$  (as defined in that lemma) is unlikely to go to zero as  $N$  goes to infinity (see Fig. 4 for  
 1140 simulation results).

## 1141 G.2 Proof of Example G.2: $\Delta_{N,1}^{\text{worst}} \not\rightarrow 0$ for the Equal-Revenue Distribution and $c = 1/N$

1142 We show that when  $F$  is the equal-revenue distribution,  $F(v) = 1 - \frac{1}{v}$ , ( $v \in [1, +\infty)$ ), and  $c = 1/N$ ,  $\Delta_{N,1}^{\text{worst}}$   
 1143 does not go to 0 as  $N \rightarrow +\infty$ .

1144 Recall Definition 1.2,  $\Delta_{N,1}^{\text{worst}} = \mathbb{E}_{v_{-I}}[\delta_{N,1}^{\text{worst}}(v_{-I})]$ : we draw  $N - 1$  i.i.d. values  $v_{-I} = \{v_2, \dots, v_N\}$  from  $F$ ,  
 1145 and a bidder can change any value  $v_I = v_1$  to any non-negative bid  $b_1$ . Let the other values  $v_{-I} = \{v_2, \dots, v_N\}$   
 1146 be sorted as  $v_{(2)} \geq \dots \geq v_{(N)}$ . Let  $\lambda = 10$ ,  $\lambda' = 1$ , and let  $T_{N-1}$  be the event that  $v_{(2)} > \lambda(N - 1)$  and  
 1147  $v_{(3)} < \lambda'(N - 1)$ . Let  $V_{N-1}$  be the event that  $\max_{3 \leq i \leq N} \{i \cdot v_{(i)}\} \leq \lambda(N - 1)$ .

1148 When  $v_{-I}$  satisfies event  $T_{N-1} \wedge V_{N-1}$ , then

$$\delta_m^{\text{worst}}(v_{-I}) \geq 1 - \frac{\lambda'}{\lambda}. \quad (33)$$

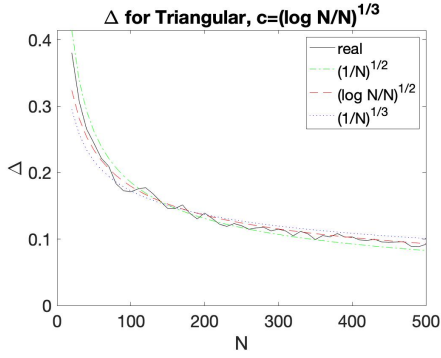

Figure 3:  $\Delta_{N,1}^{\text{worst}}$  for the triangular distribution, with  $c = \Theta((\log N/N)^{1/3})$

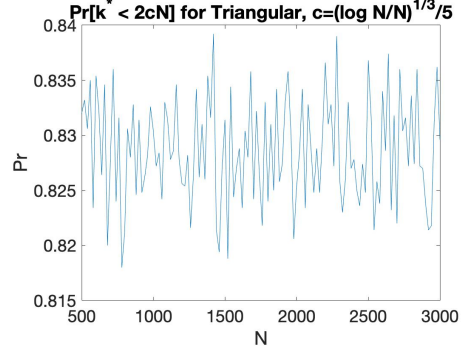

Figure 4:  $\Pr[k^* < 2cN]$  as a function of  $N$  for the triangular distribution, with  $c = (\log N/N)^{1/3}/5$ . Our simulations show that  $\Pr[E] \geq \Pr[k^* < 2cN] \geq 0.815$ .

1149 This is because when  $T_{N-1} \wedge V_{N-1}$  happens, there exists some  $v_1 > \lambda(N-1)$ , resulting  $P(v_1, v_{-1}) >$   
 1150  $\lambda(N-1)$ , while the bidder can strategically bid  $b_1 < \lambda'(N-1)$  and change the price to  $P(b_1, v_{-1}) < \lambda'(N-1)$ .  
 1151 Moreover, we will show that the probability that the event  $T_{N-1} \wedge V_{N-1}$  happens satisfies

$$\Pr[T_{N-1} \wedge V_{N-1}] \geq 0.9 \cdot \frac{1}{\lambda} e^{-\frac{2}{\lambda'}}. \quad (34)$$

Combining (33) and (34), we know

$$\Delta_m^{\text{worst}} \geq (1 - \frac{\lambda'}{\lambda}) \cdot (0.9 \cdot \frac{1}{\lambda} e^{-\frac{2}{\lambda'}}) > 0.$$

The proof of (34) is separated into two parts. Firstly,

$$\Pr[T_{N-1}] = \binom{N-1}{1} \frac{1}{\lambda(N-1)} (1 - \frac{1}{\lambda'(N-1)})^{N-2} \geq \frac{1}{\lambda} e^{-\frac{2}{\lambda'}}.$$

1152 Then we show that

$$\Pr[\overline{V_{N-1}} \mid T_{N-1}] < 0.1.$$

Let  $z_3, \dots, z_N$  be i.i.d. random draws according to  $F$  conditioning on  $z < \lambda'(N-1)$ , i.e., for any  $t \in [1, N-1]$ , recalling that  $\lambda' = 1$ ,

$$\Pr_{z \sim F}[z > t \mid z < \lambda'(N-1)] = \frac{1}{1 - \frac{1}{N-1}} \left( \frac{1}{t} - \frac{1}{N-1} \right).$$

Let  $Y_{N-1}^{\text{max}} = \max_{3 \leq i \leq N} \{i \cdot z_i\}$  where  $z_{(3)} \geq \dots \geq z_{(N)}$  is the sorted list of  $z_i$ 's. Clearly,

$$\Pr[\overline{V_{N-1}} \mid T_{N-1}] = \Pr[Y_{N-1}^{\text{max}} \geq \lambda(N-1)].$$

1153 For any  $t \geq 1$ , let  $M_t$  be the number of  $z_i$ 's ( $3 \leq i \leq N$ ) satisfying  $z_i \geq t$ , and  $B_t$  be the event that  
 1154  $t \cdot (M_t + 2) \geq \frac{\lambda(N-1)}{2}$ . Let  $t_k = \frac{N-1}{2^k}$  for  $1 \leq k \leq \lceil \log_2(N-1) \rceil$ . As the event  $Y_{N-1}^{\text{max}} \geq \lambda(N-1)$  implies  
 1155  $\bigvee_{1 \leq k \leq \lceil \log_2(N-1) \rceil} B_{t_k}$ , we have

$$\Pr[Y_{N-1}^{\text{max}} \geq \lambda(N-1)] \leq \sum_{k=1}^{\lceil \log_2(N-1) \rceil} \Pr[B_{t_k}]. \quad (35)$$

1156 Note that  $\mathbb{E}[M_t] = \frac{N-1}{t} - 1$ . Using Chernoff's bound, we have

$$\Pr[B_t] = \Pr[M_t \geq \frac{\lambda(N-1)}{2t} - 2] \leq e^{-\frac{1}{3}(\frac{N-1}{t} - 1)(\frac{\lambda}{2} - 1)^2}. \quad (36)$$

1157 Combining (35) and (36), we know

$$\Pr[\overline{V_{N-1}} \mid T_{N-1}] = \Pr[Y_{N-1}^{\text{max}} \geq \lambda(N-1)] \leq \sum_{k=1}^{\lceil \log_2(N-1) \rceil} e^{-\frac{1}{3}(2^k - 1)(\frac{\lambda}{2} - 1)^2} < \sum_{k=1}^{+\infty} e^{-\frac{1}{3}k(\frac{\lambda}{2} - 1)^2} < 0.1,$$

1158 and this completes the proof of (34).
